# Supplementary material for: One-pot synthesis of benzofused 8-oxabicyclo[3.3.1]nonanes via GaCl3-mediated cyclocondensation of o-allylbenzaldehydes and 1,3-dicarbonyl synthons
Source: Royal Society of Chemistry journal article supplement (doi:10.1039/d4ob00016a), 2024-01-01
Supplement: d4ob00016a1.pdf [file d4ob00016a1.pdf]

# Supporting Information

## One-pot Synthesis of Benzofused 8-Oxabicyclo[3.3.1]nonanes via GaCl<sub>3</sub>-Mediated Cyclocondensation of *o*-Allylbenzaldehydes and 1,3-Dicarbonyl Synthons

Meng-Yang Chang<sup>\*a,b,c</sup> and Yi-Ling Lee<sup>a</sup>

<sup>a</sup>Department of Medicinal and Applied Chemistry, Kaohsiung Medical University, Kaohsiung 807, Taiwan <sup>b</sup>Department of Medical Research, Kaohsiung Medical University Hospital, Kaohsiung 807, Taiwan <sup>c</sup>NPUST College of Professional Studies, National Pingtung University of Science and Technology, Pingtung 912, Taiwan.

\*Corresponding author, email: [mychang@kmu.edu.tw](mailto:mychang@kmu.edu.tw)

### Table of Contents

- |    |                                                                                                 |         |
|----|-------------------------------------------------------------------------------------------------|---------|
| 1. | <sup>1</sup> H NMR and <sup>13</sup> C NMR spectra copies of compounds <b>6a-6v</b> , <b>6x</b> | S2~S49  |
| 2. | X-ray crystal data of compound <b>6q</b> , <b>6r</b> , and <b>6s</b>                            | S50~S55 |

# Compound 6a (<sup>1</sup>H-NMR spectral data)

YNB720

Pulse Sequence: s2pu1  
UNITYplus-400 "unity400"  
Date: Jul 21 2022  
Solvent: CDCl<sub>3</sub>  
Ambient temperature  
Total 32 repetitions

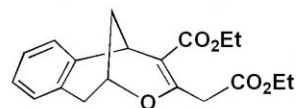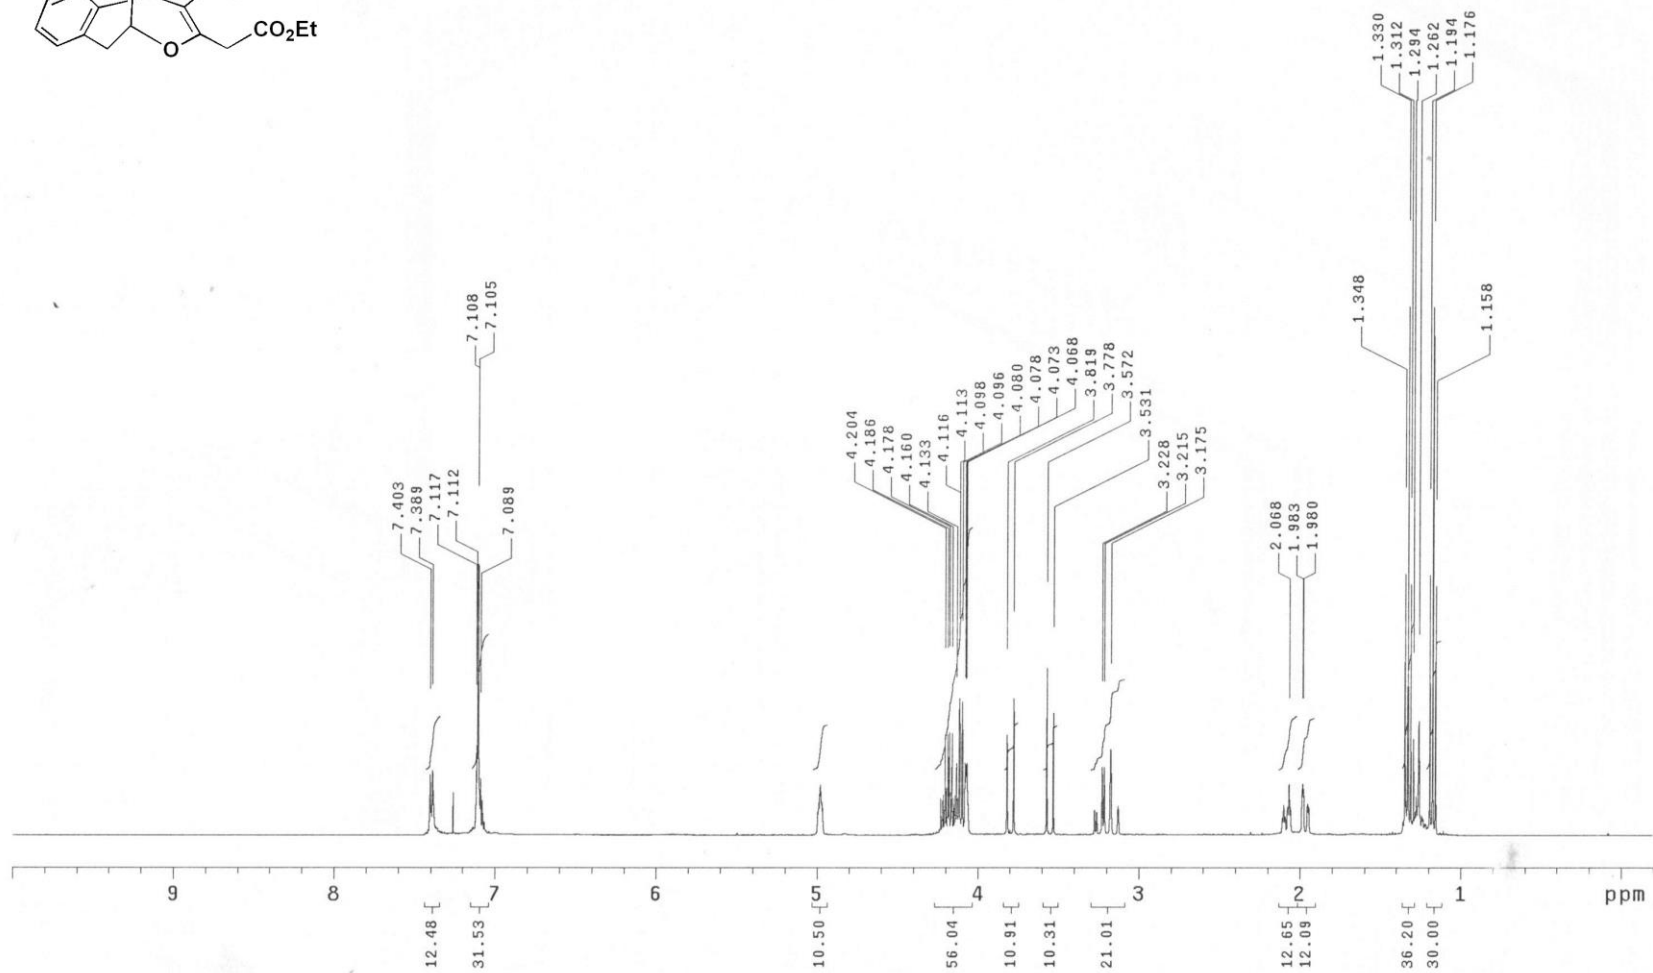

# Compound 6a (<sup>13</sup>C-NMR spectral data)

YNB720

Pulse Sequence: s2pu1

UNITYplus-400 "unity400"

Date: Jul 21 2022

Solvent: CDCl<sub>3</sub>

Ambient temperature

Total 320 repetitions

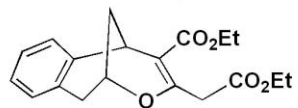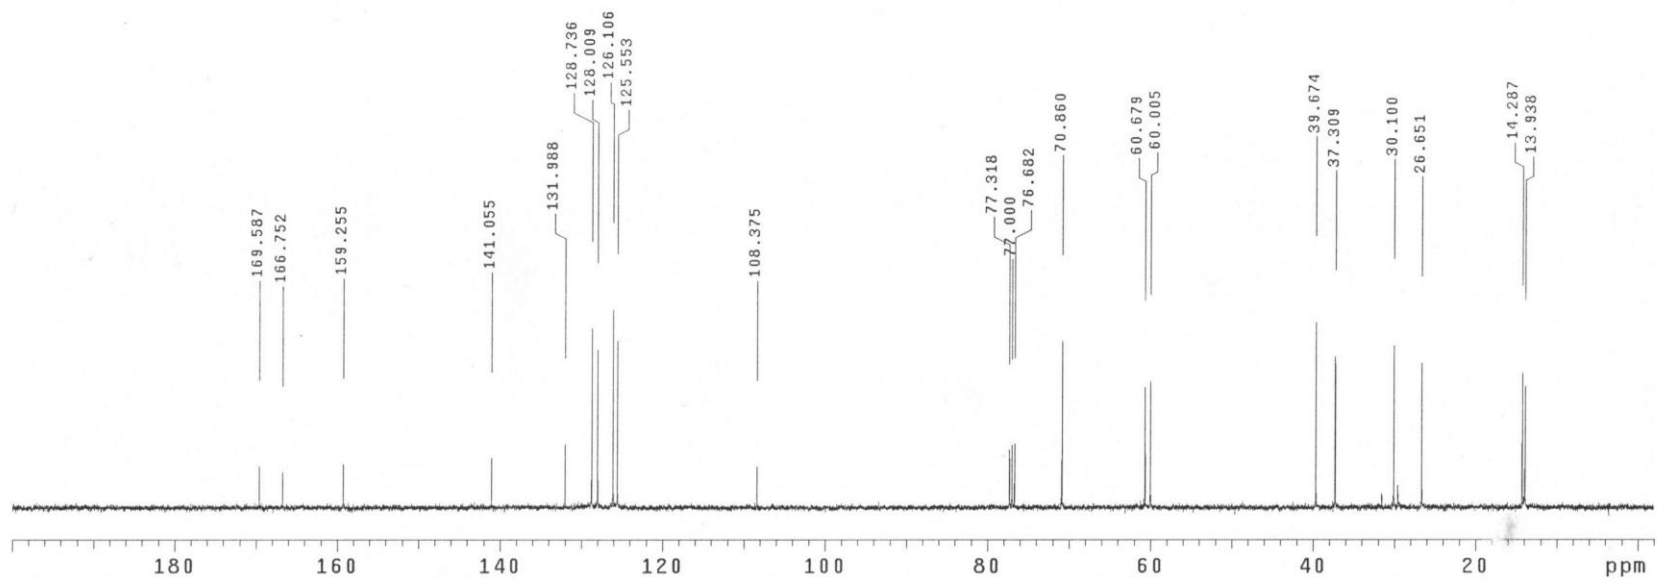

# Compound 6b (<sup>1</sup>H-NMR spectral data)

QYA607  
Pulse Sequence: s2pu1  
UNITYplus-400 "unity400"  
Date: Jun 7 2022  
Solvent: CDCl<sub>3</sub>  
Ambient temperature  
Total 32 repetitions

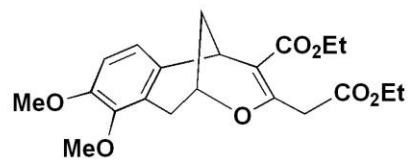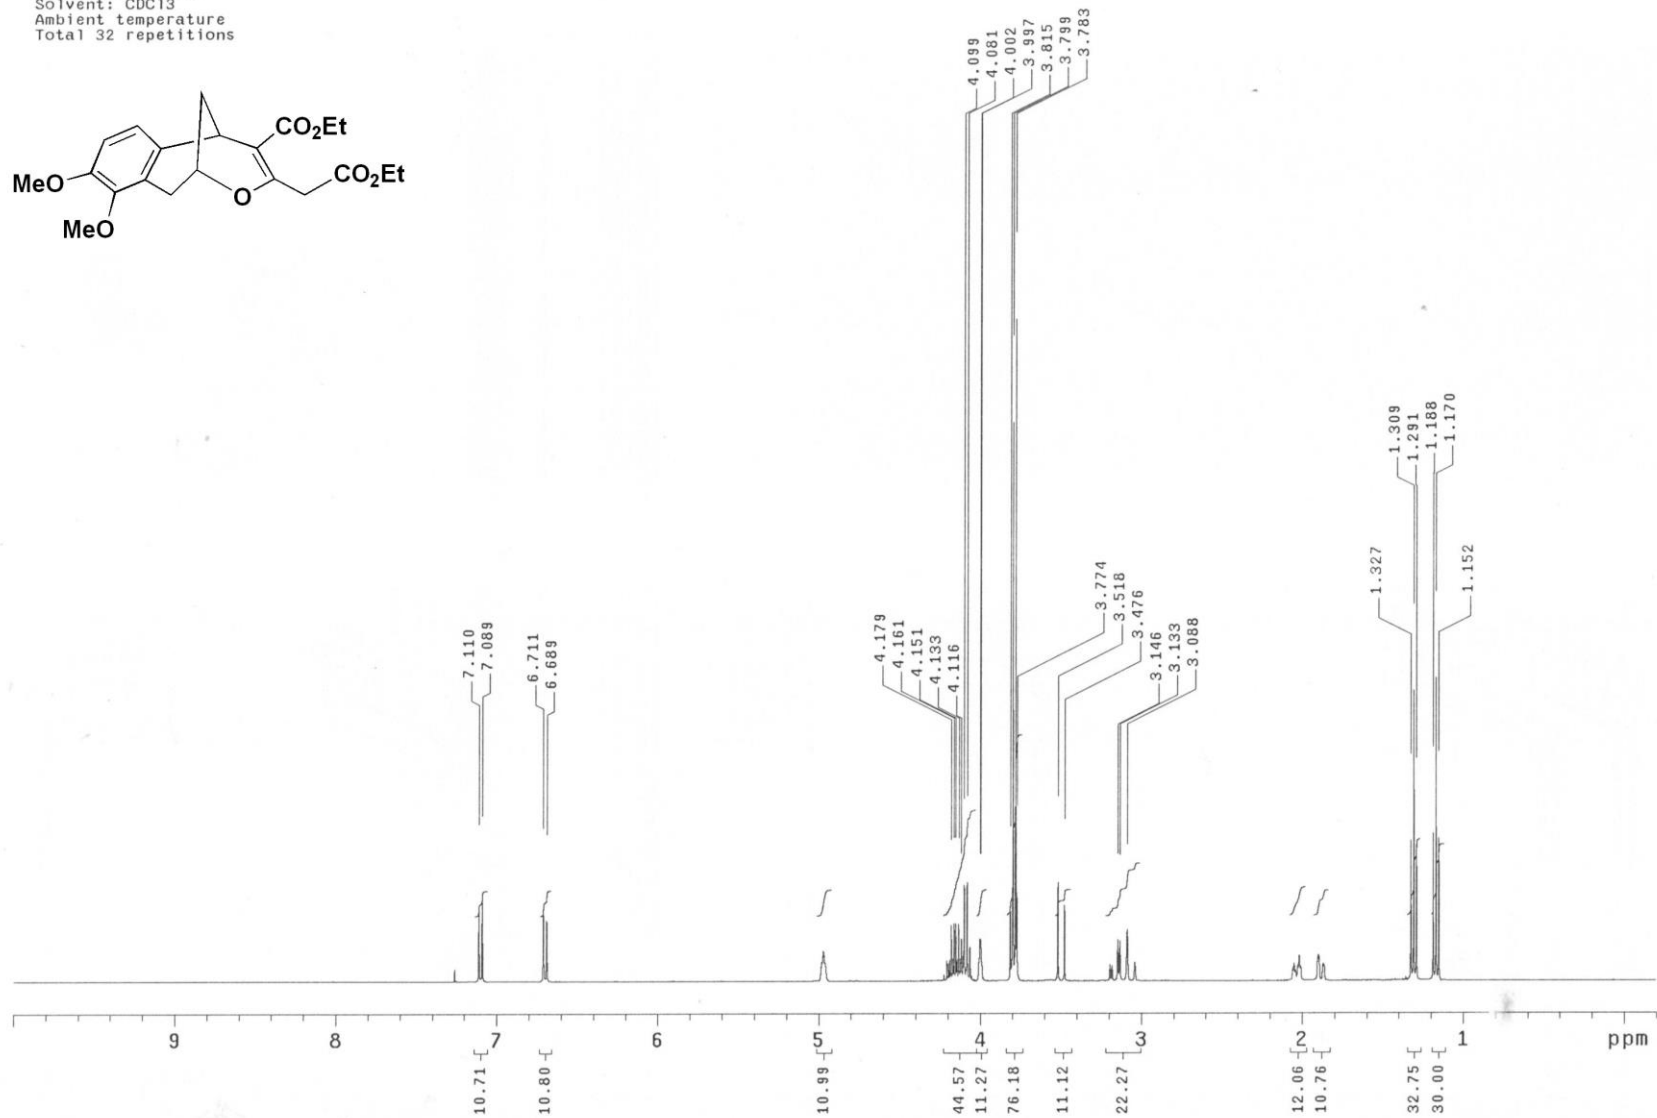

# Compound 6b (<sup>13</sup>C-NMR spectral data)

Pulse Sequence: s2pu1  
UNITYplus-400 "unity400"  
Date: Jun 7 2022  
Solvent: CDCl<sub>3</sub>  
Ambient temperature  
Total 560 repetitions

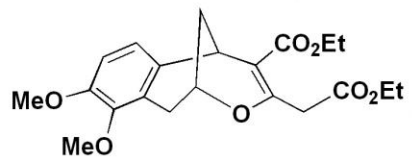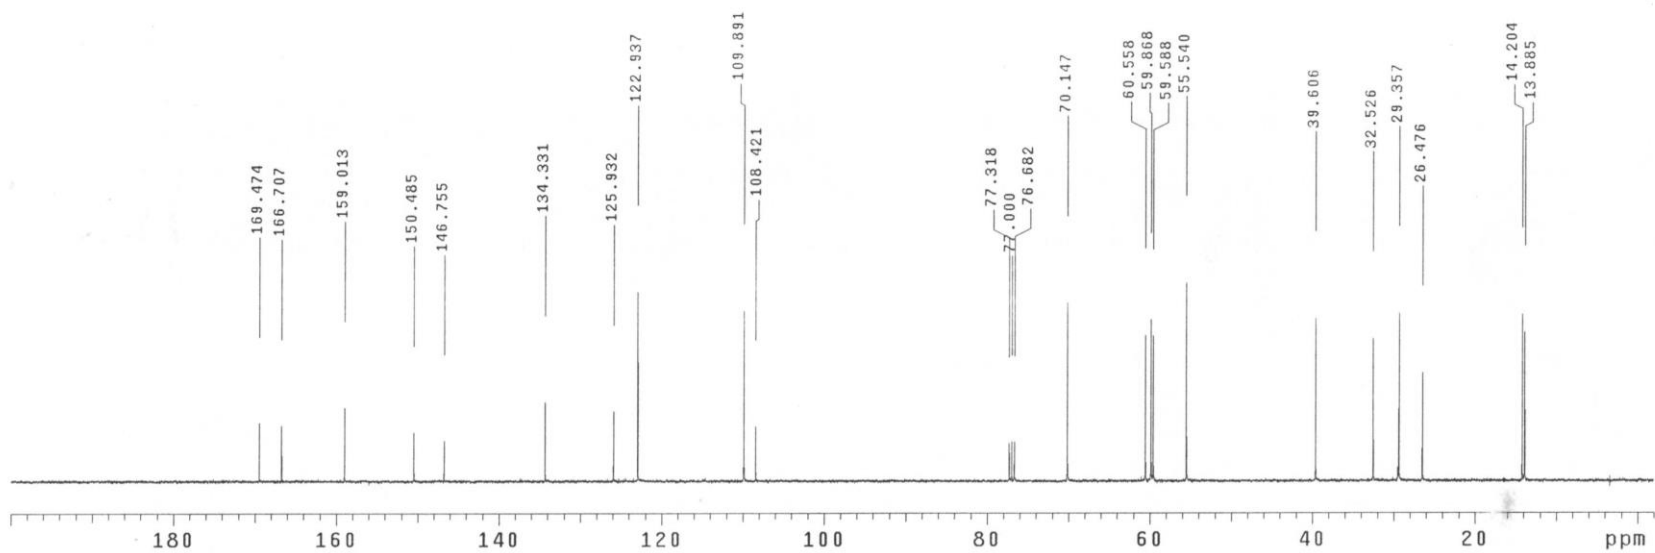

# Compound 6c (<sup>1</sup>H-NMR spectral data)

YNB705

Pulse Sequence: s2pu1

UNITYplus-400 "unity400"

Date: Jul 6 2022

Solvent: CDCl<sub>3</sub>

Ambient temperature

Total 32 repetitions

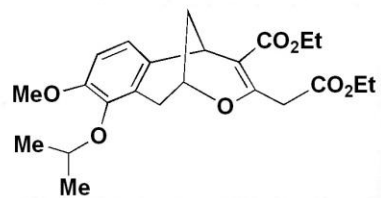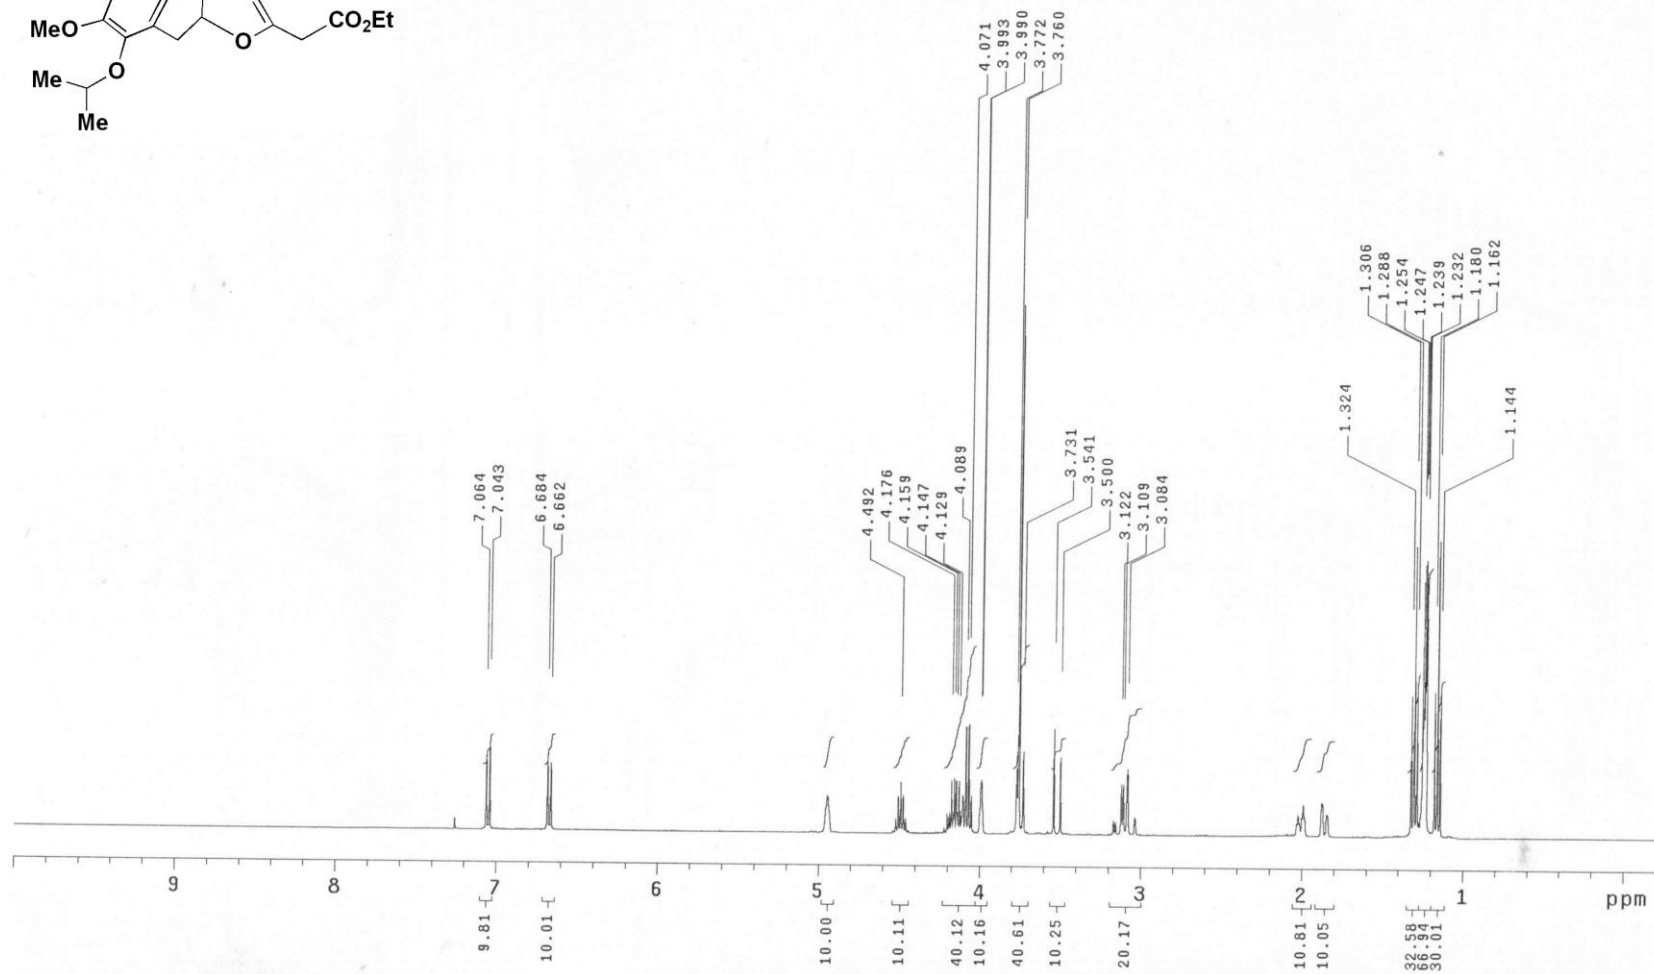

# Compound 6c (<sup>13</sup>C-NMR spectral data)

YNB705

Pulse Sequence: s2pu1

UNITYplus-400 "unity400"

Date: Jul 6 2022

Solvent: CDCl<sub>3</sub>

Ambient temperature

Total 112 repetitions

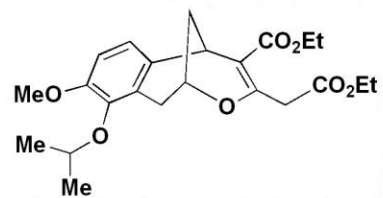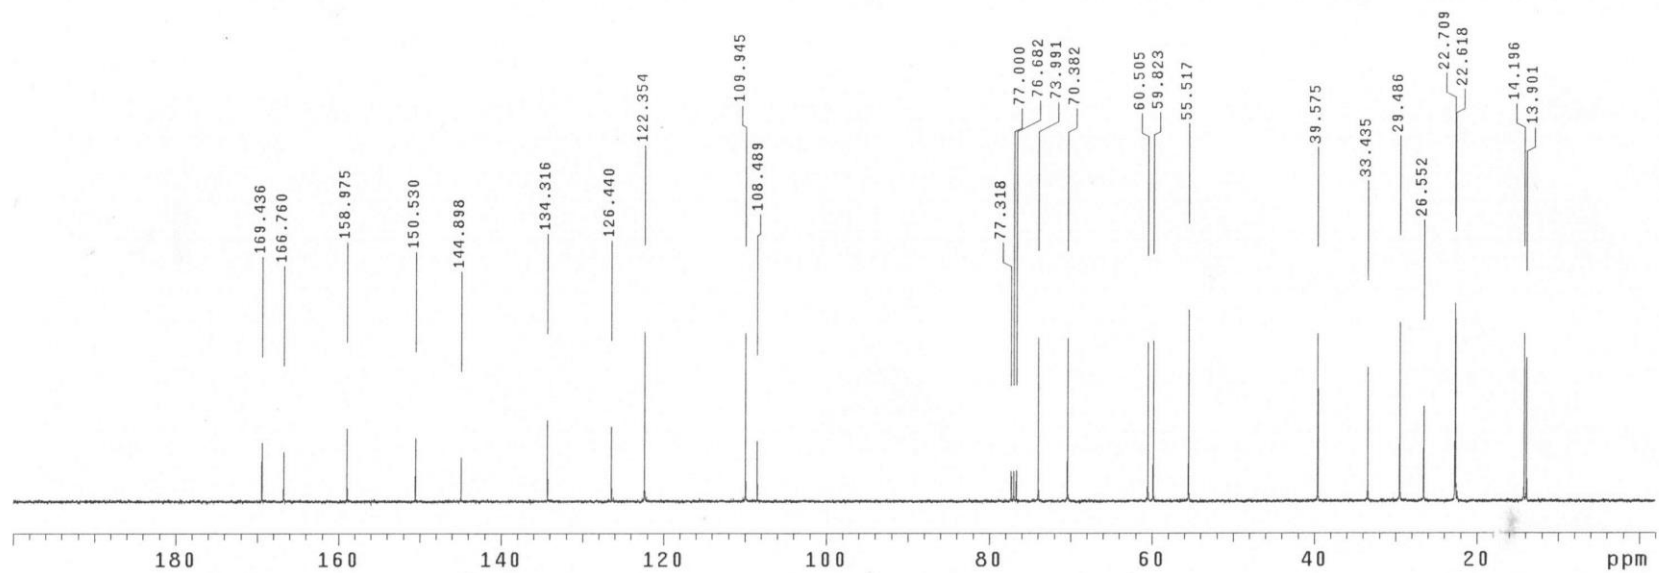

# Compound 6d (<sup>1</sup>H-NMR spectral data)

YNB708

Pulse Sequence: s2pu1  
UNITYplus-400 "unity400"  
Date: Jul 8 2022  
Solvent: CDC13  
Ambient temperature  
Total 32 repetitions

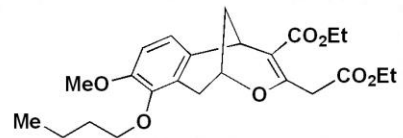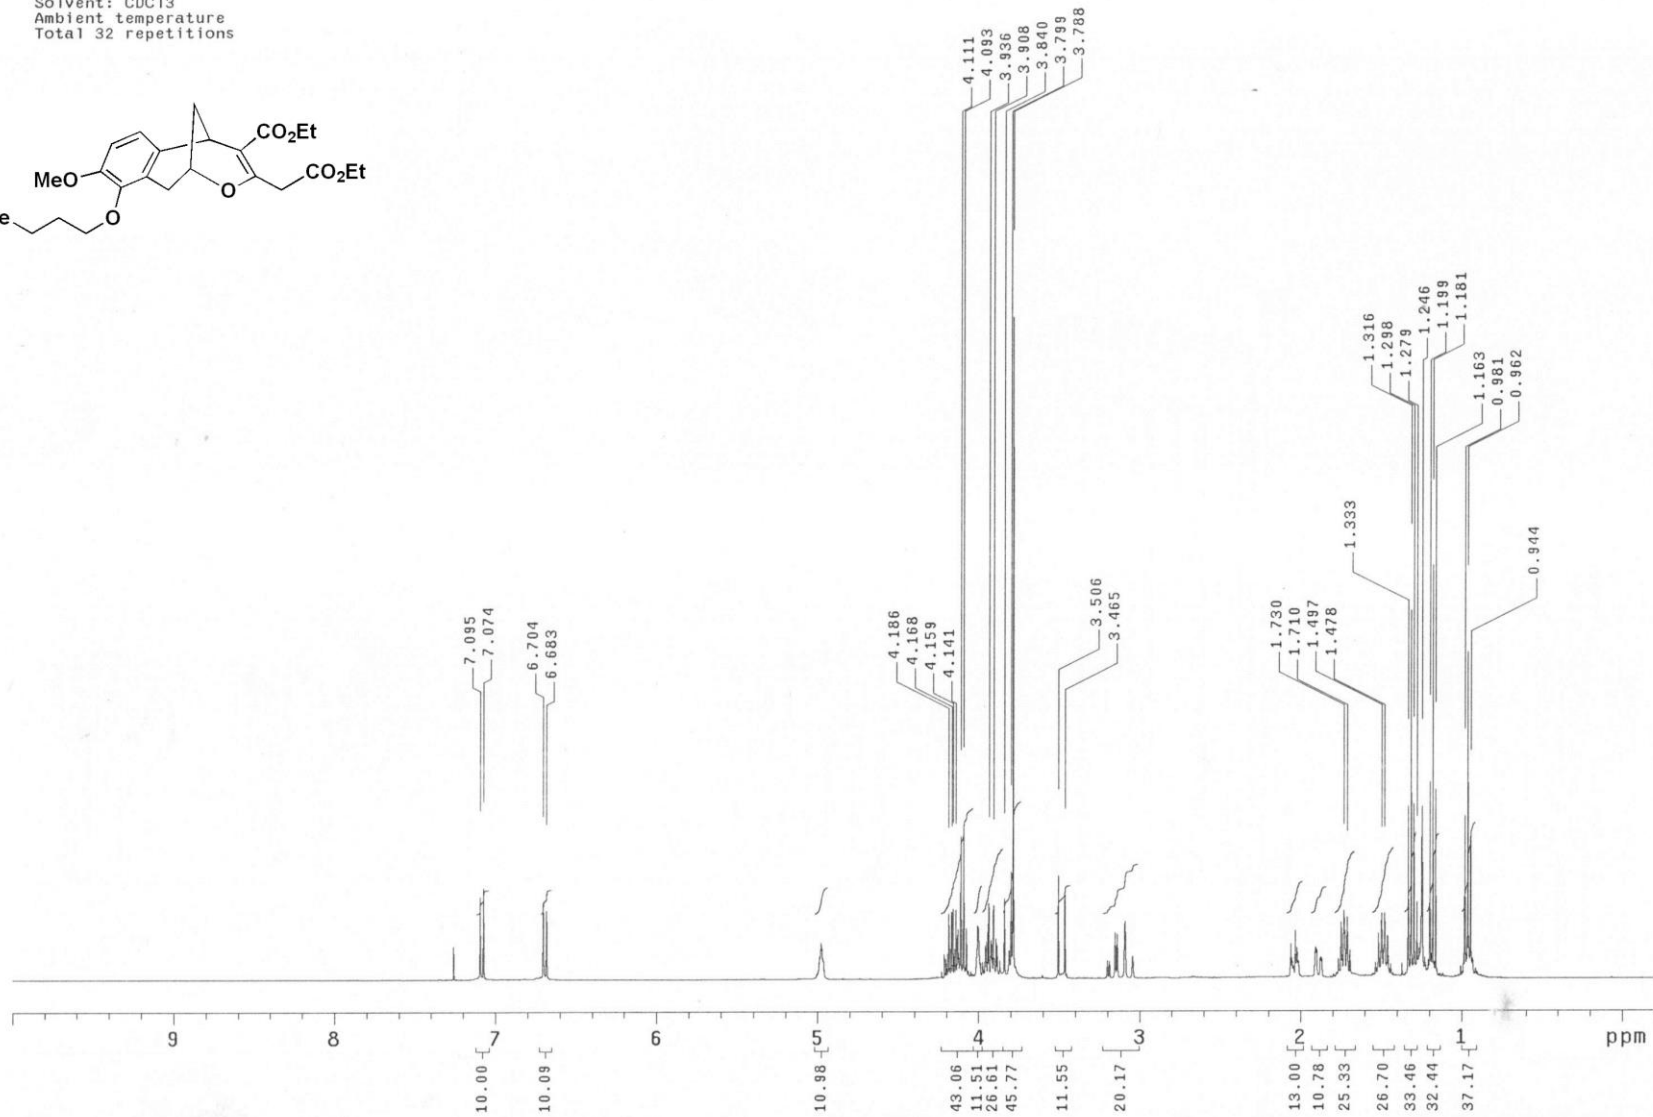



# Compound 6d (<sup>13</sup>C-NMR spectral data)

YNB708

Pulse Sequence: s2pu1

UNITYplus-400 "unity400"

Date: Jul 8 2022

Solvent: CDCl<sub>3</sub>

Ambient temperature

Total 2752 repetitions

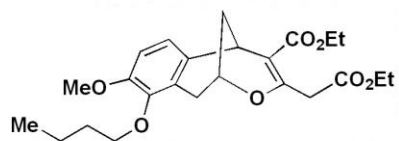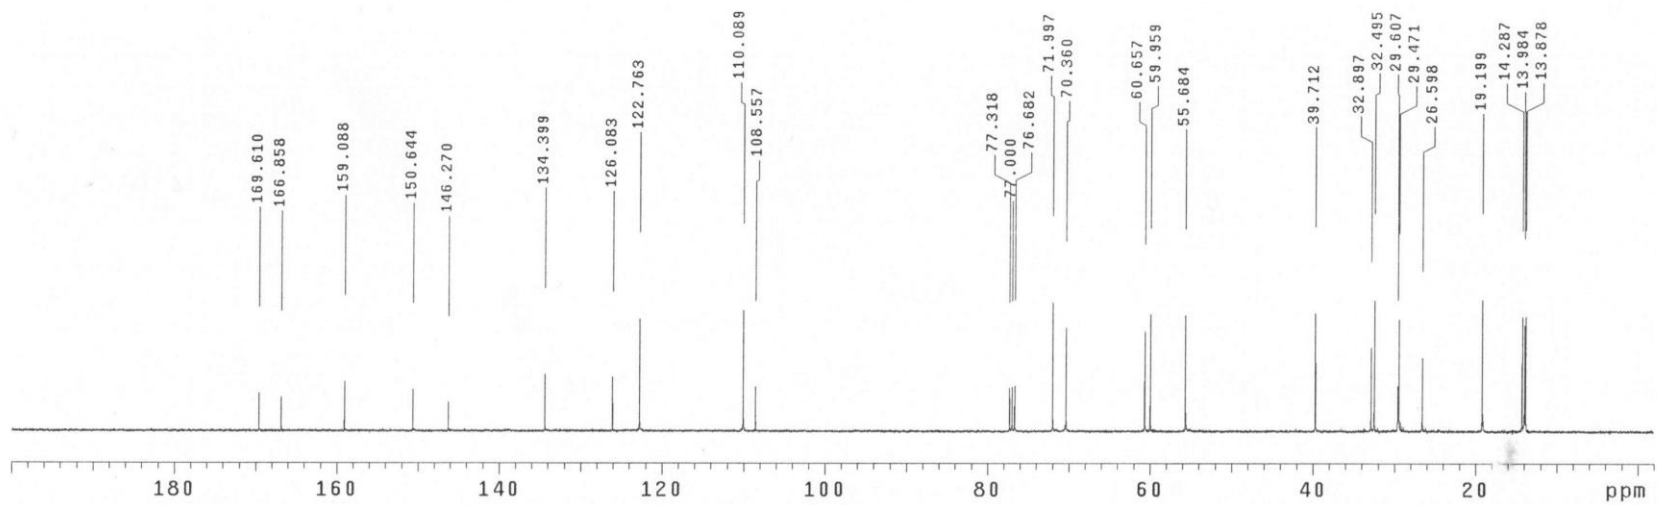

# Compound 6e (<sup>1</sup>H-NMR spectral data)

YNB716

Pulse Sequence: s2pu1

UNITYplus-400 "unity400"

Date: Jul 18 2022

Solvent: CDCl<sub>3</sub>

Ambient temperature

Total 32 repetitions

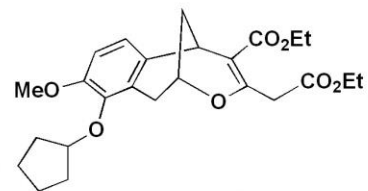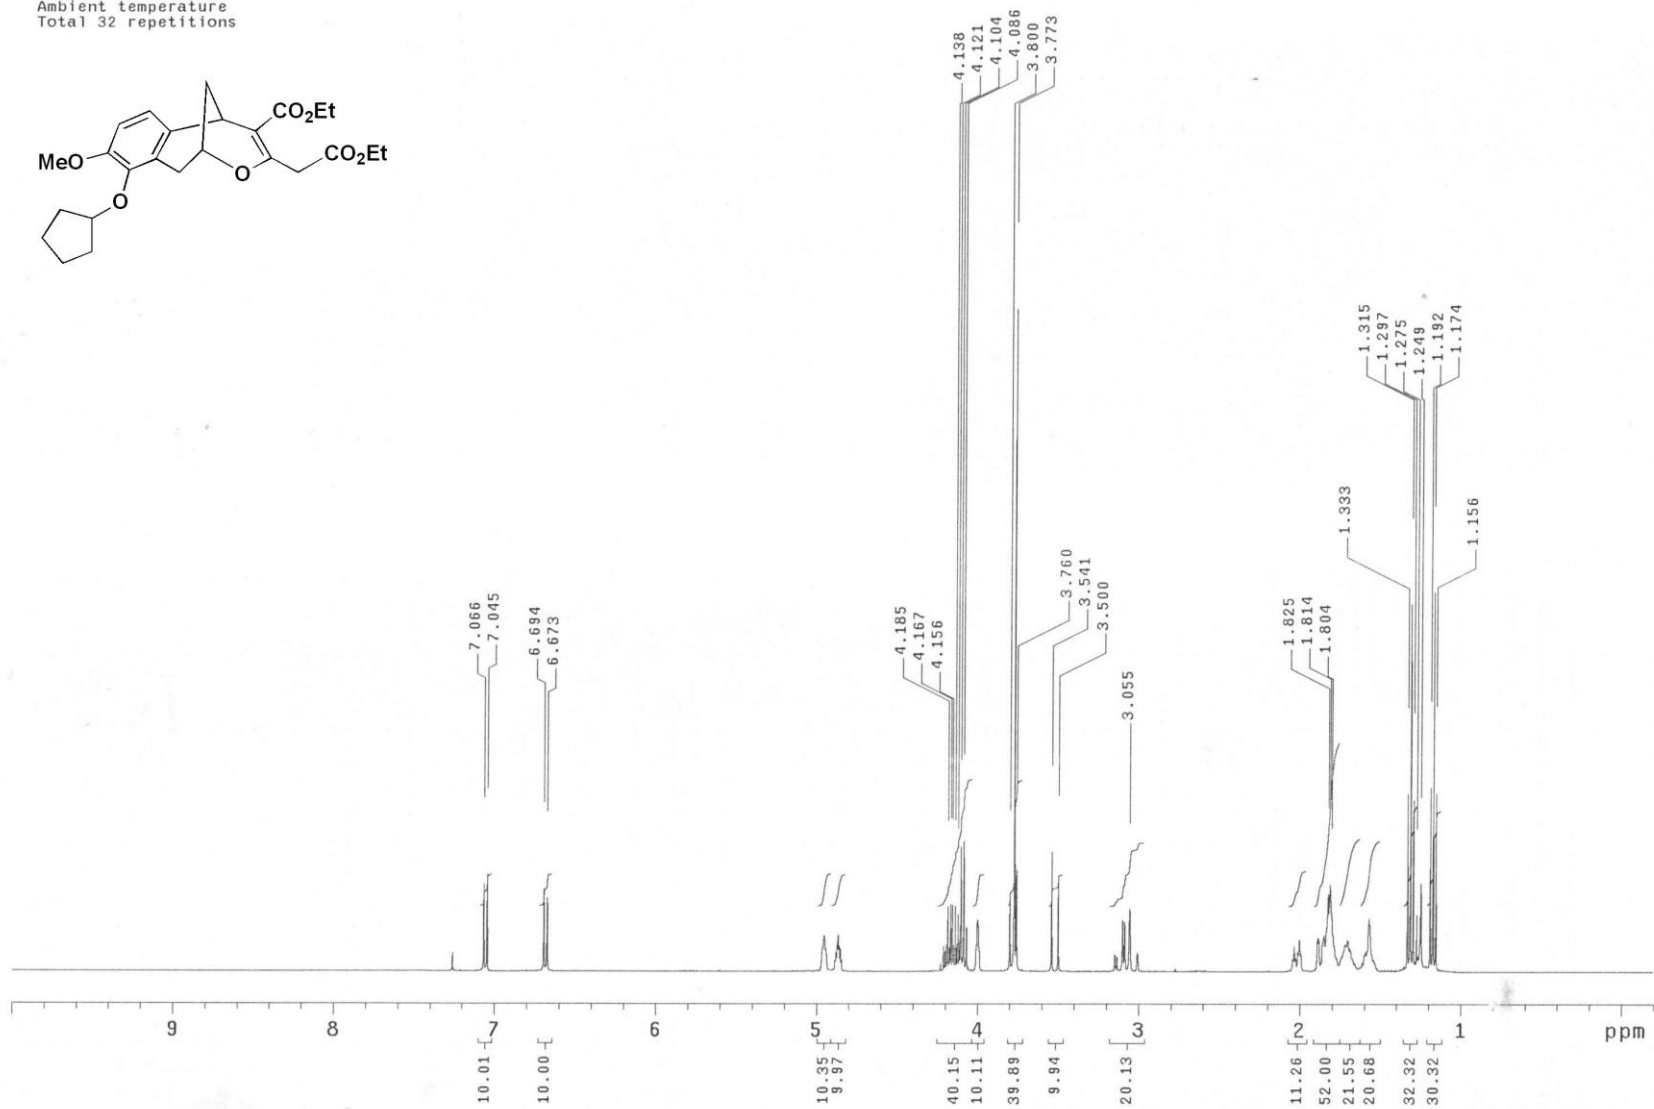

# Compound 6e (<sup>13</sup>C-NMR spectral data)

YNB716

Pulse Sequence: s2pu1  
UNITYplus-400 "unity400"  
Date: Jul 18 2022  
Solvent: CDCl<sub>3</sub>  
Ambient temperature  
Total 224 repetitions

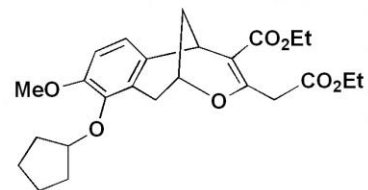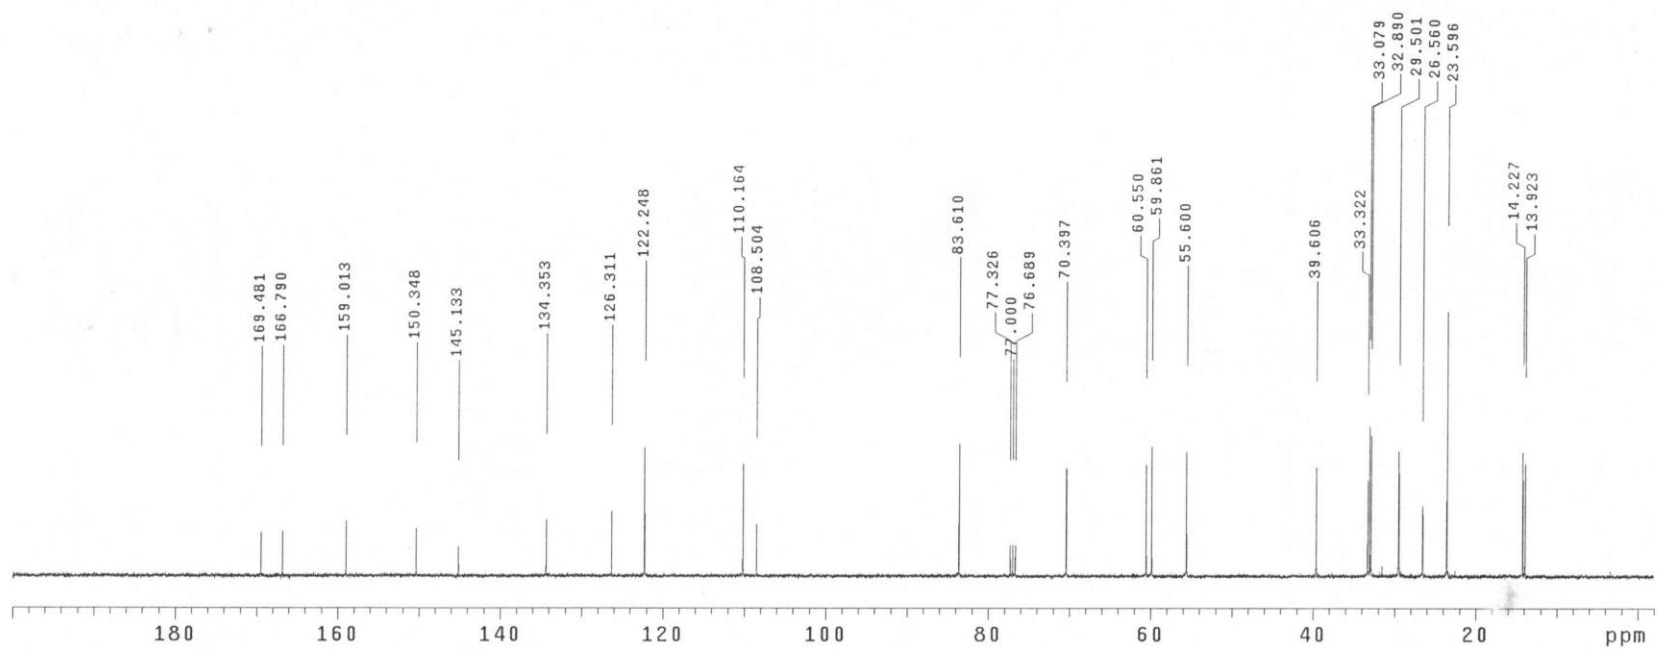

# Compound 6f (<sup>1</sup>H-NMR spectral data)

YNBC713

Pulse Sequence: s2pu1

UNITYplus-400 "unity400"

Date: Jul 14 2022

Solvent: CDCl<sub>3</sub>

Ambient temperature

Total 48 repetitions

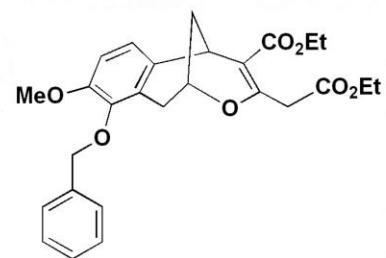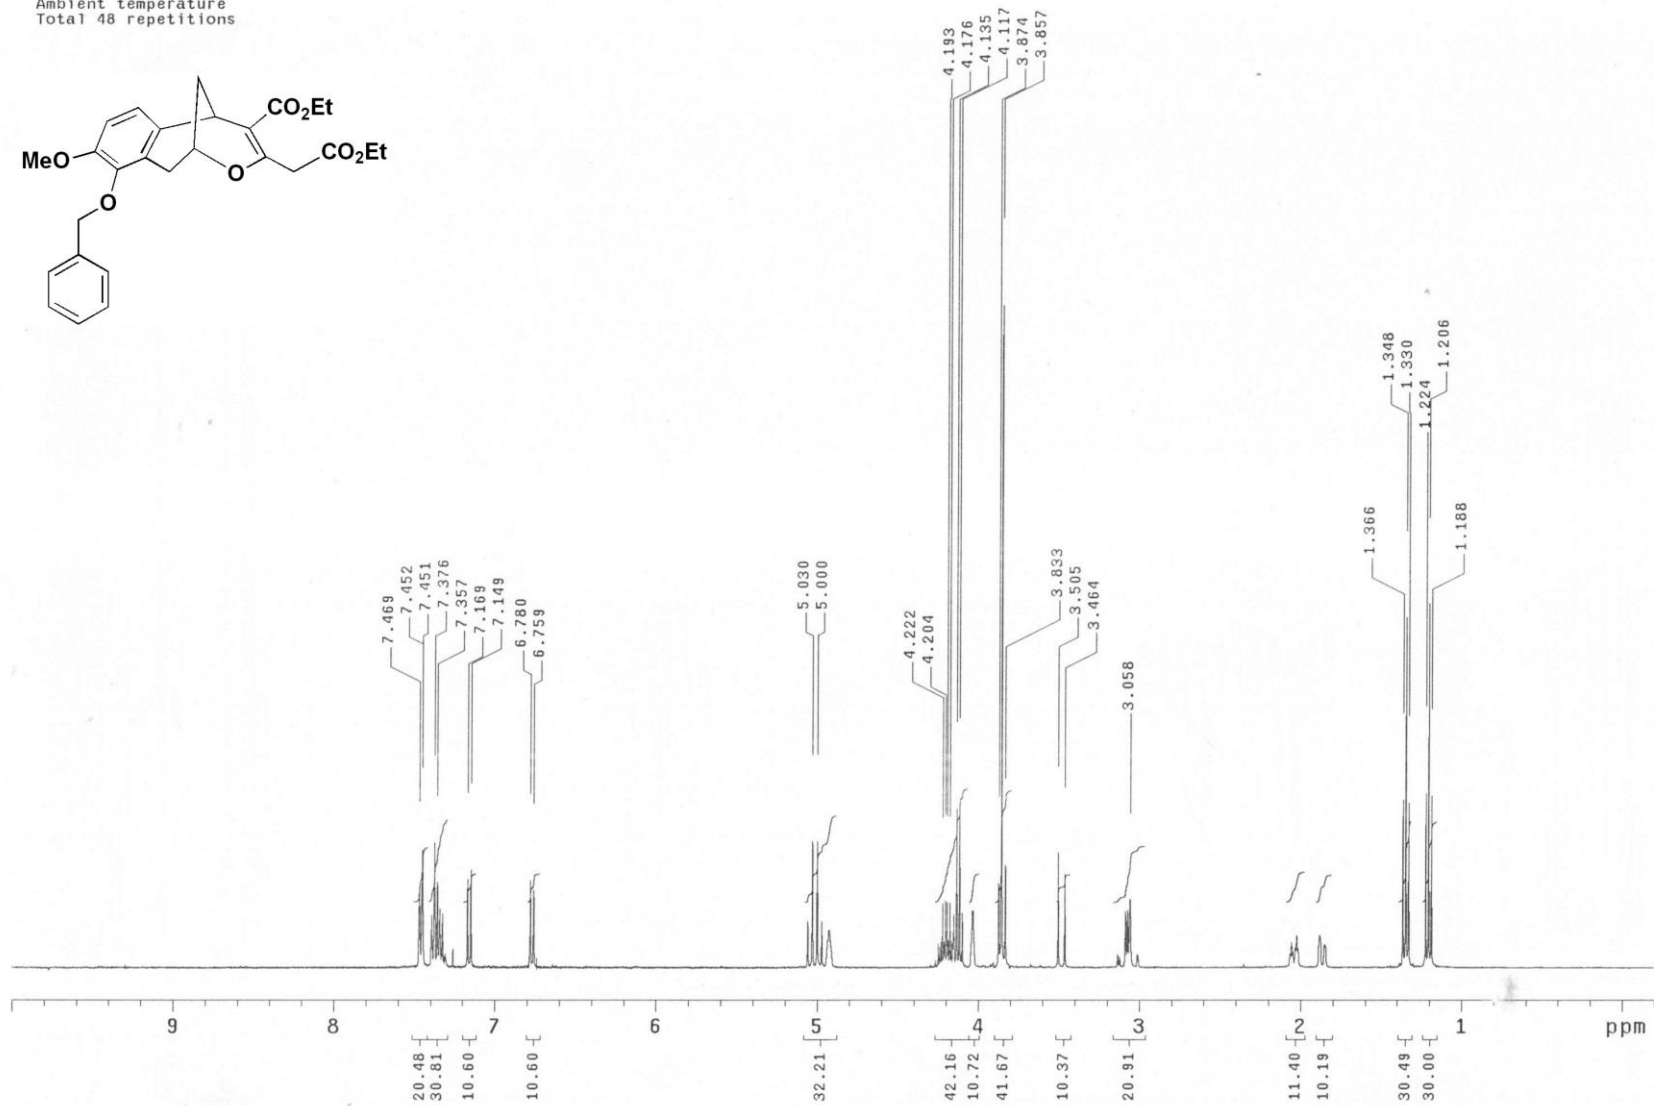

# Compound 6f (<sup>13</sup>C-NMR spectral data)

YNBC713

Pulse Sequence: s2pu1  
UNITYplus-400 "unity400"  
Date: Jul 14 2022  
Solvent: CDC13  
Ambient temperature  
Total 256 repetitions

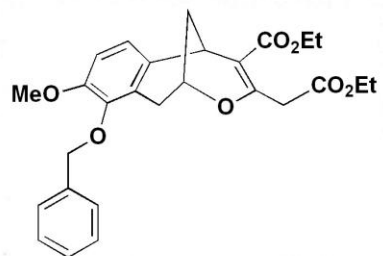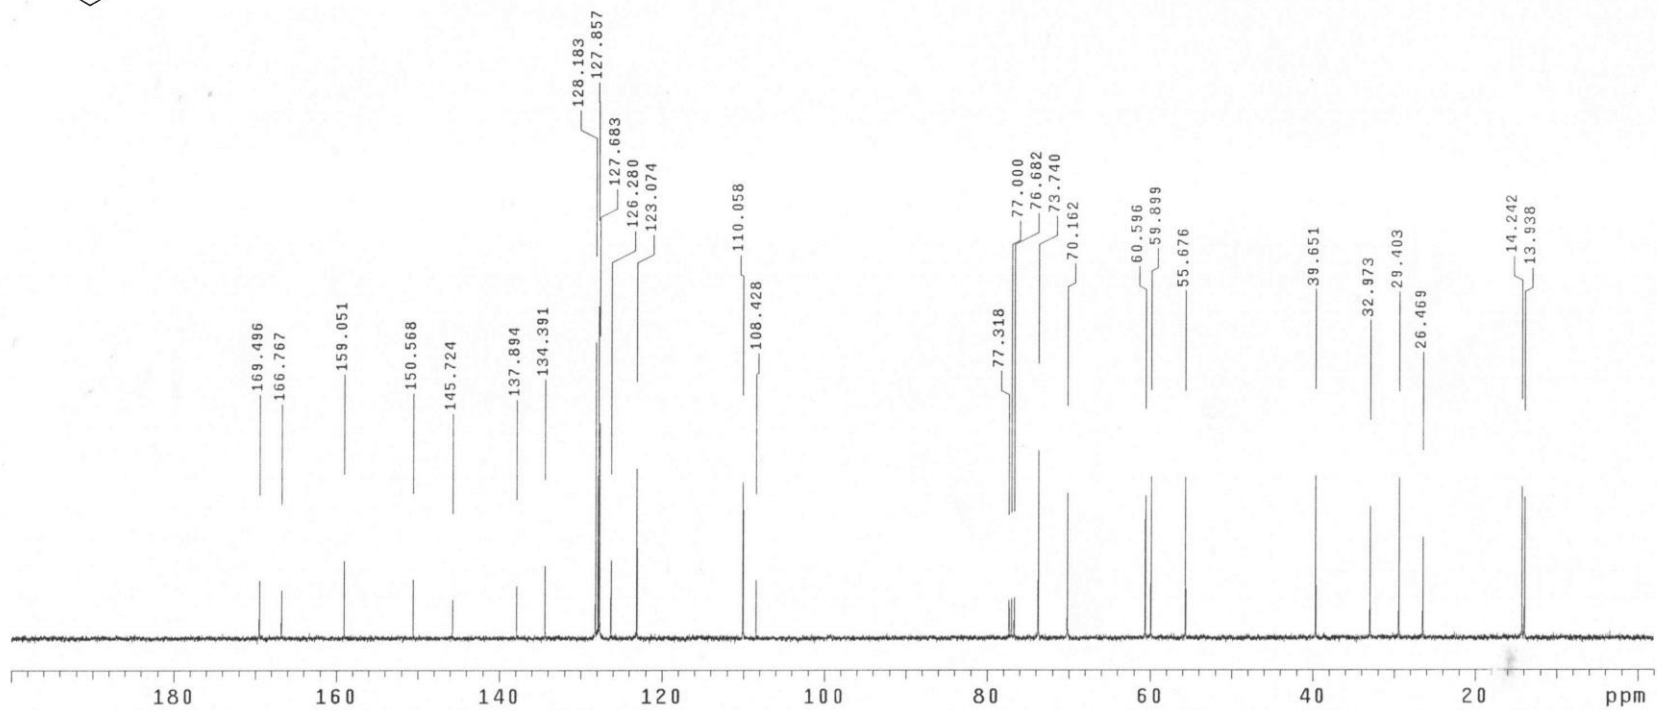

# Compound 6g (<sup>1</sup>H-NMR spectral data)

YNB715

Pulse Sequence: s2pu1  
 UNITYplus-400 "unity400"  
 Date: Jul 18 2022  
 Solvent: CDCl<sub>3</sub>  
 Ambient temperature  
 Total 32 repetitions

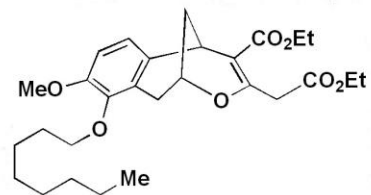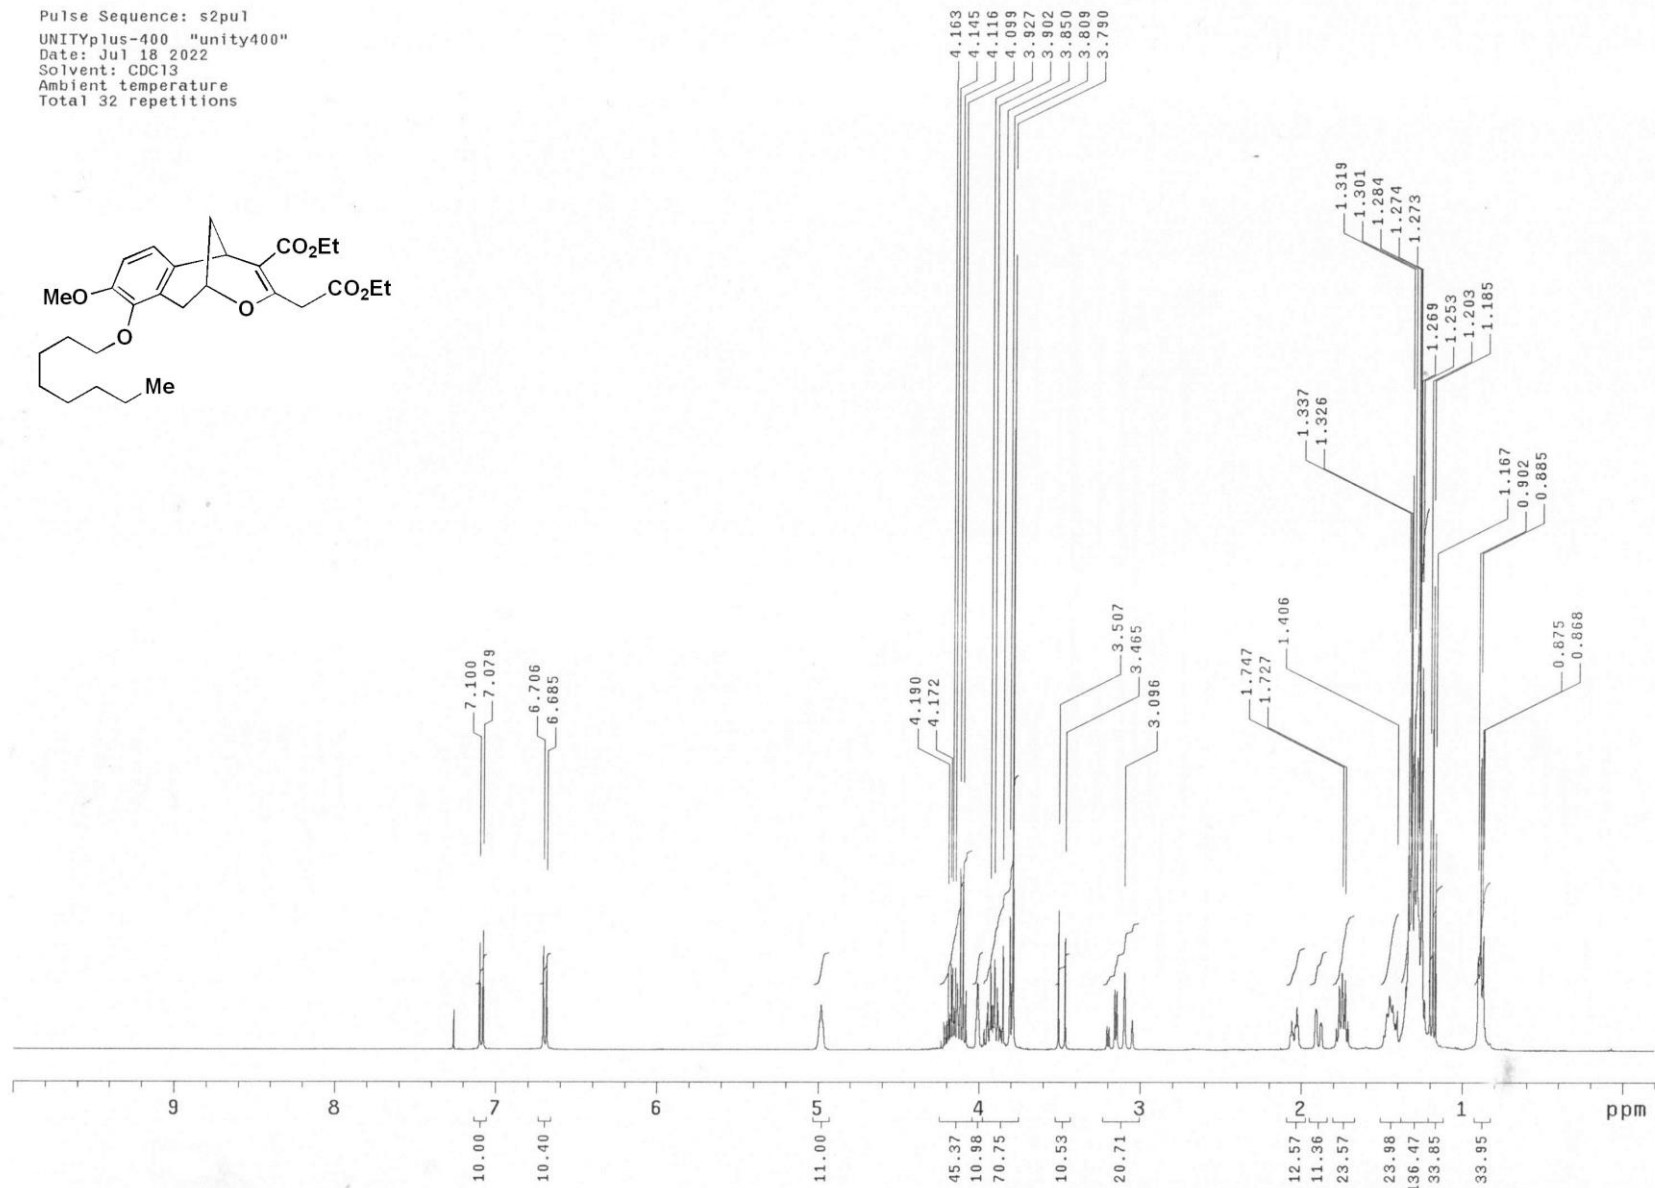

# Compound 6g (<sup>13</sup>C-NMR spectral data)

YNB715

Pulse Sequence: s2pu1  
UNITYplus-400 "unity400"  
Date: Jul 18 2022  
Solvent: CDCl<sub>3</sub>  
Ambient temperature  
Total 656 repetitions

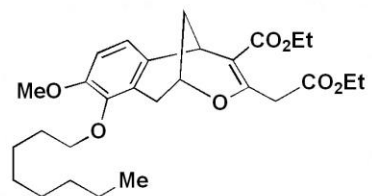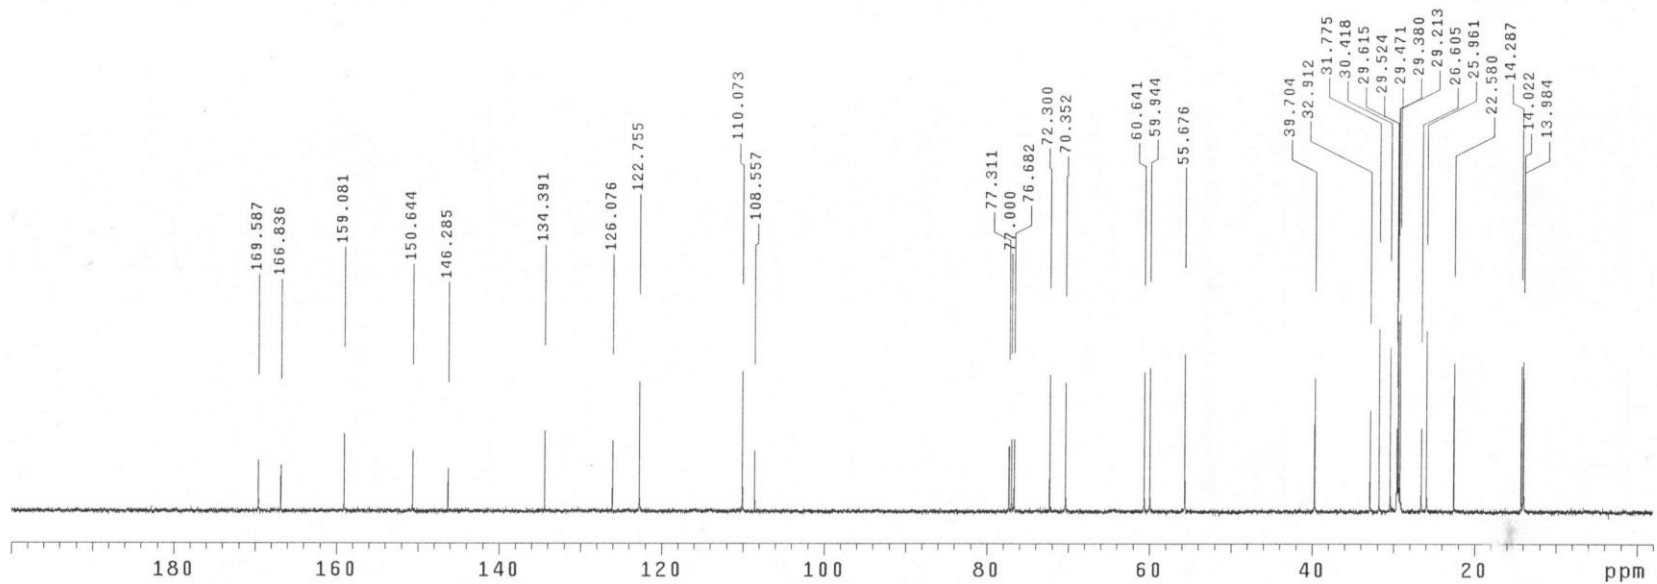

# Compound 6h (<sup>1</sup>H-NMR spectral data)

YNB719

Pulse Sequence: s2pu1

UNITYplus-400 "unity400"

Date: Jul 20 2022

Solvent: CDCl<sub>3</sub>

Ambient temperature

Total 32 repetitions

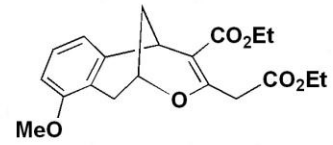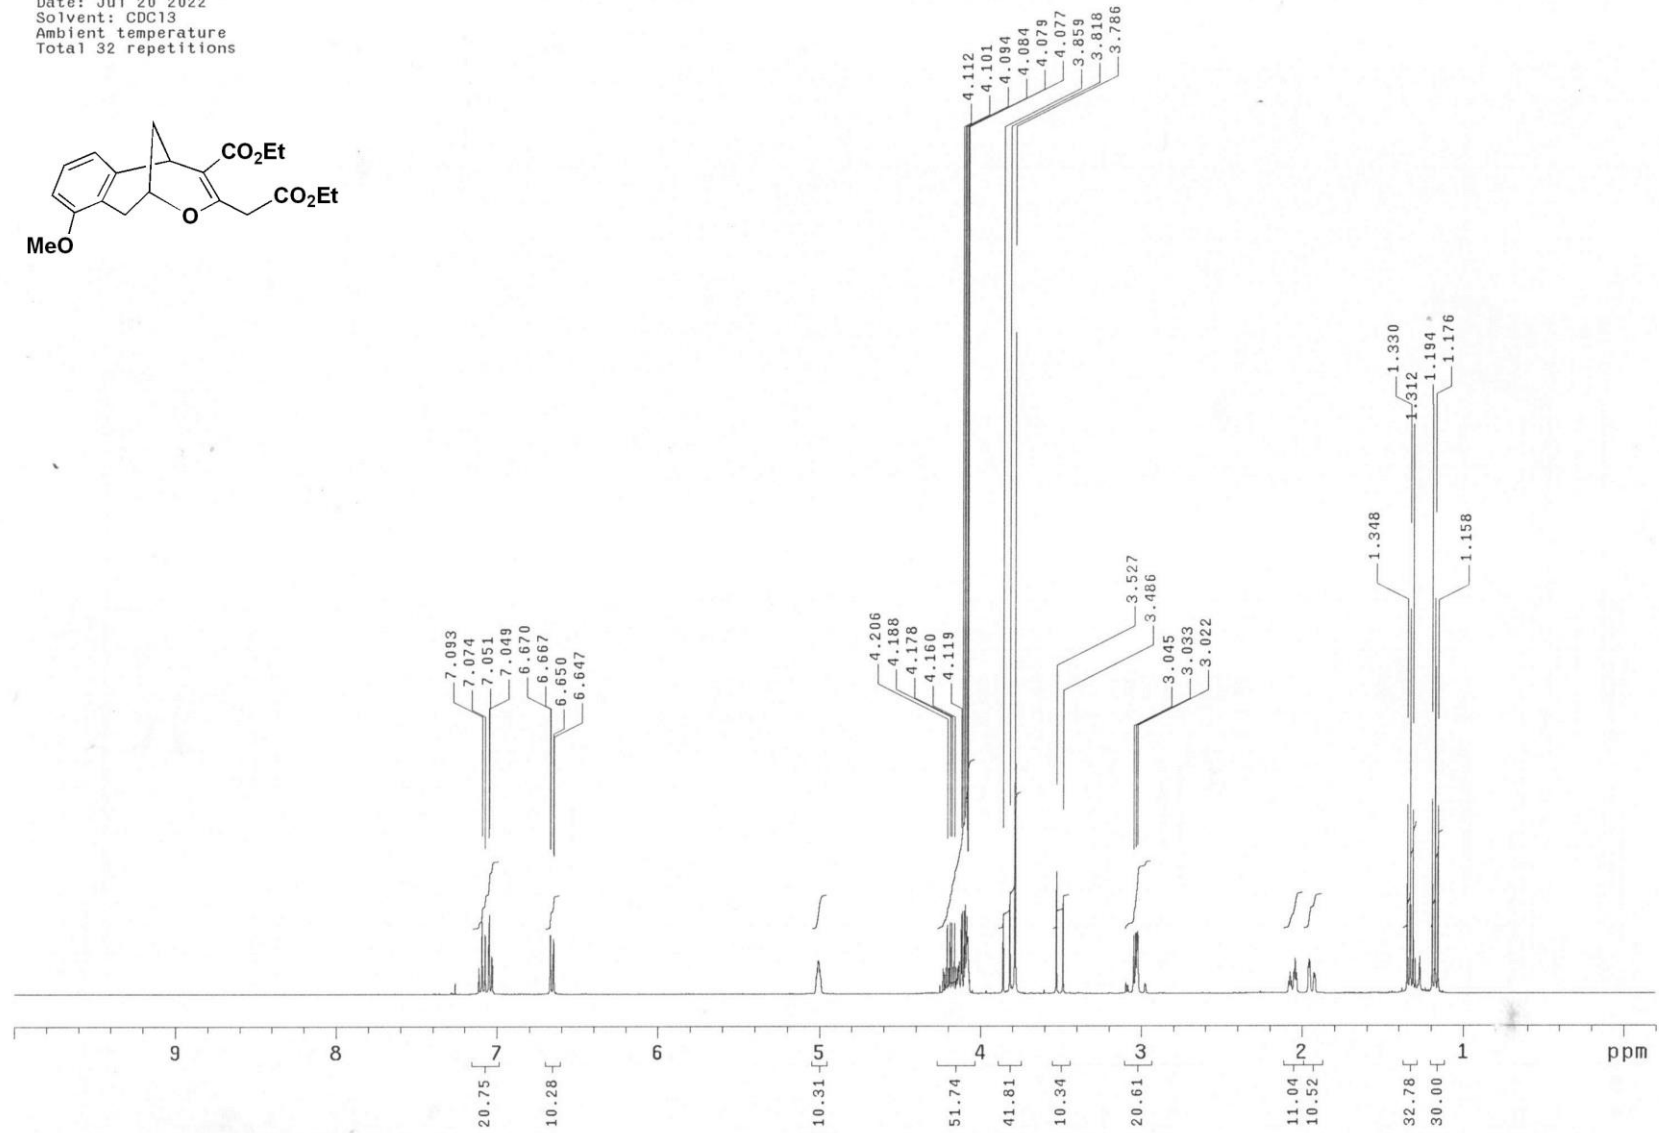



# Compound 6h (<sup>13</sup>C-NMR spectral data)

YNB719

Pulse Sequence: s2pu1

UNITYplus-400 "unity400"

Date: Jul 20 2022

Solvent: CDCl<sub>3</sub>

Ambient temperature

Total 128 repetitions

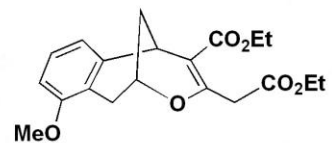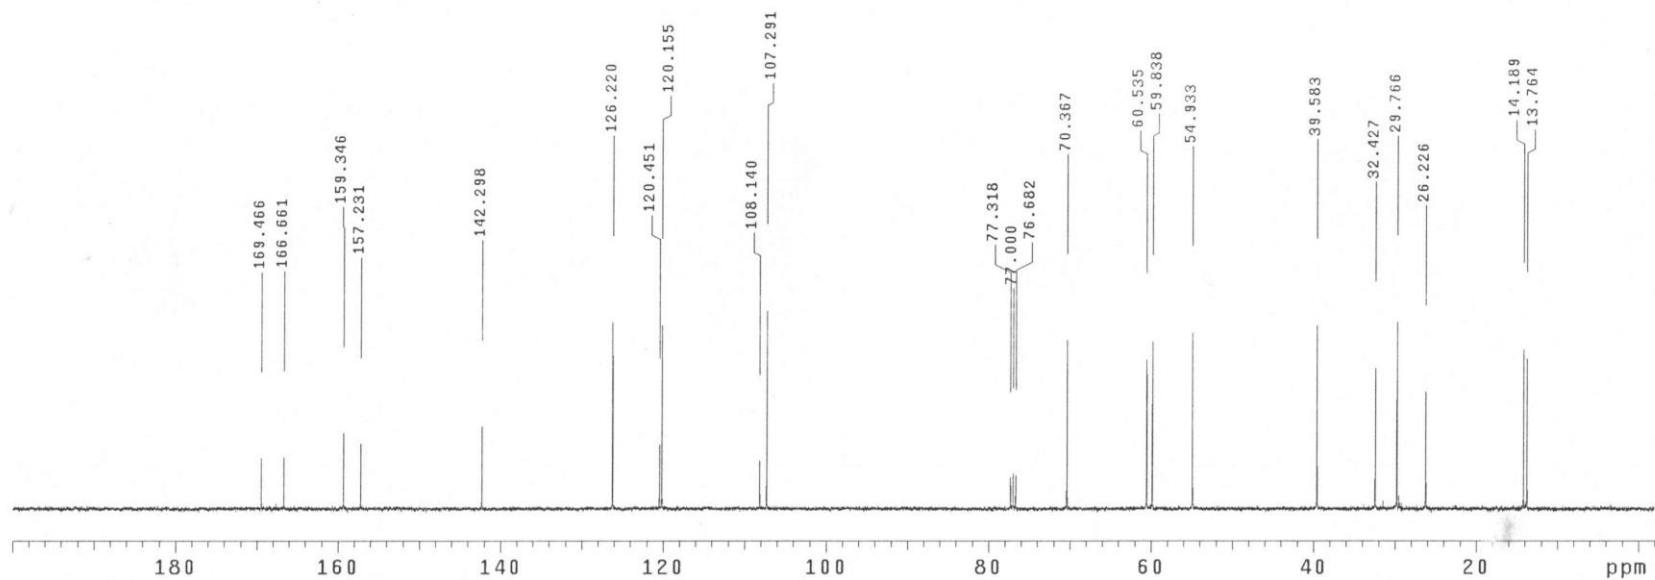

# Compound 6i (<sup>1</sup>H-NMR spectral data)

YNB725

Pulse Sequence: s2pu1

UNITYplus-400 "unity400"

Date: Jul 27 2022

Solvent: CDCl<sub>3</sub>

Ambient temperature

Total 32 repetitions

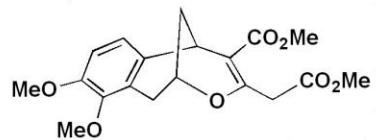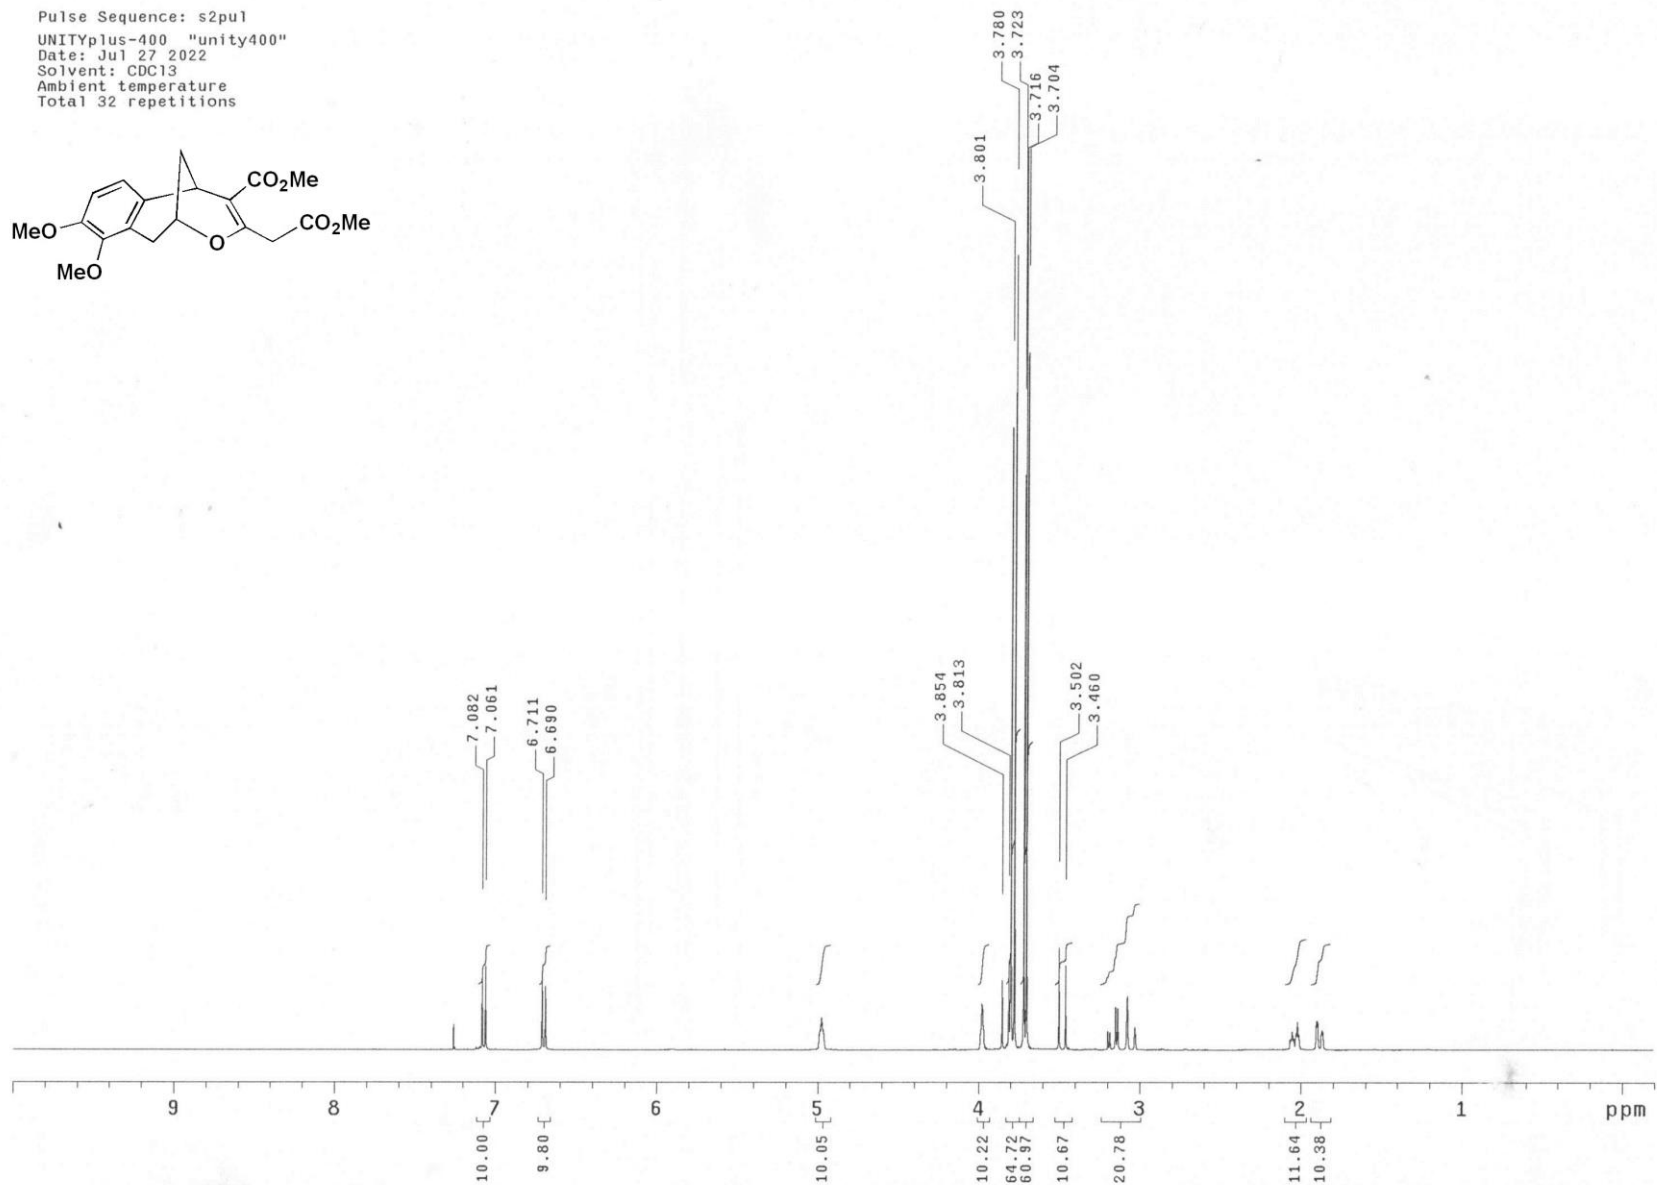

# Compound 6i (<sup>13</sup>C-NMR spectral data)

YNB725

Pulse Sequence: s2pu1

UNITYplus-400 "unity400"

Date: Jul 27 2022

Solvent: CDCl<sub>3</sub>

Ambient temperature

Total 2528 repetitions

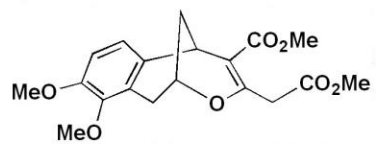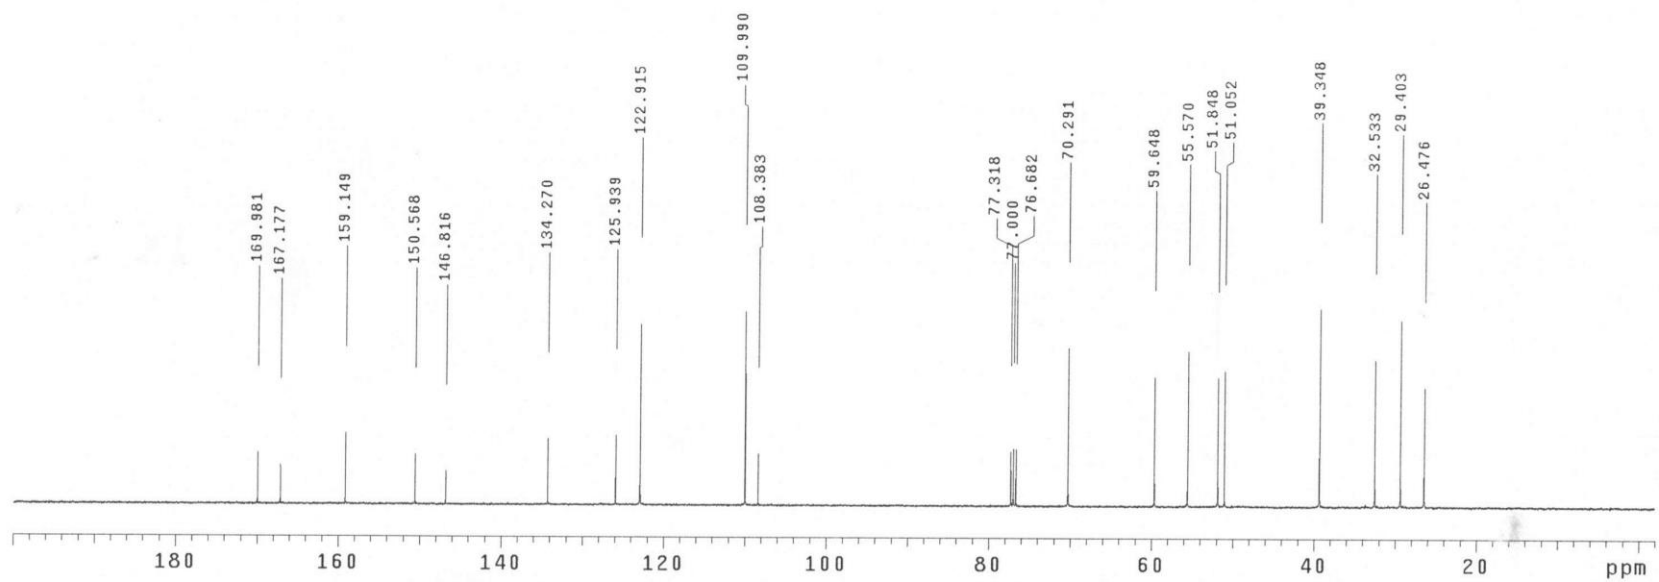

# Compound 6j (<sup>1</sup>H-NMR spectral data)

YNB815

Pulse Sequence: s2pu1  
UNITYplus-400 "unity400"  
Date: Feb 6 2023  
Solvent: CDCl<sub>3</sub>  
Ambient temperature  
Total 32 repetitions

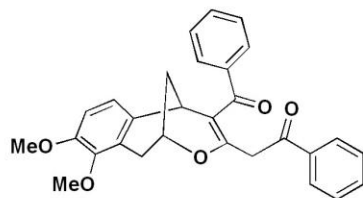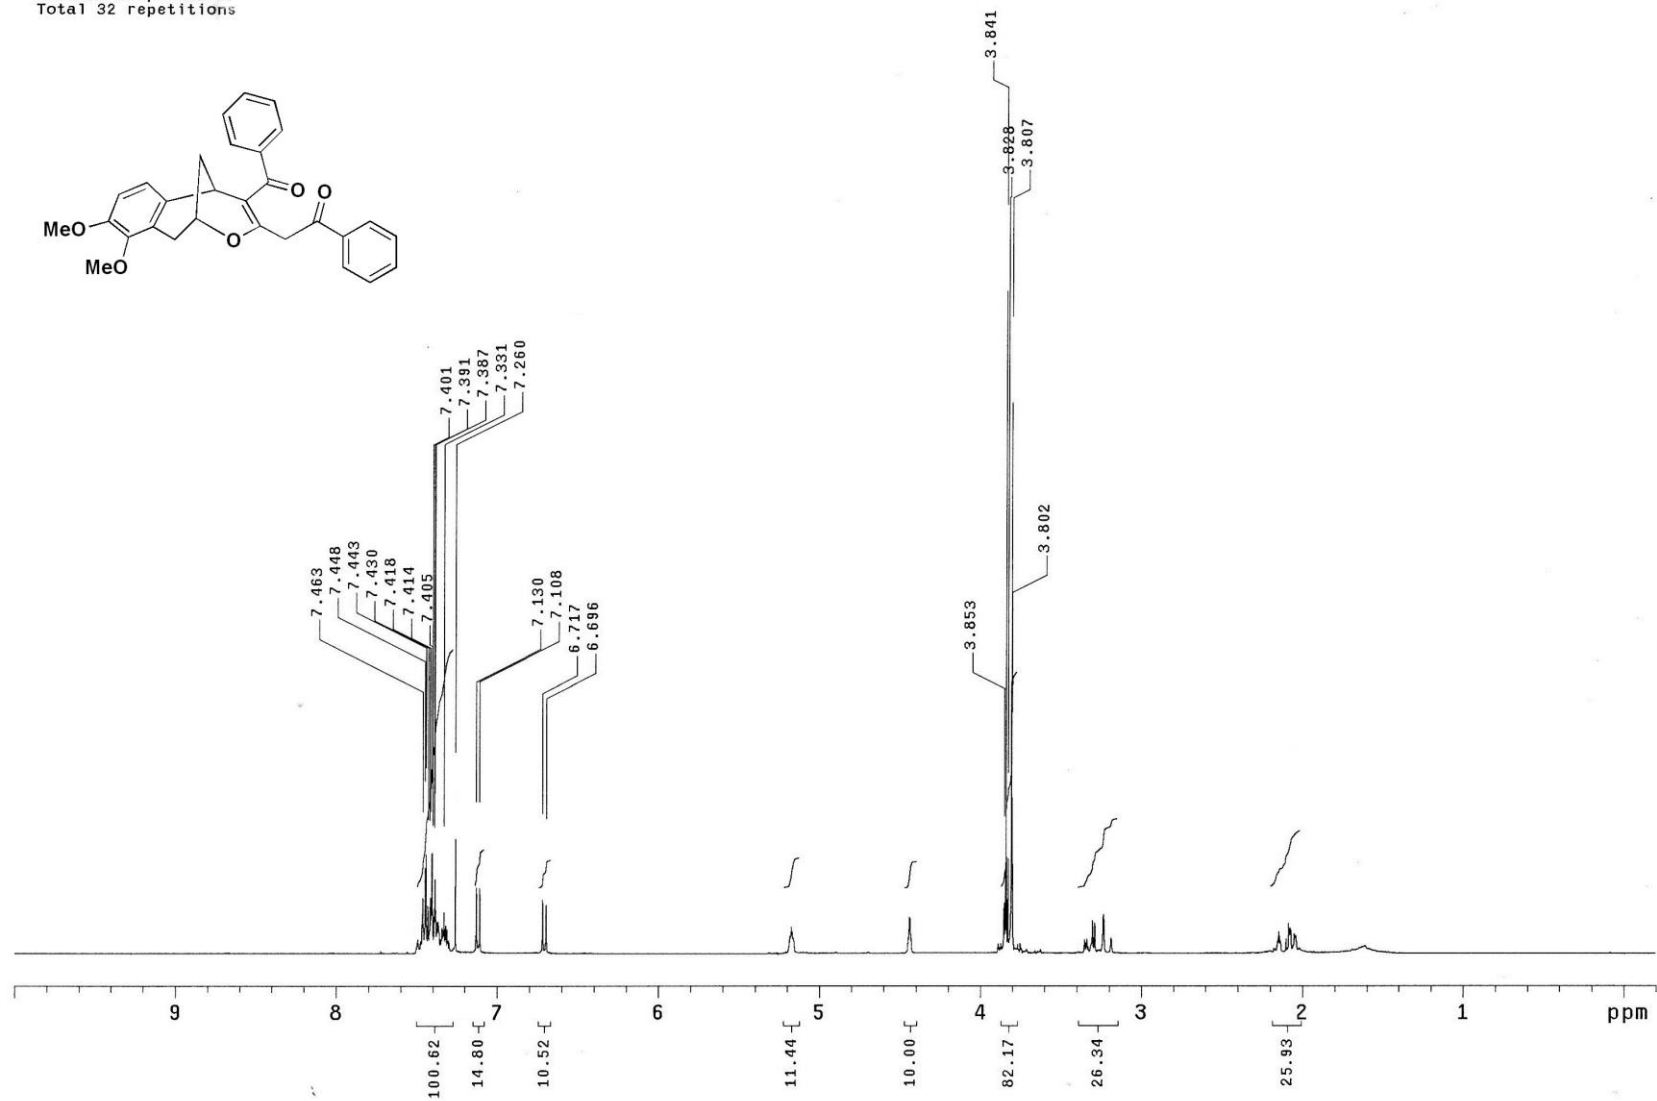

# Compound 6j (<sup>13</sup>C-NMR spectral data)

YNB815

Pulse Sequence: s2pu1

UNITYplus-400 "unity400"

Date: Feb 6 2023

Solvent: CDC13

Ambient temperature

Total 2464 repetitions

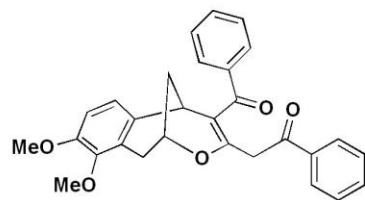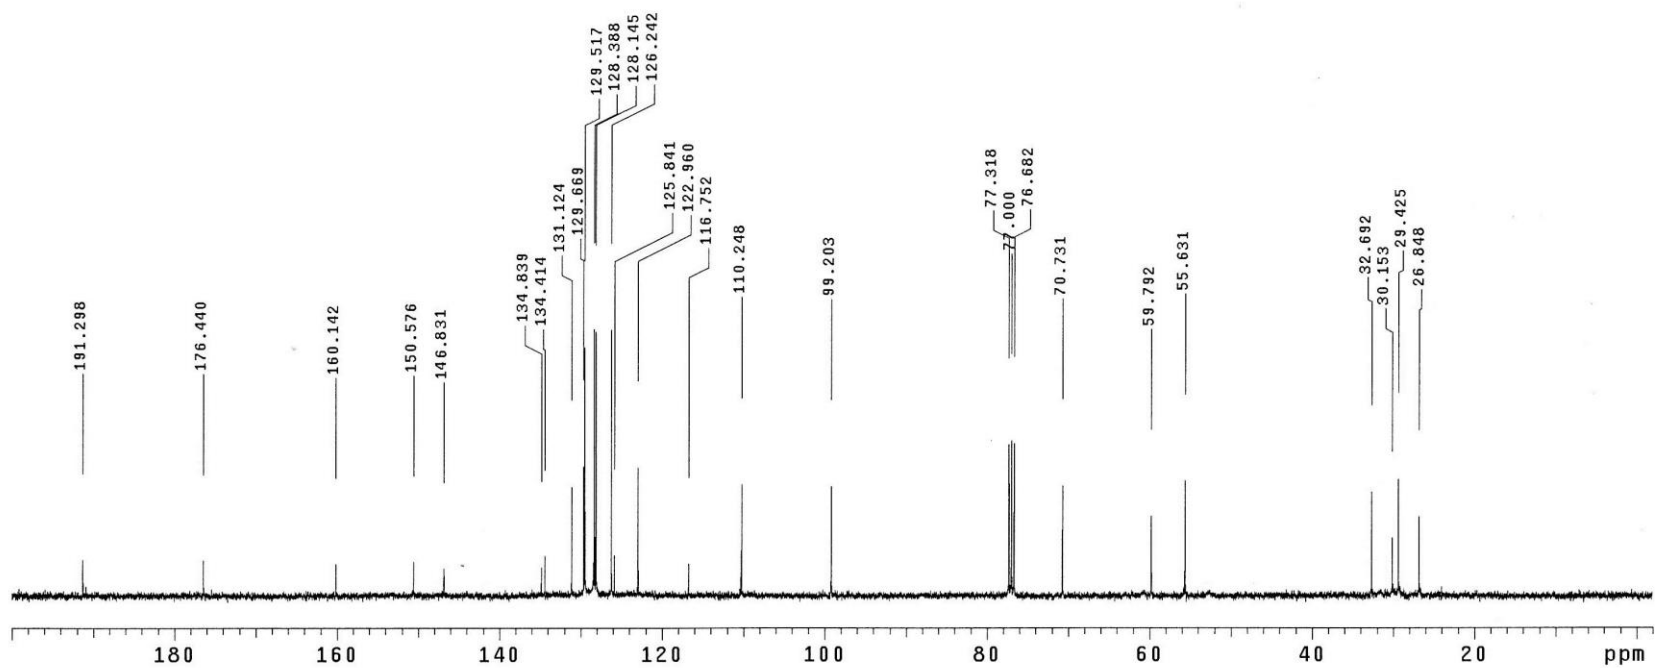

# Compound 6k (<sup>1</sup>H-NMR spectral data)

YN8810

Pulse Sequence: s2pu1  
UNITYplus-400 "unity400"  
Date: Aug 11 2022  
Solvent: CDCl<sub>3</sub>  
Ambient temperature  
Total 32 repetitions

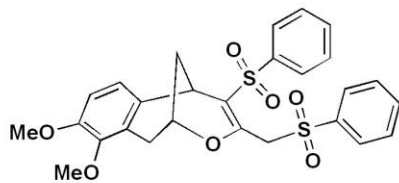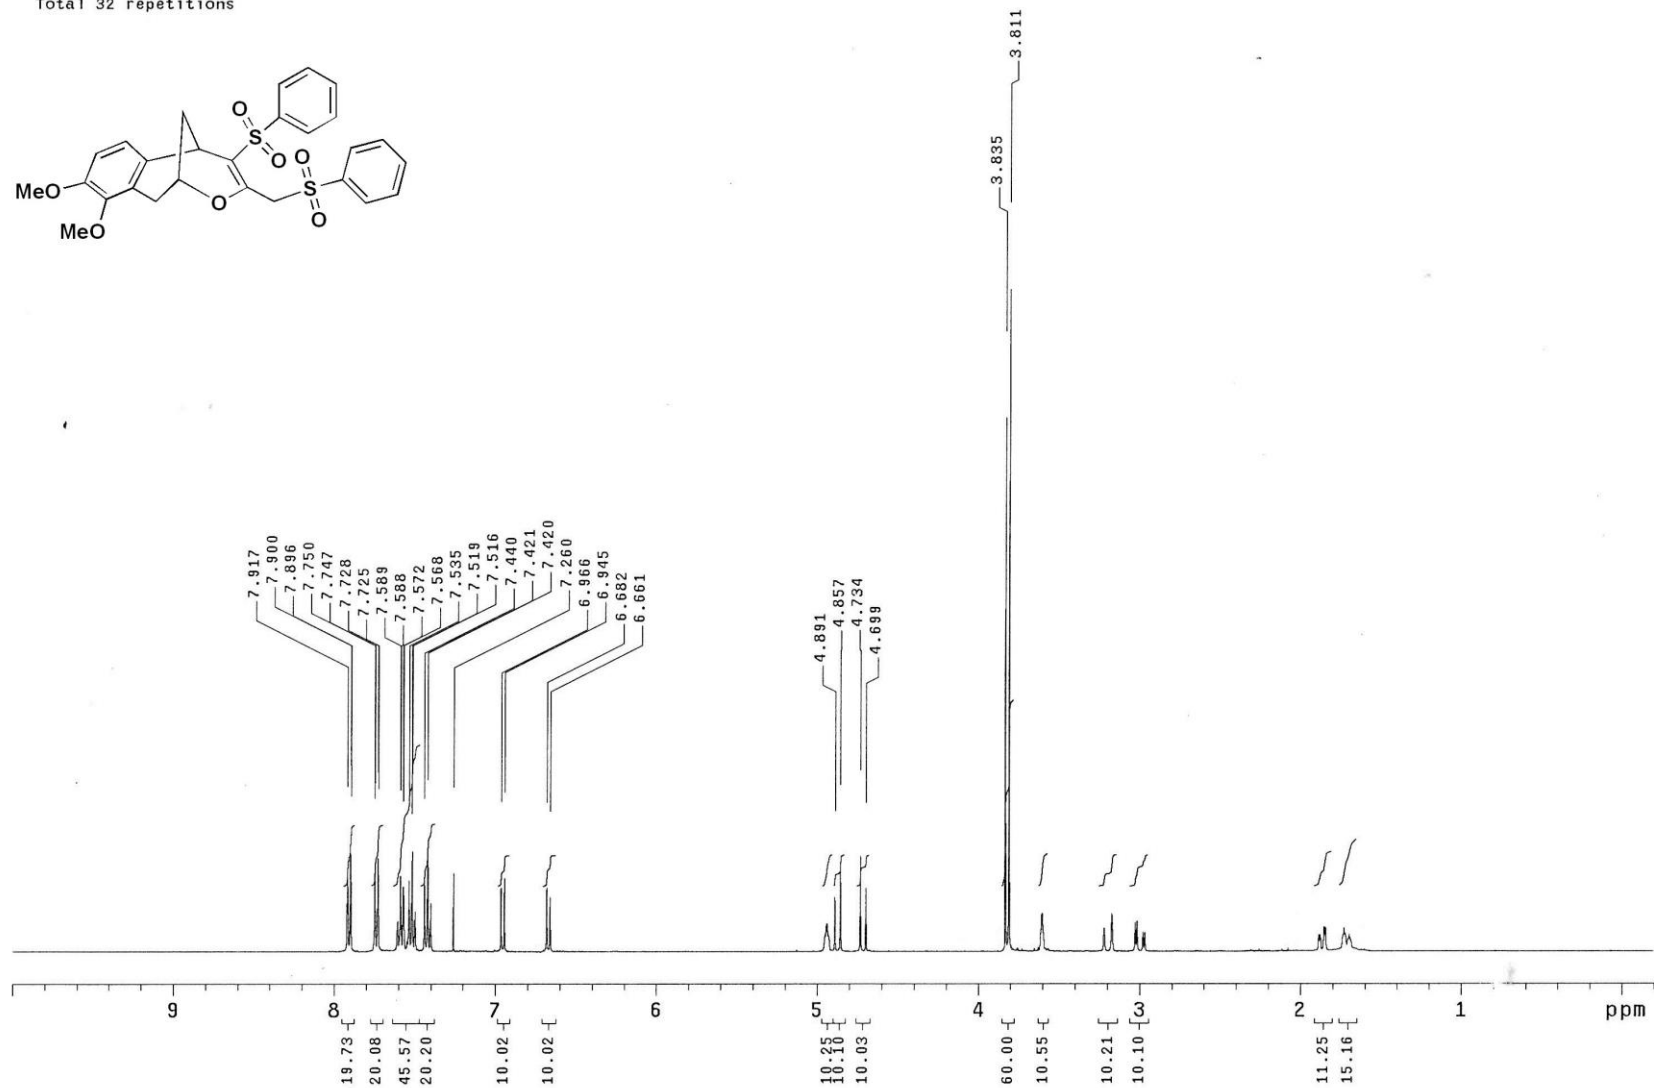

# Compound 6k (<sup>13</sup>C-NMR spectral data)

YNB810

Pulse Sequence: s2pu1

UNITYplus-400 "unity400"

Date: Aug 11 2022

Solvent: CDCl<sub>3</sub>

Ambient temperature

Total 2432 repetitions

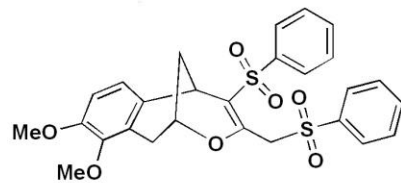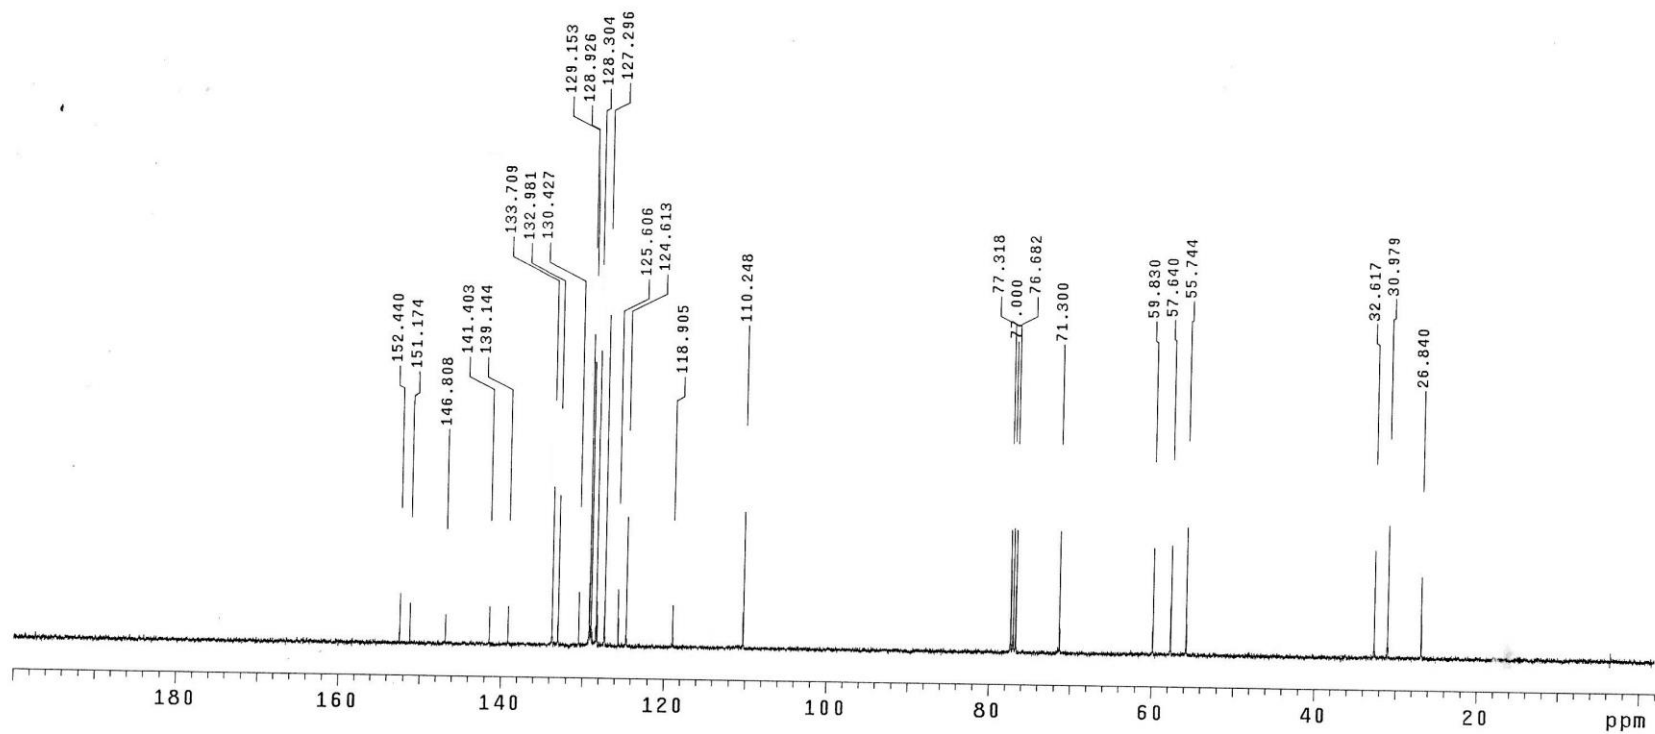

# Compound 6I (<sup>1</sup>H-NMR spectral data)

YNB727

Pulse Sequence: s2pu1  
UNITYplus-400 "unity400"  
Date: Jul 28 2022  
Solvent: CDCl<sub>3</sub>  
Ambient temperature  
Total 32 repetitions

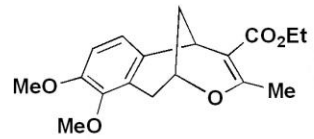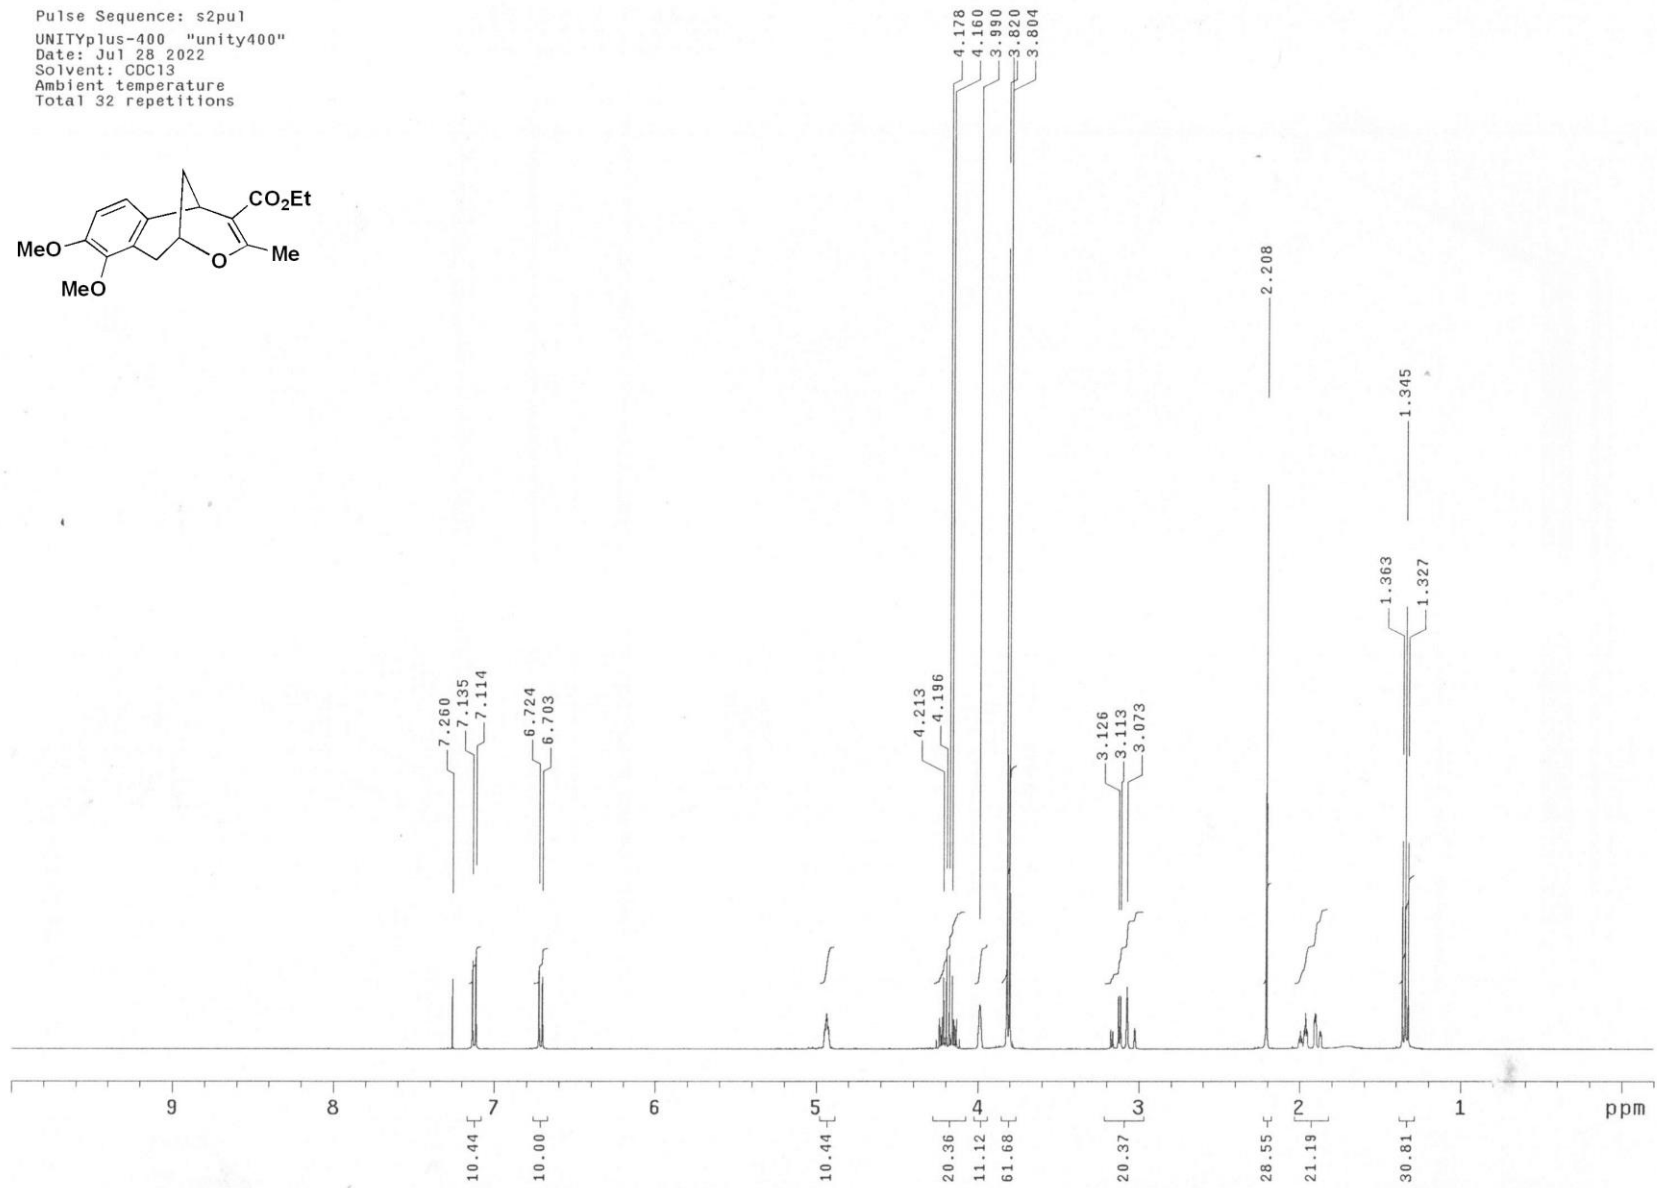



# Compound 6I (<sup>13</sup>C-NMR spectral data)

YNB727

Pulse Sequence: s2pu1

UNITYplus-400 "unity400"

Date: Jul 28 2022

Solvent: CDCl<sub>3</sub>

Ambient temperature

Total 1696 repetitions

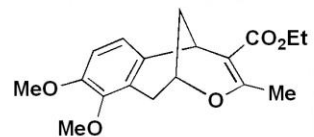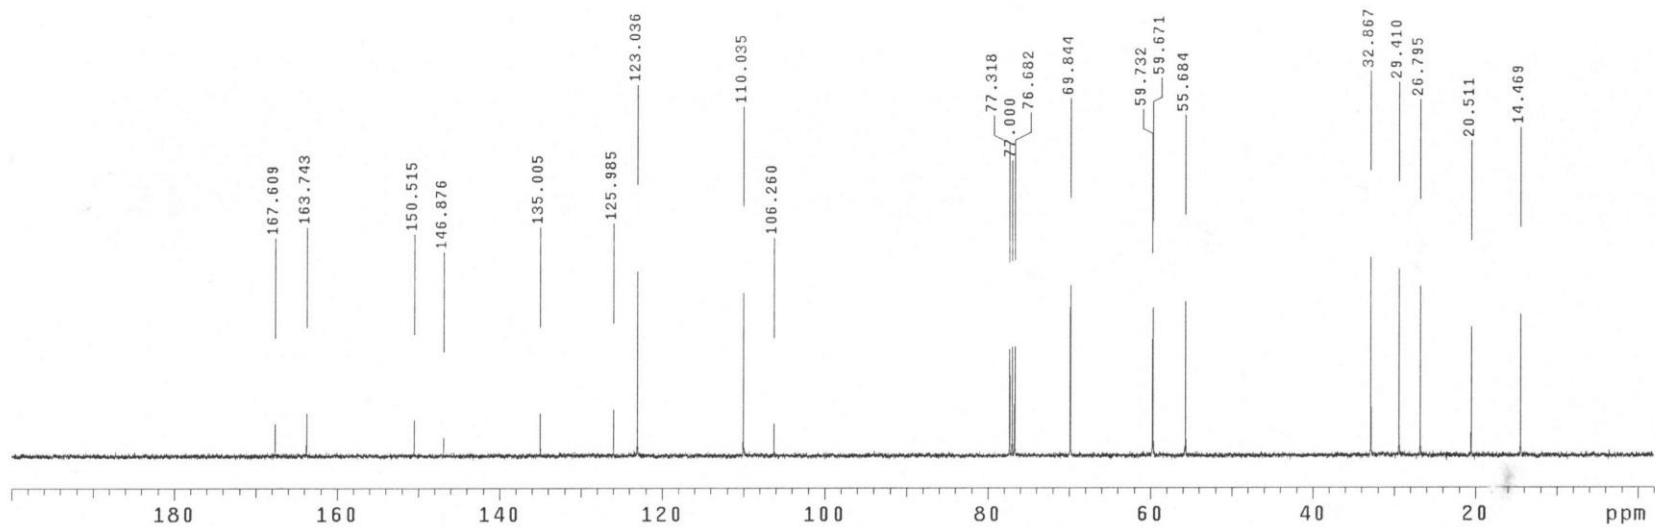

# Compound 6m (<sup>1</sup>H-NMR spectral data)

YNB2527

Pulse Sequence: s2pu1  
UNITYplus-400 "unity400"  
Date: Sep 30 2022  
Solvent: CDCl<sub>3</sub>  
Ambient temperature  
Total 32 repetitions

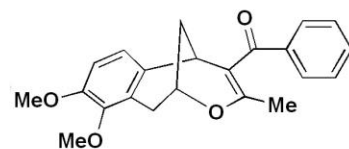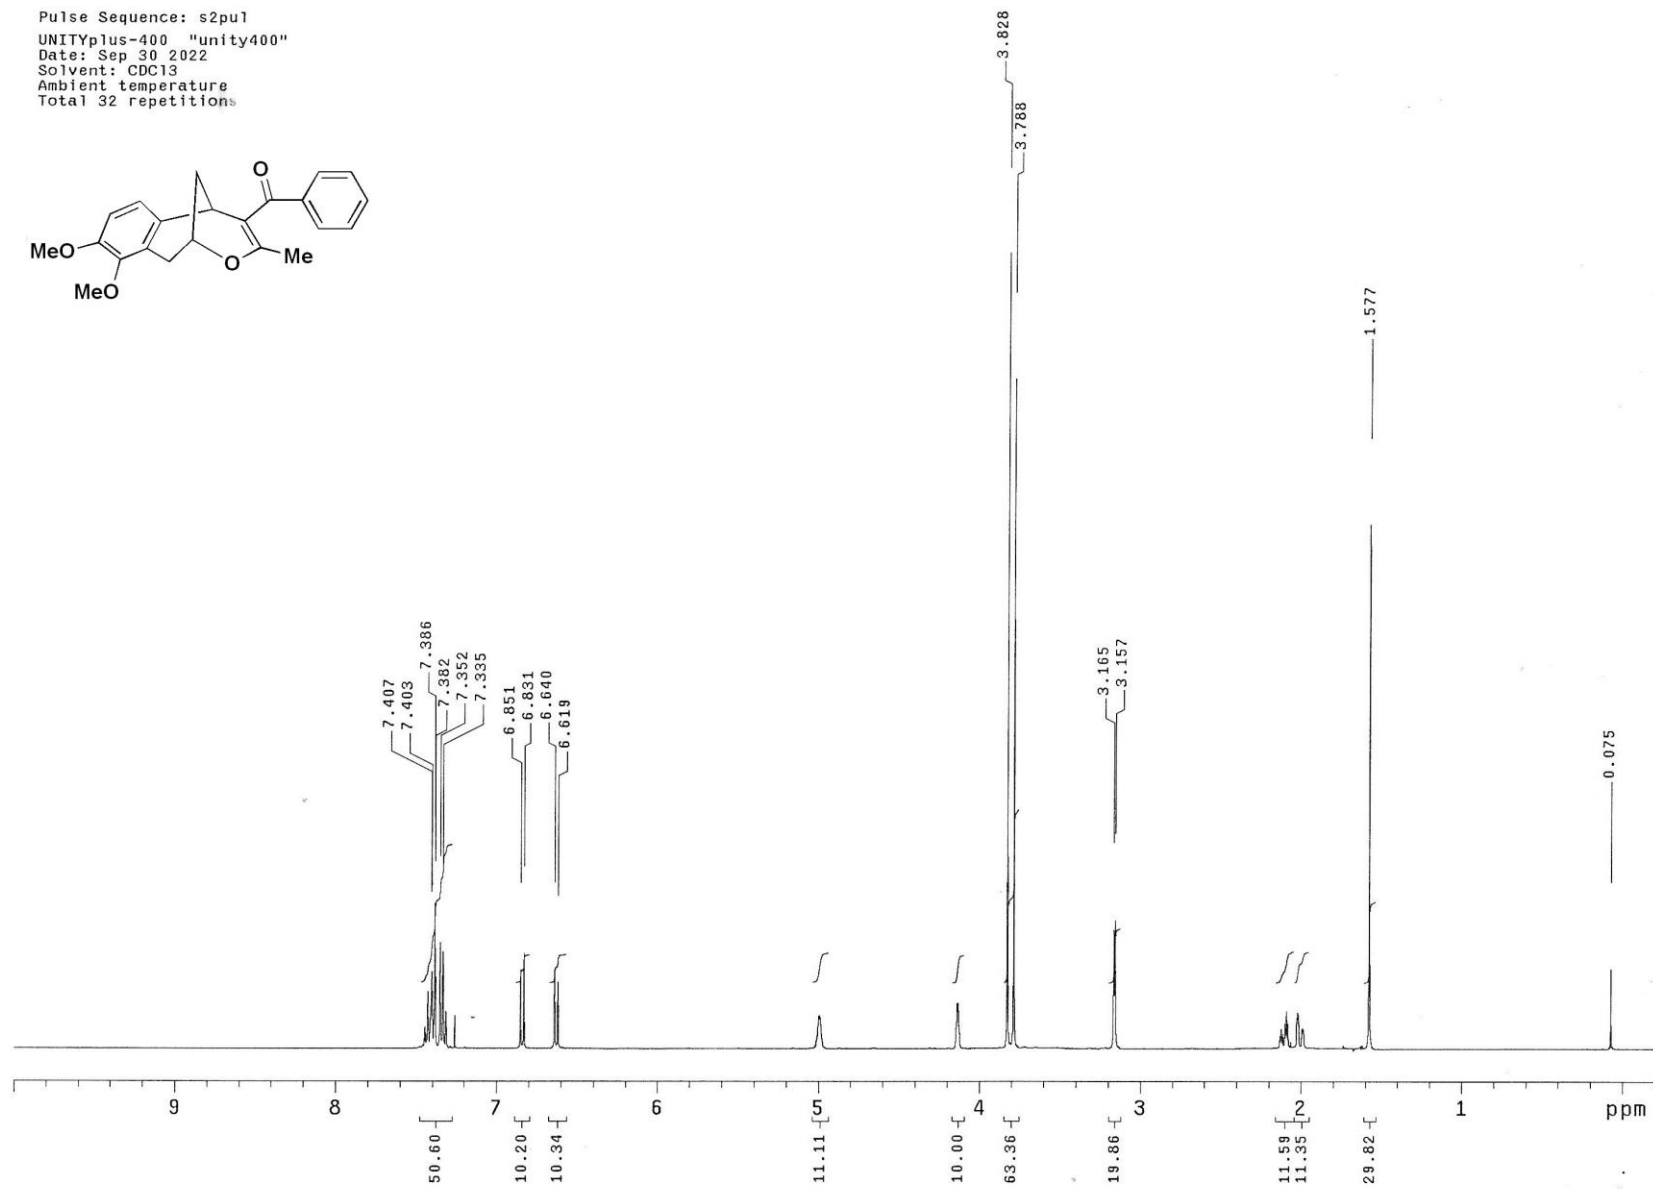

# Compound 6m (<sup>13</sup>C-NMR spectral data)

Pulse Sequence: s2pu1  
UNITYplus-400 "unity400"  
Date: Sep 30 2022  
Solvent: CDC13  
Ambient temperature  
Total 704 repetitions

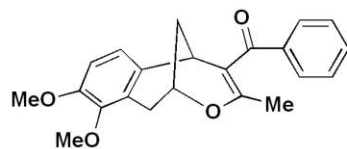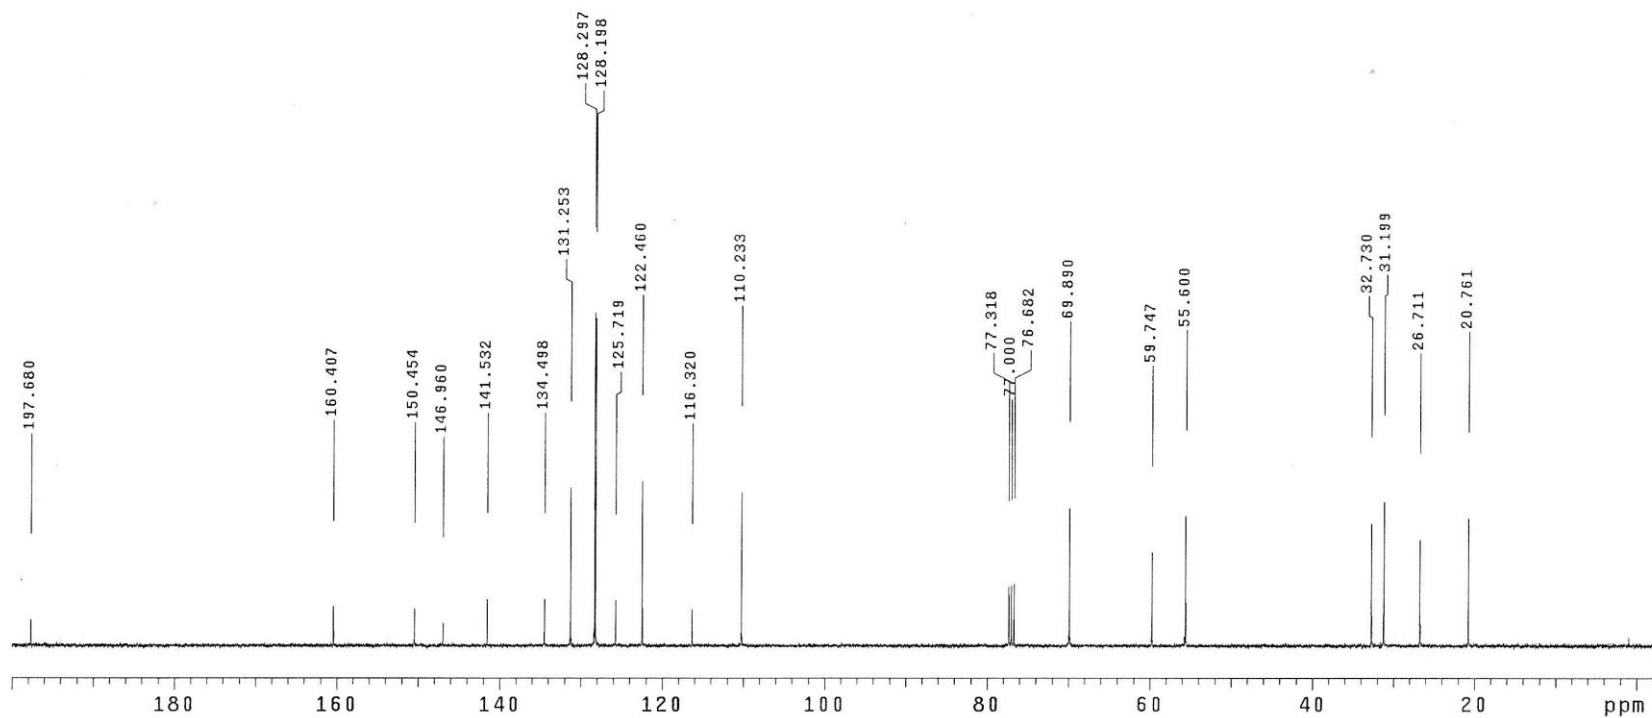

# Compound 6n (<sup>1</sup>H-NMR spectral data)

YNB1205

Pulse Sequence: s2pu1  
UNITYplus-400 "unity400"  
Date: Dec 6 2022  
Solvent: CDCl<sub>3</sub>  
Ambient temperature  
Total 32 repetitions

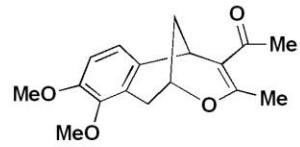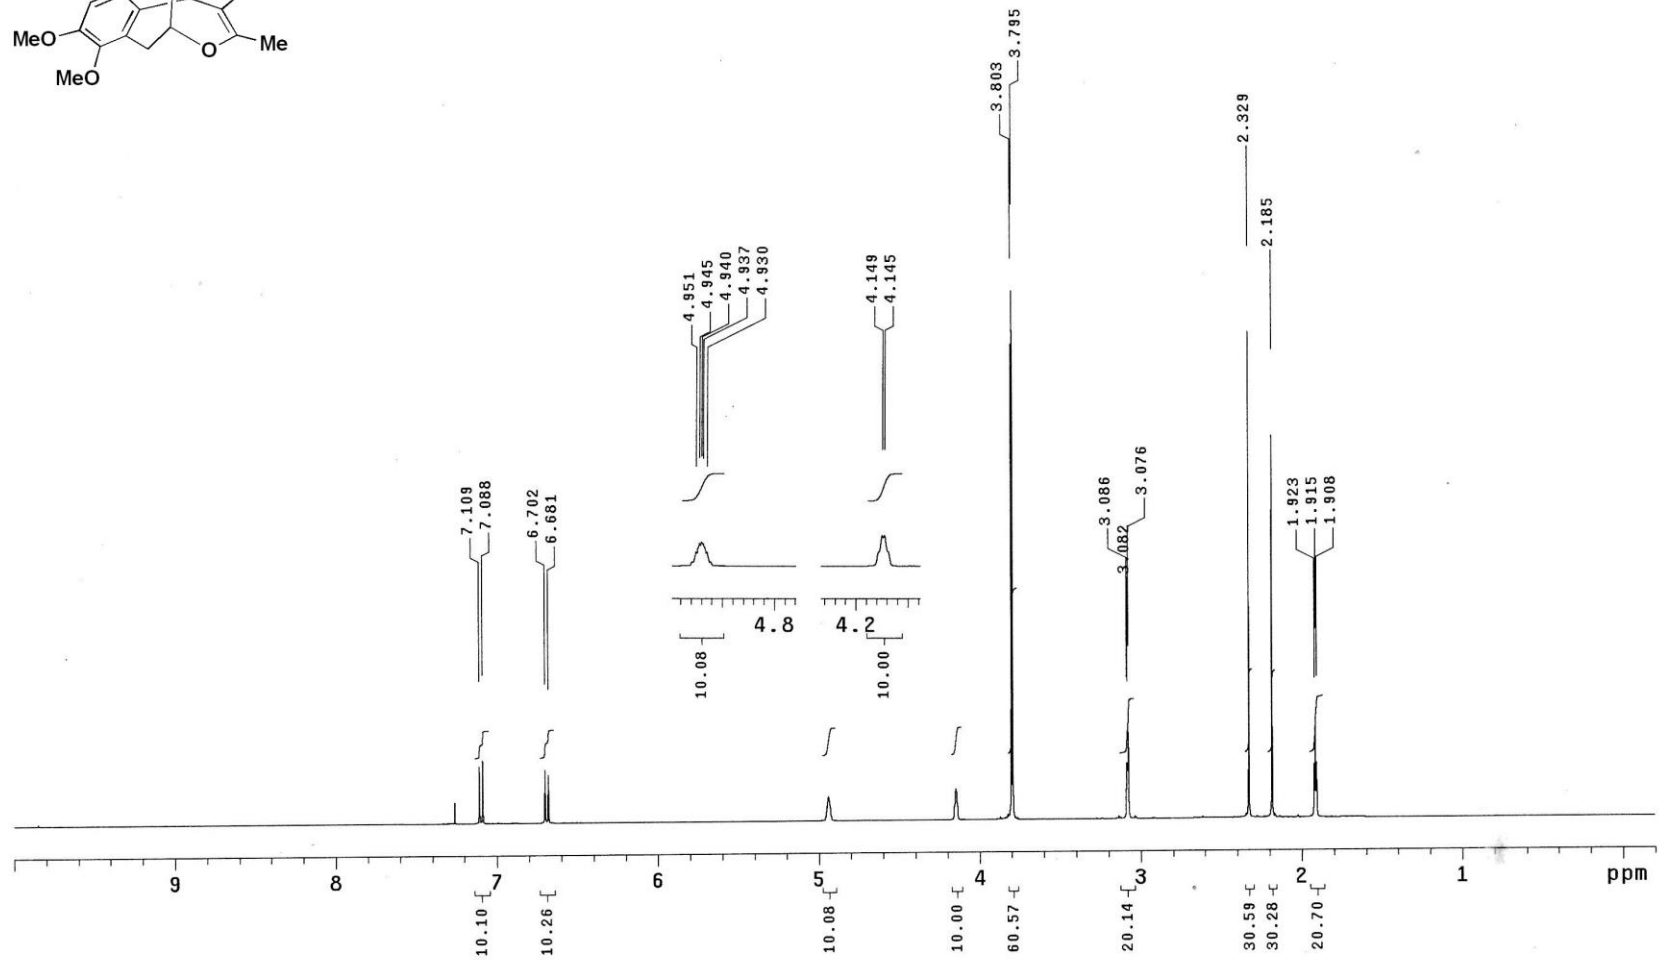

# Compound 6n (<sup>13</sup>C-NMR spectral data)

YNB1205

Pulse Sequence: s2pu1

UNITYplus-400 "unity400"

Date: Dec 6 2022

Solvent: CDCl<sub>3</sub>

Ambient temperature

Total 1040 repetitions

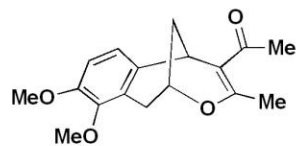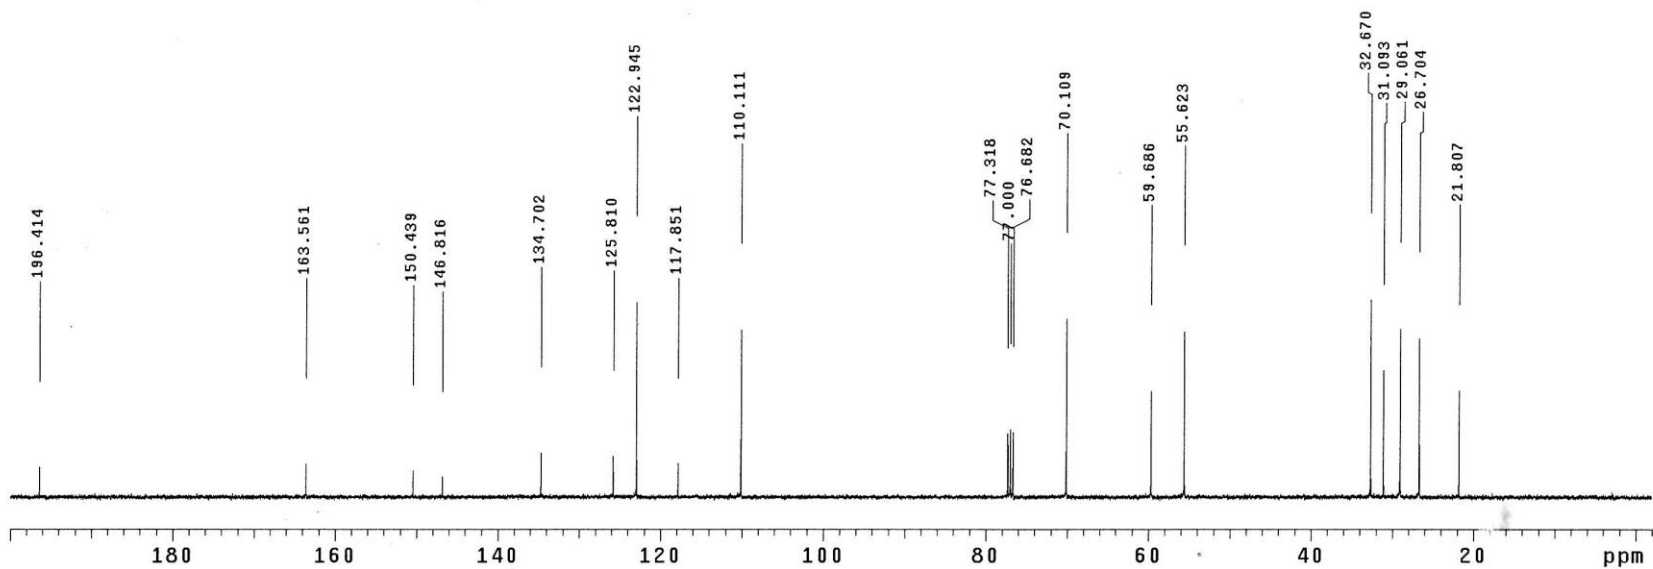

# Compound 6o (<sup>1</sup>H-NMR spectral data)

YNB1207

Pulse Sequence: s2pu1  
 UNITYplus-400 "unity400"  
 Date: Dec 8 2022  
 Solvent: CDCl<sub>3</sub>  
 Ambient temperature  
 Total 32 repetitions

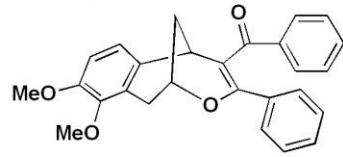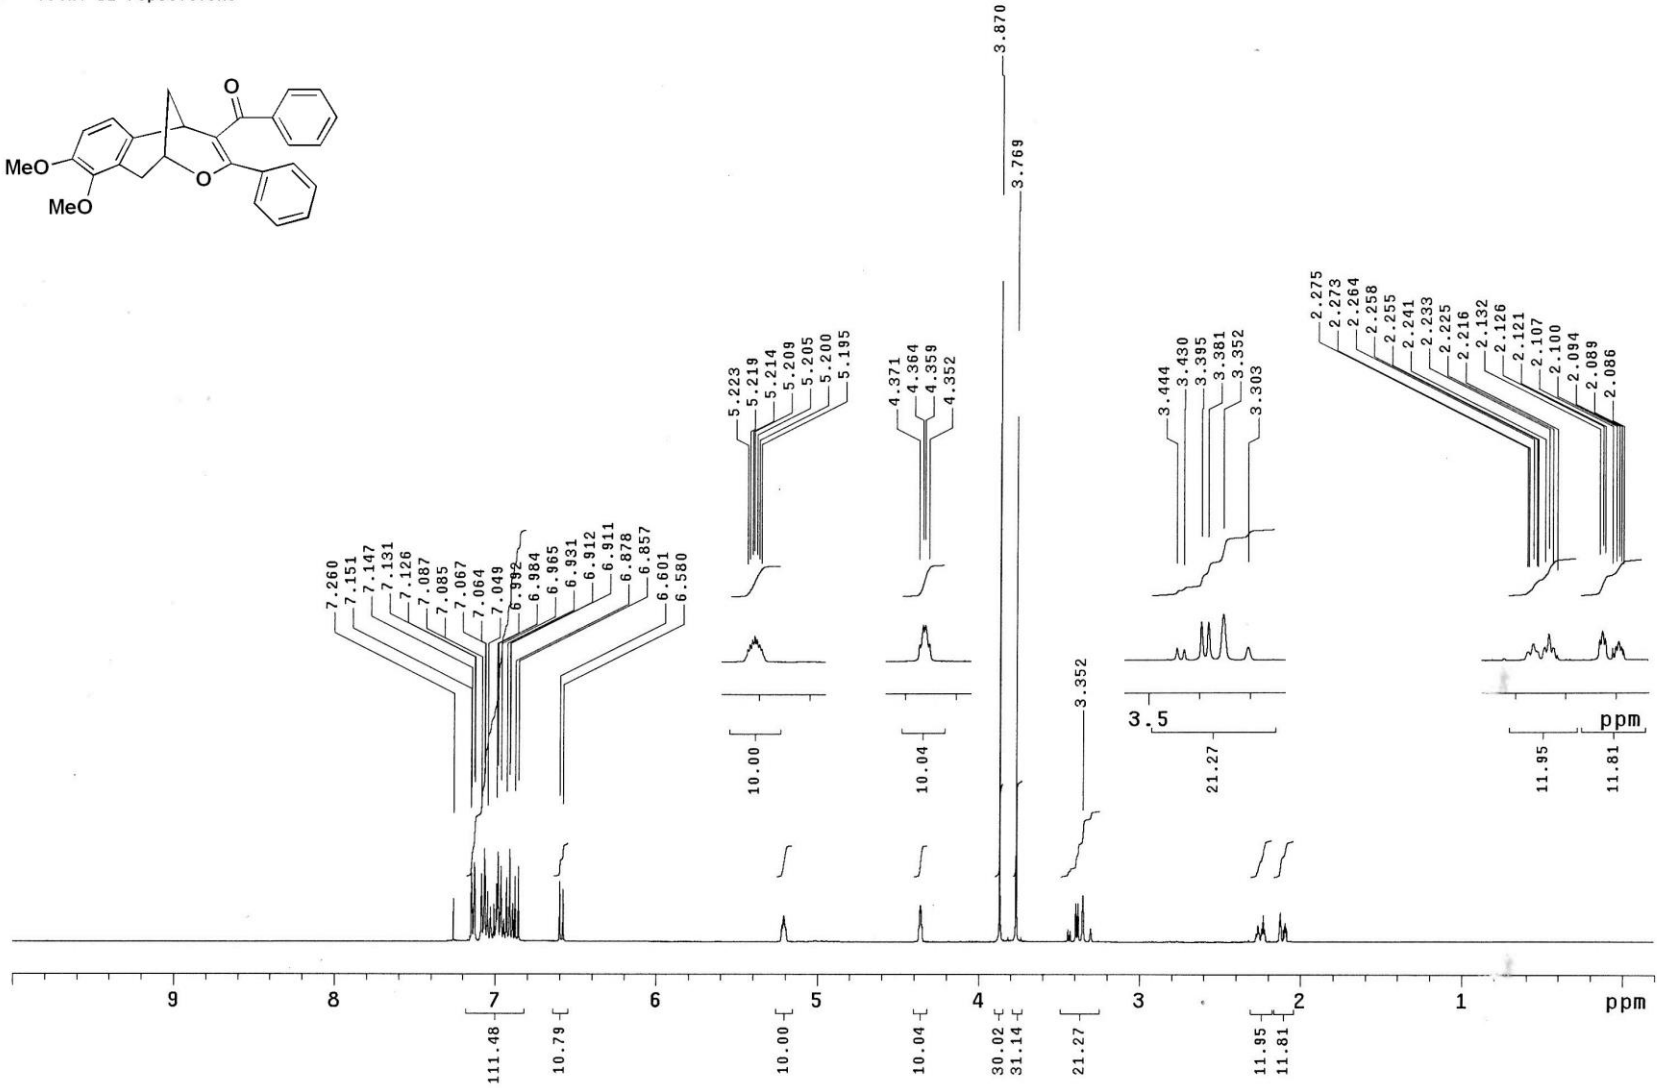

# Compound 6o (<sup>13</sup>C-NMR spectral data)

YNB1207

Pulse Sequence: s2pu1  
UNITYplus-400 "unity400"  
Date: Dec 8 2022  
Solvent: CDCl<sub>3</sub>  
Ambient temperature  
Total 1024 repetitions

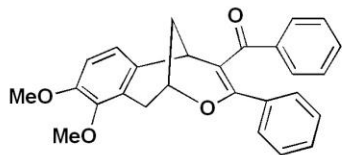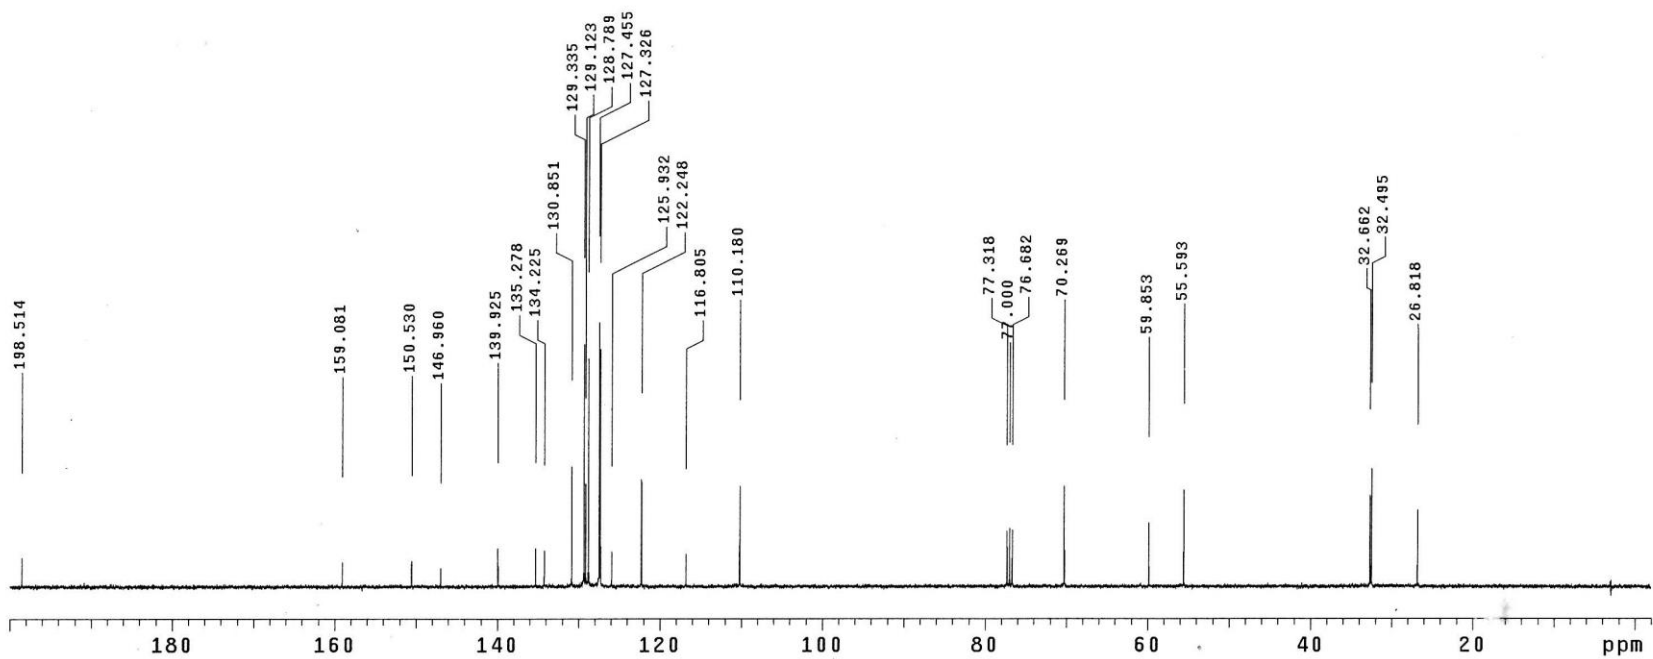

# Compound 6p (<sup>1</sup>H-NMR spectral data)

YNB926

Pulse Sequence: s2pu1  
UNITYplus-600 "KMU600.kmu.edu.tw"  
Date: Sep 27 2022  
Solvent: cdc13  
Temp. 28.0 C / 301.1 K  
Total 32 repetitions

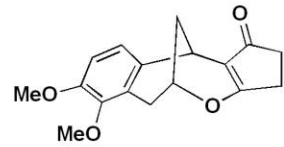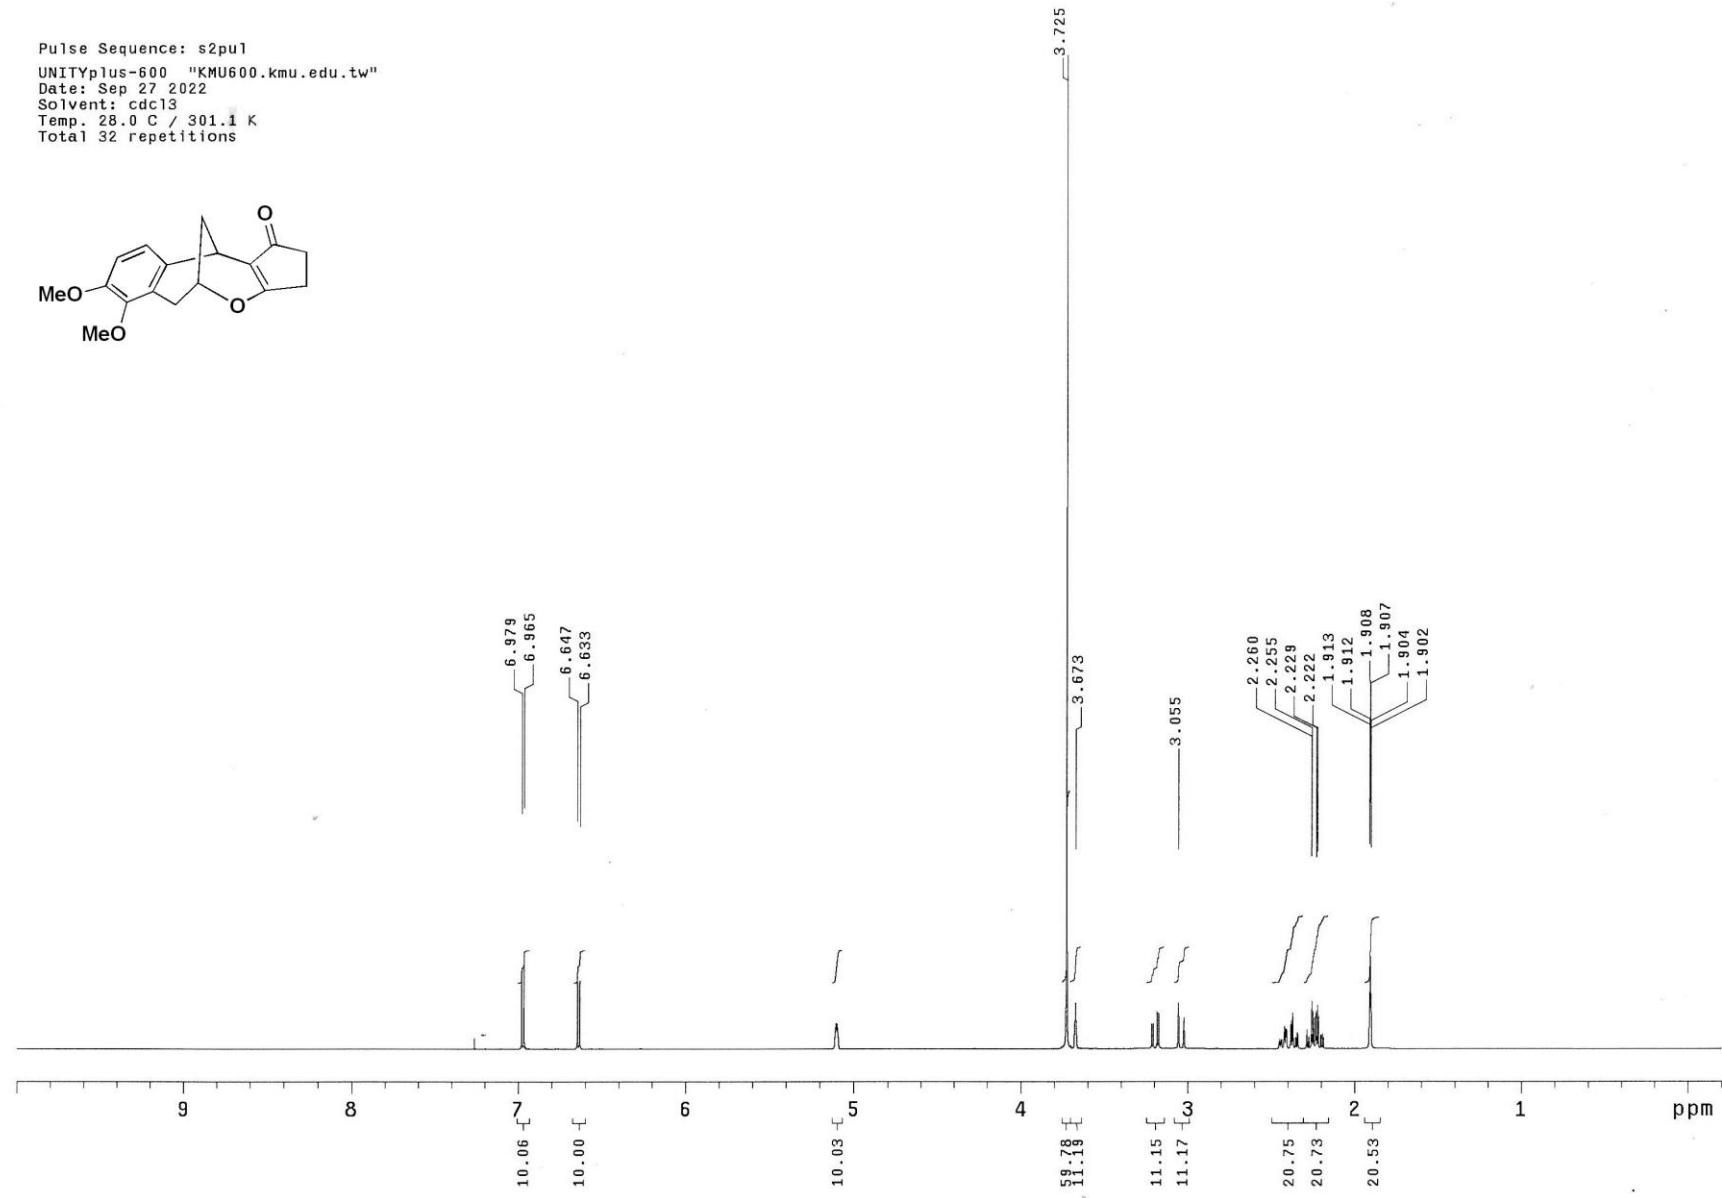



# Compound 6p (<sup>13</sup>C-NMR spectral data)

YNB926

Pulse Sequence: s2pu1  
UNITYplus-600 "KMU600.kmu.edu.tw"  
Date: Sep 27 2022  
Solvent: cdc13  
Temp: 28.0 C / 301.1 K  
Total 936 repetitions

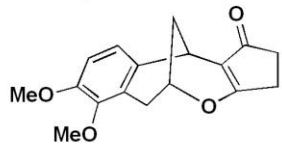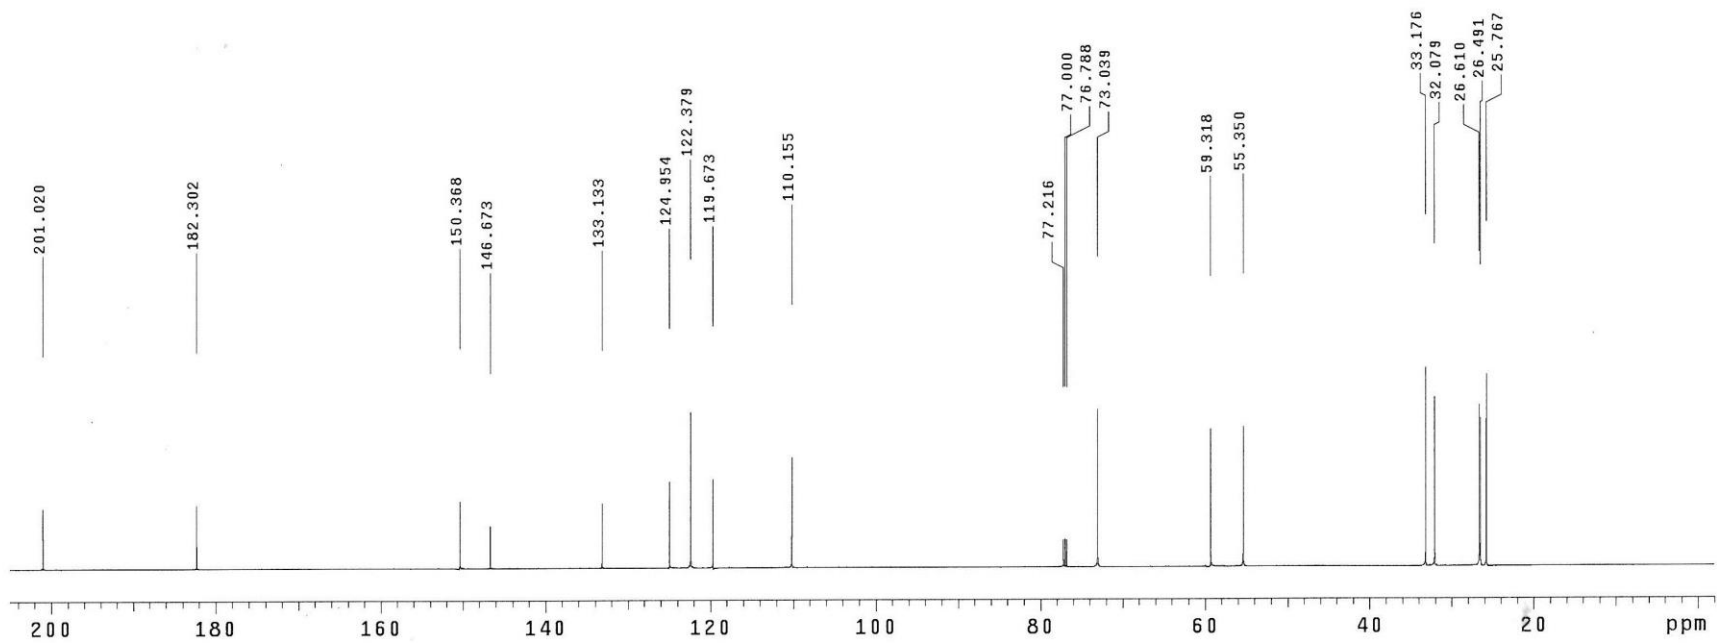

# Compound 6q (<sup>1</sup>H-NMR spectral data)

YNB928

Pulse Sequence: s2pu1  
UNITYplus-400 "unity400"  
Date: Sep 29 2022  
Solvent: CDCl<sub>3</sub>  
Ambient temperature  
Total 32 repetitions

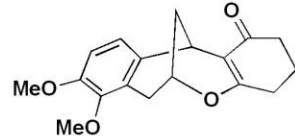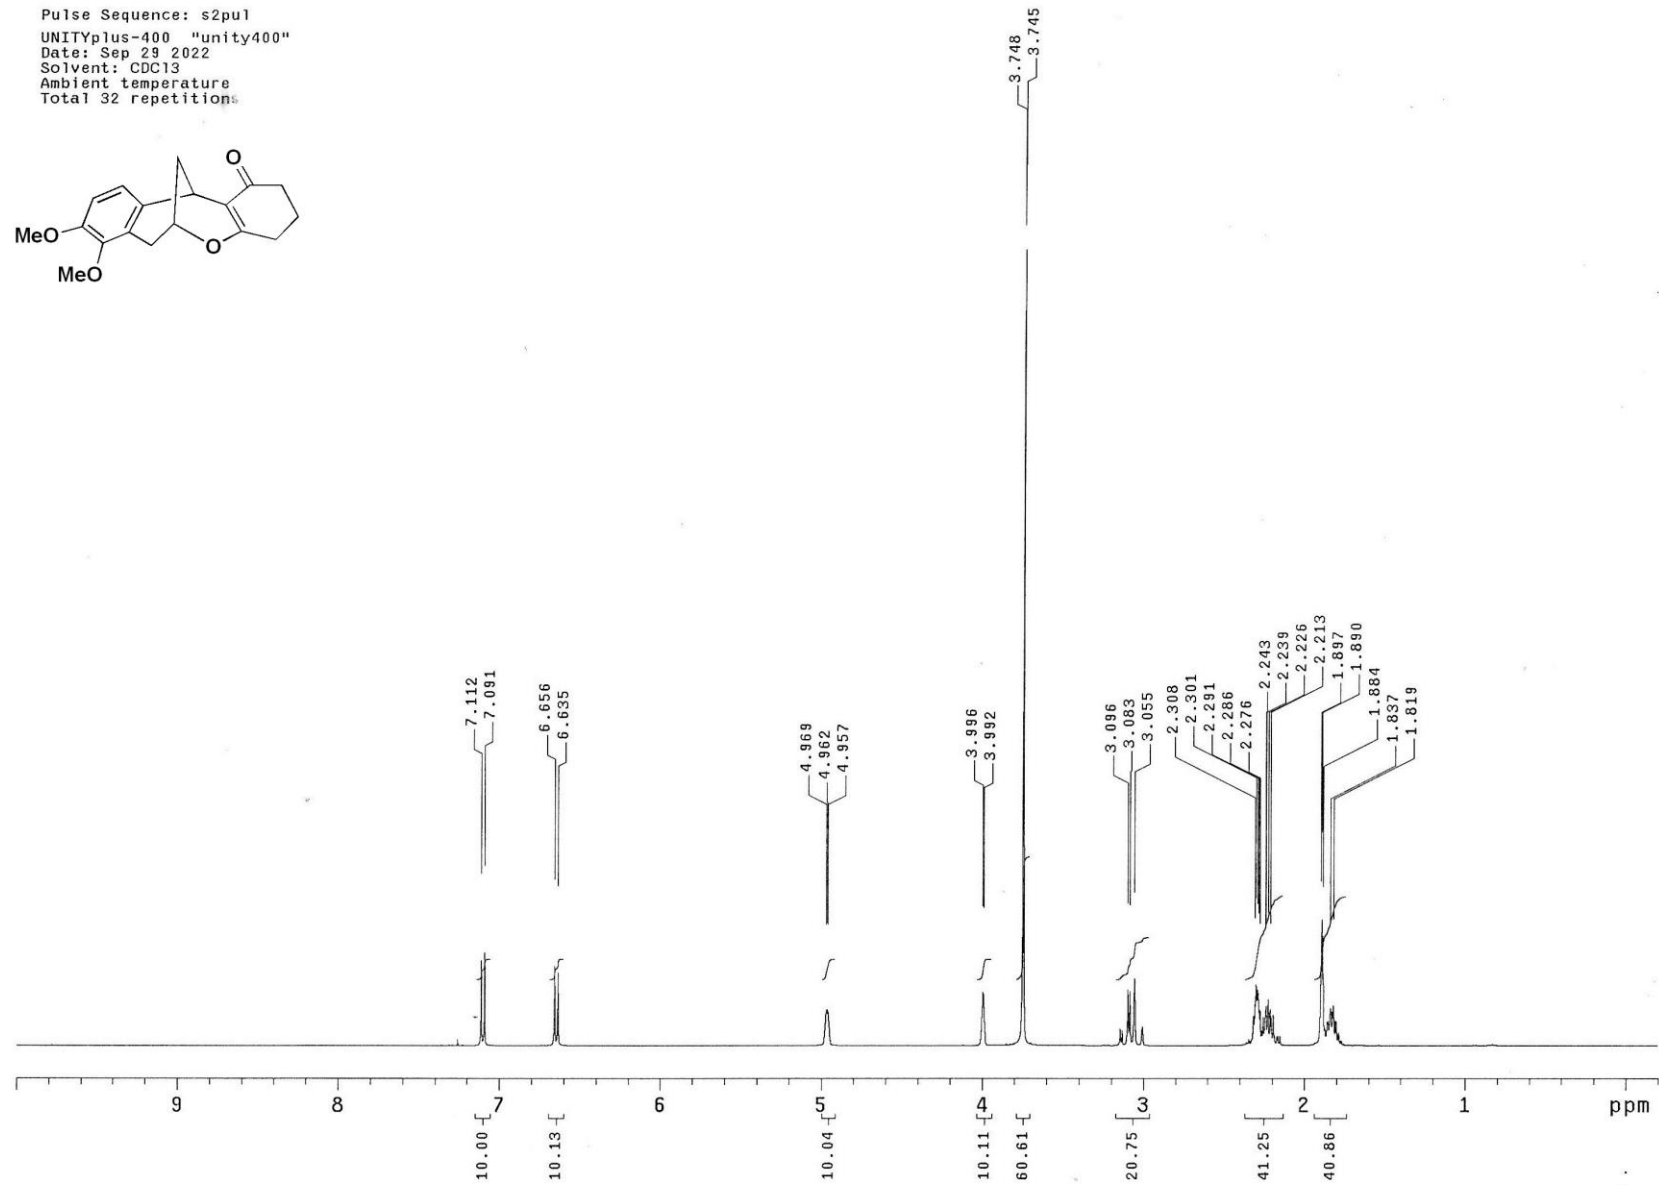

# Compound 6q (<sup>13</sup>C-NMR spectral data)

YNB928

Pulse Sequence: s2pu1  
UNITYplus-400 "unity400"  
Date: Sep 29 2022  
Solvent: CDCl<sub>3</sub>  
Ambient temperature  
Total 1056 repetitions

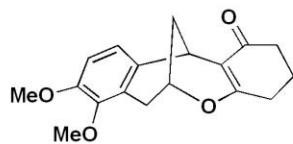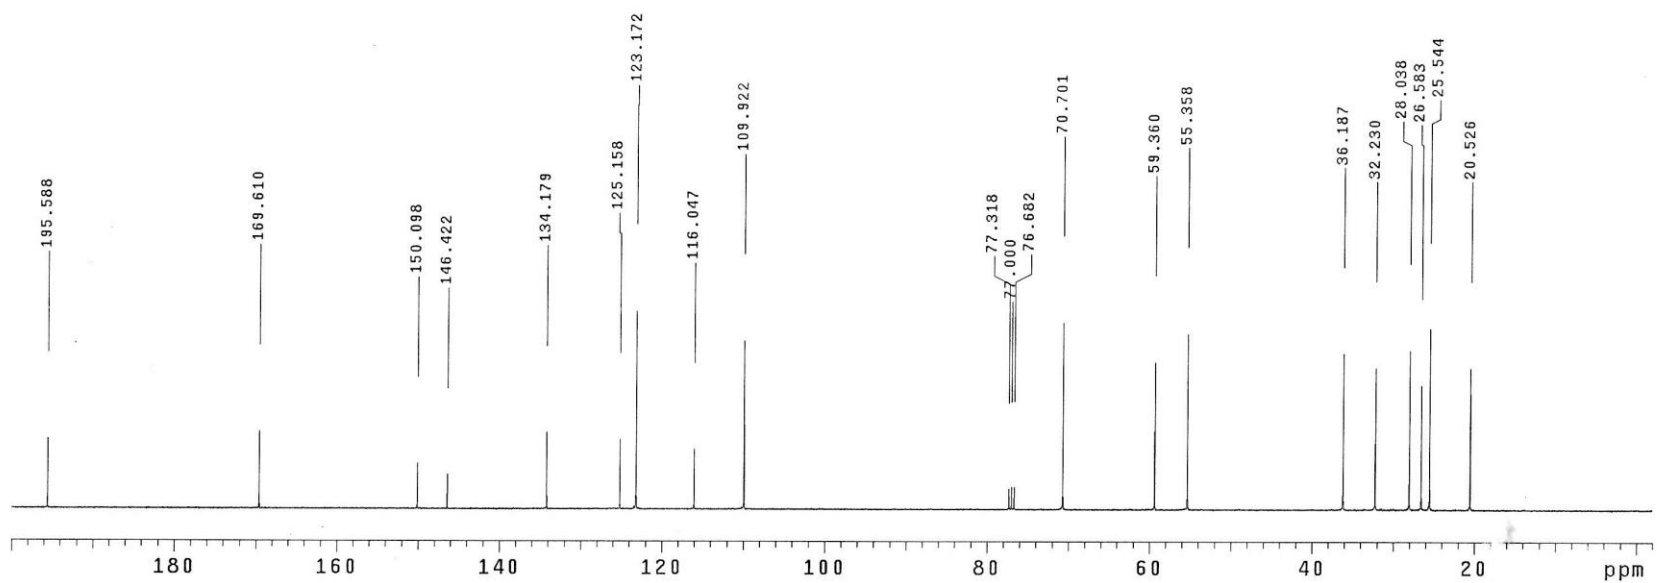

# Compound 6r (<sup>1</sup>H-NMR spectral data)

YNB908

Pulse Sequence: s2pu1  
UNITYplus-400 "unity400"  
Date: Sep 12 2022  
Solvent: CDC13  
Ambient temperature  
Total 32 repetitions

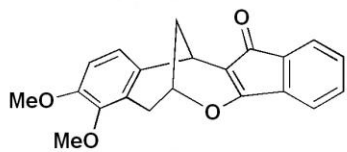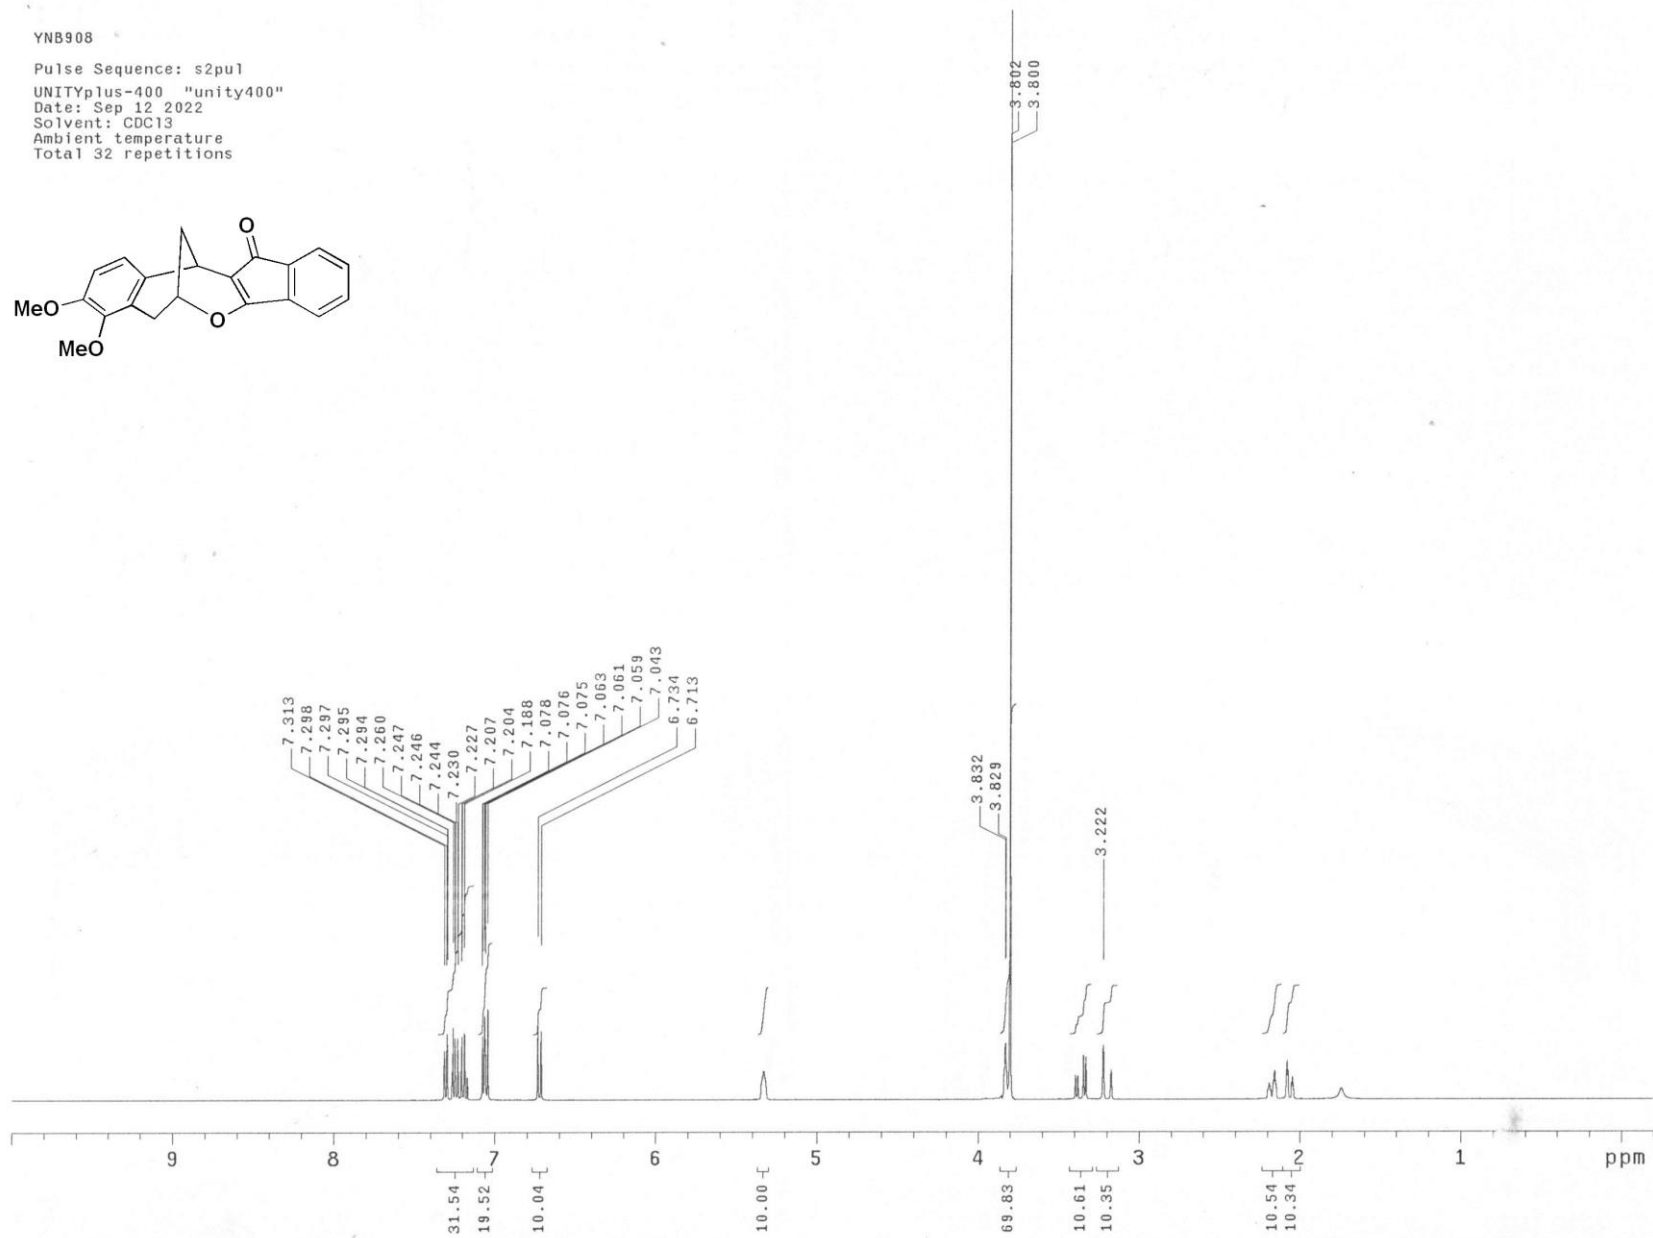

# Compound 6r (<sup>13</sup>C-NMR spectral data)

YNB908

Pulse Sequence: s2pu1  
UNITYplus-400 "unity400"  
Date: Sep 12 2022  
Solvent: CDCl<sub>3</sub>  
Ambient temperature  
Total 3216 repetitions

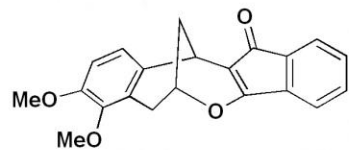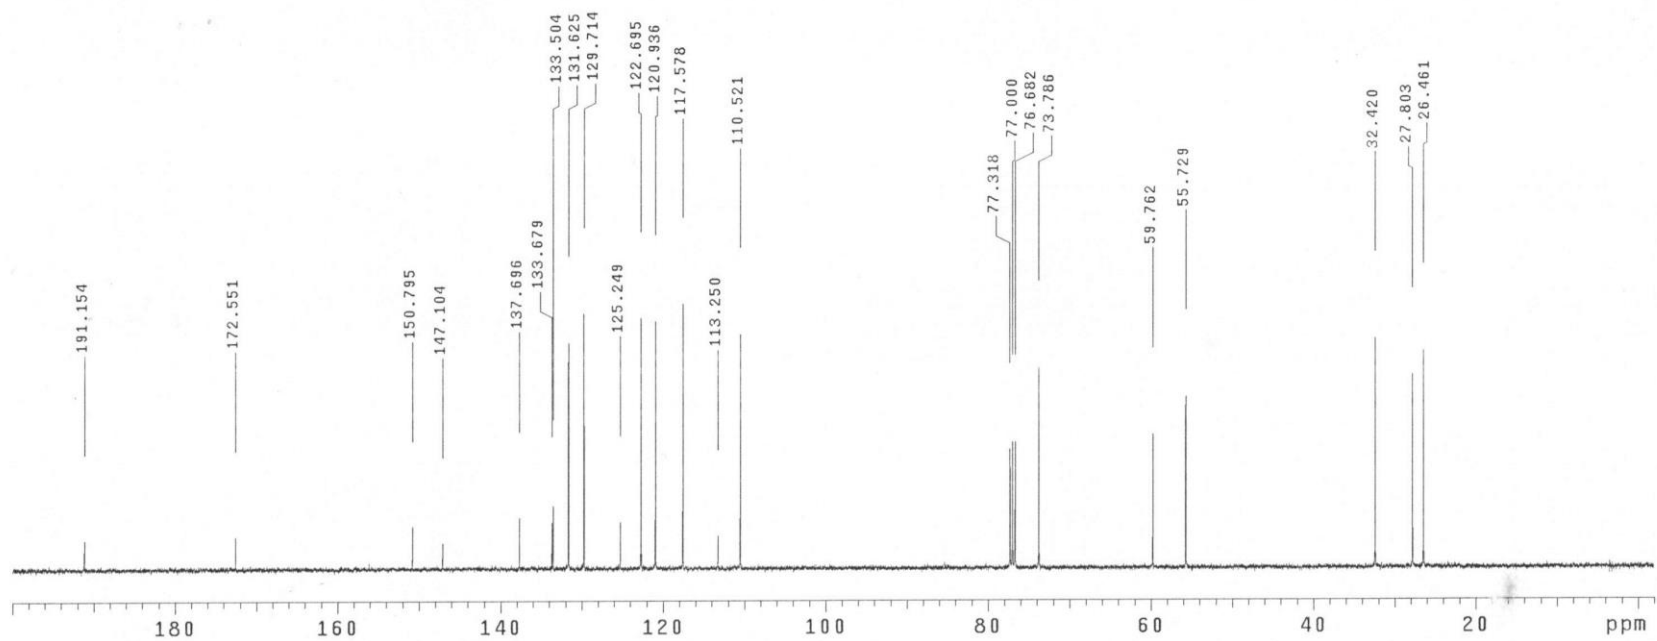

# Compound 6s (<sup>1</sup>H-NMR spectral data)

YNB1013

Pulse Sequence: s2pu1  
 Mercury-400BB "MerPlus400"  
 Date: Oct 14 2022  
 Solvent: cdc13  
 Ambient temperature  
 Total 32 repetitions

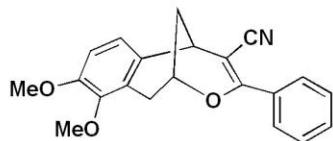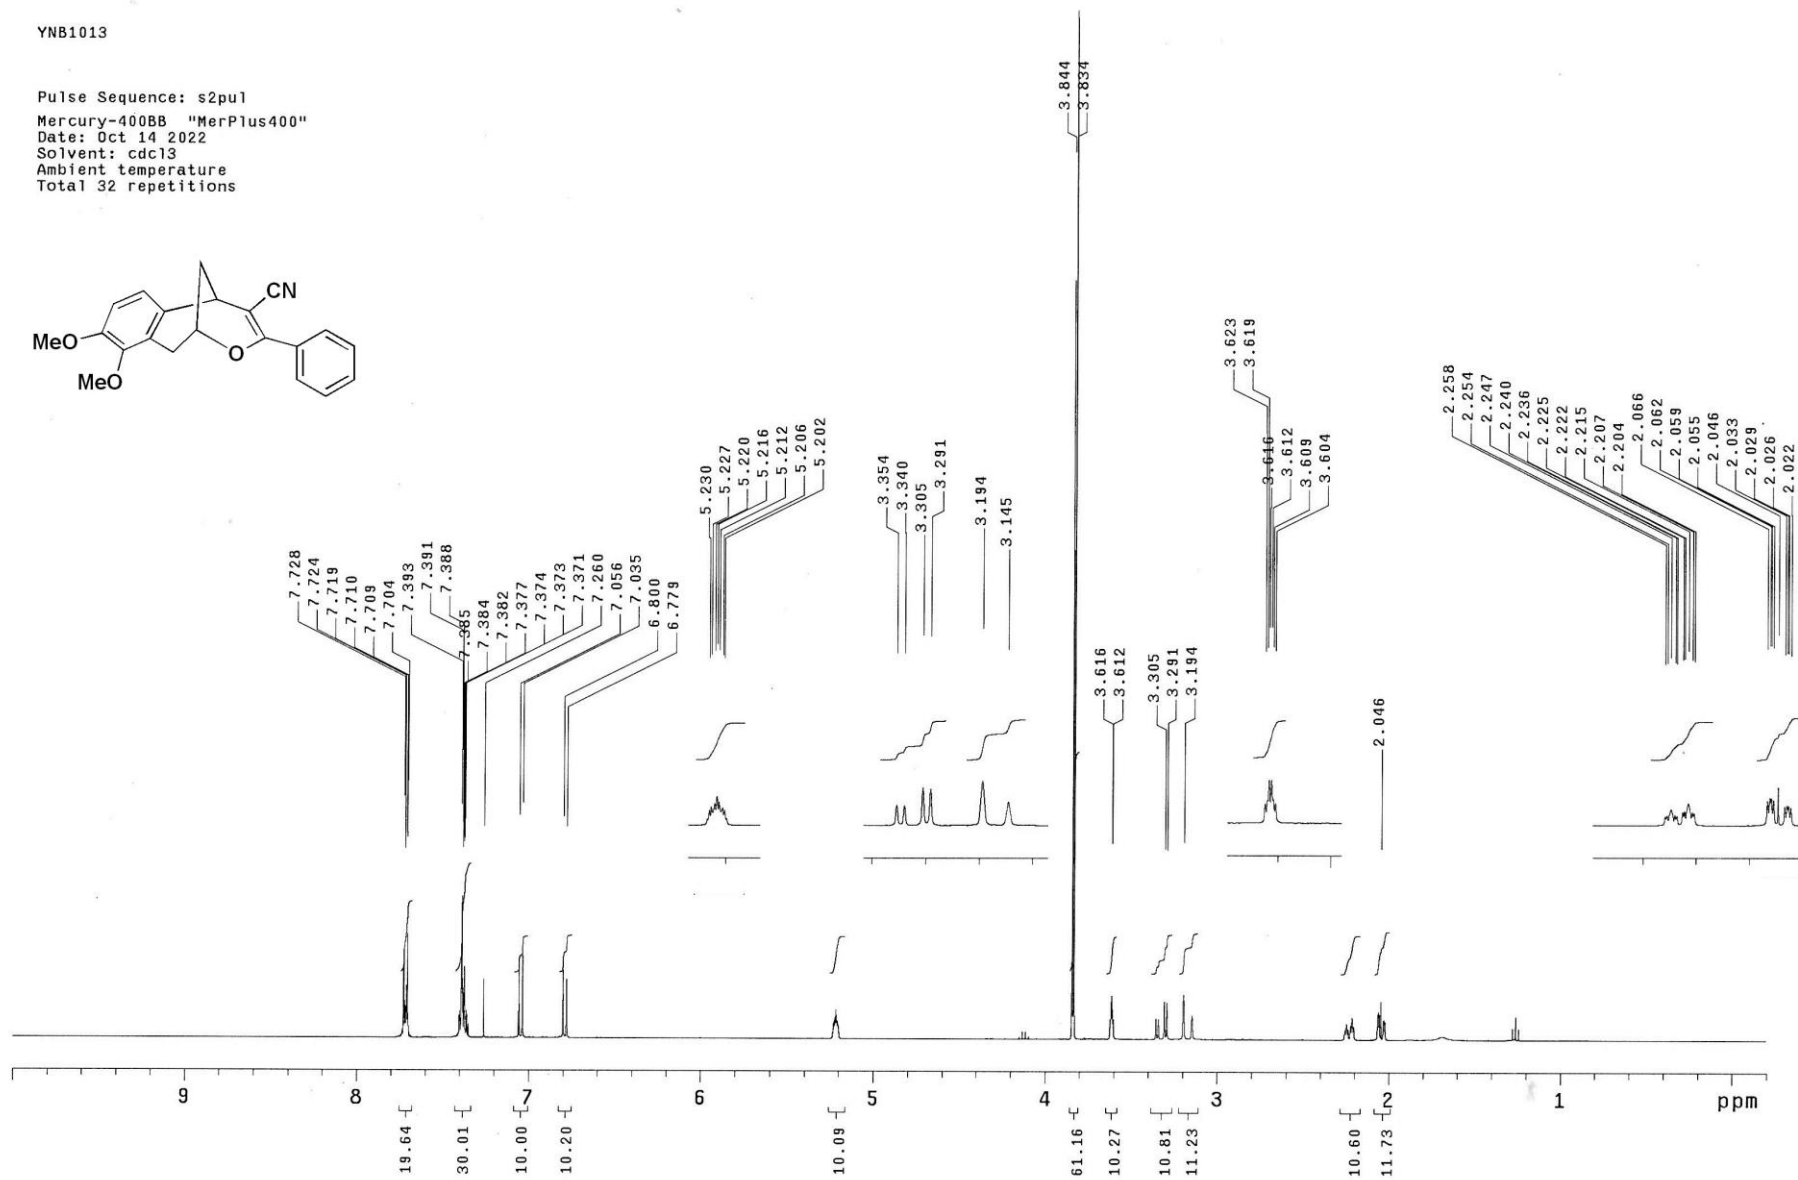

# Compound 6s (<sup>13</sup>C-NMR spectral data)

YNB1013

Pulse Sequence: s2pu1  
Mercury-400BB "MerPlus400"  
Date: Oct 14 2022  
Solvent: cdc13  
Ambient temperature  
Total 400 repetitions

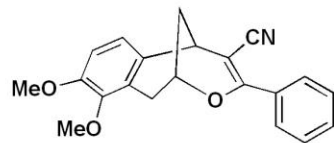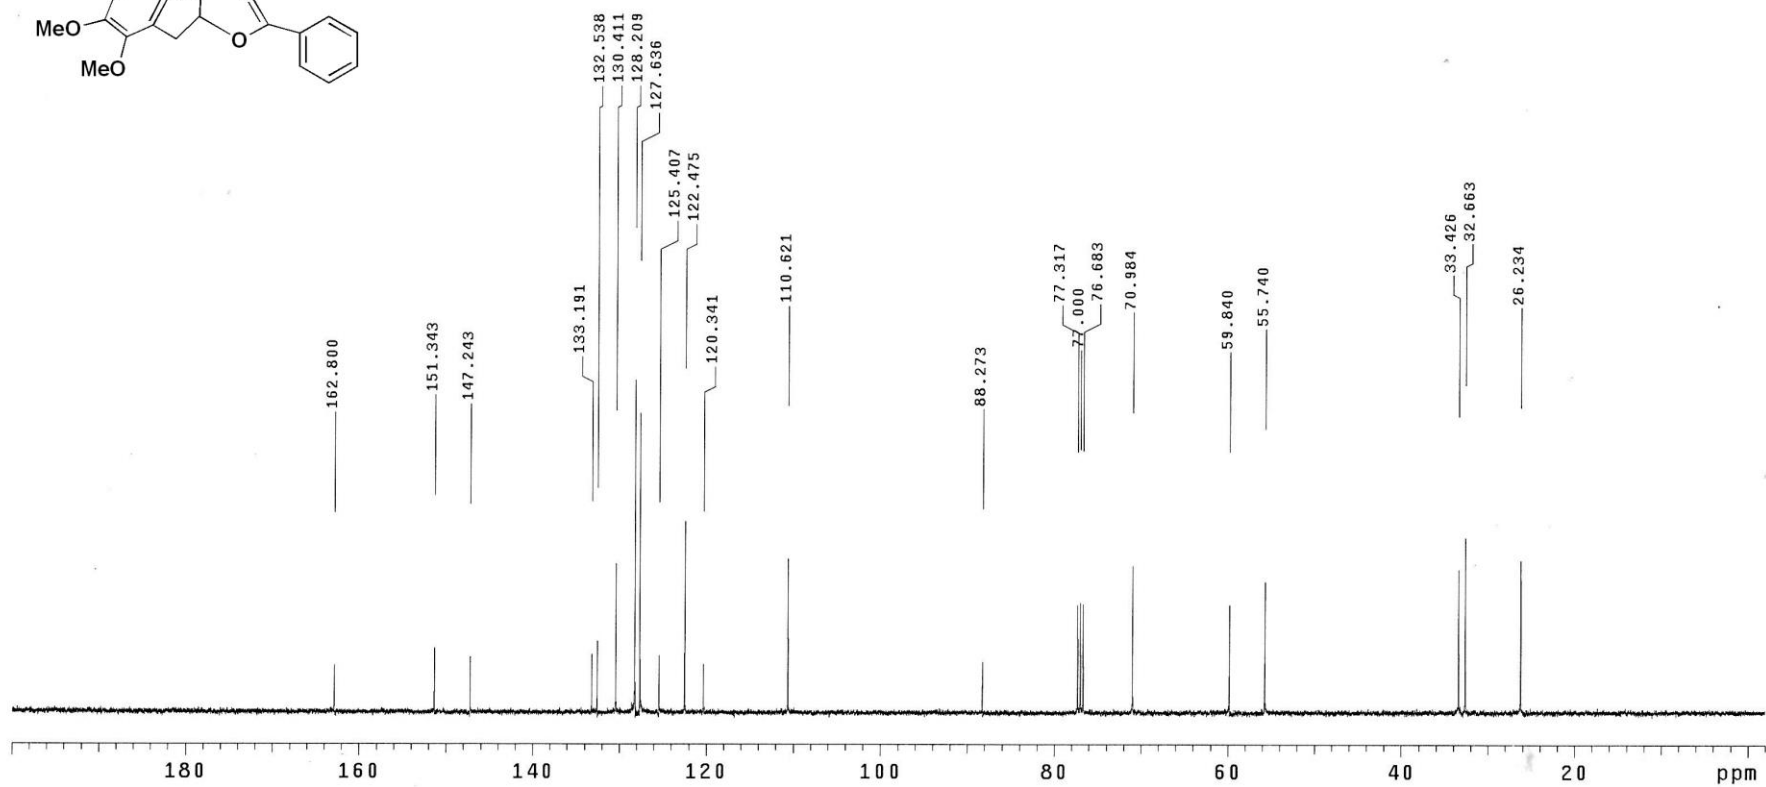

# Compound 6t (<sup>1</sup>H-NMR spectral data-1)

YNB33-38

Pulse Sequence: s2pu1

UNITYplus-400 "unity400"

Date: Feb 8 2023

Solvent: CDC13

Ambient temperature

Total 32 repetitions

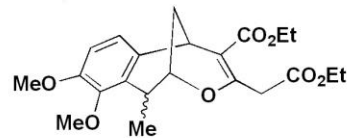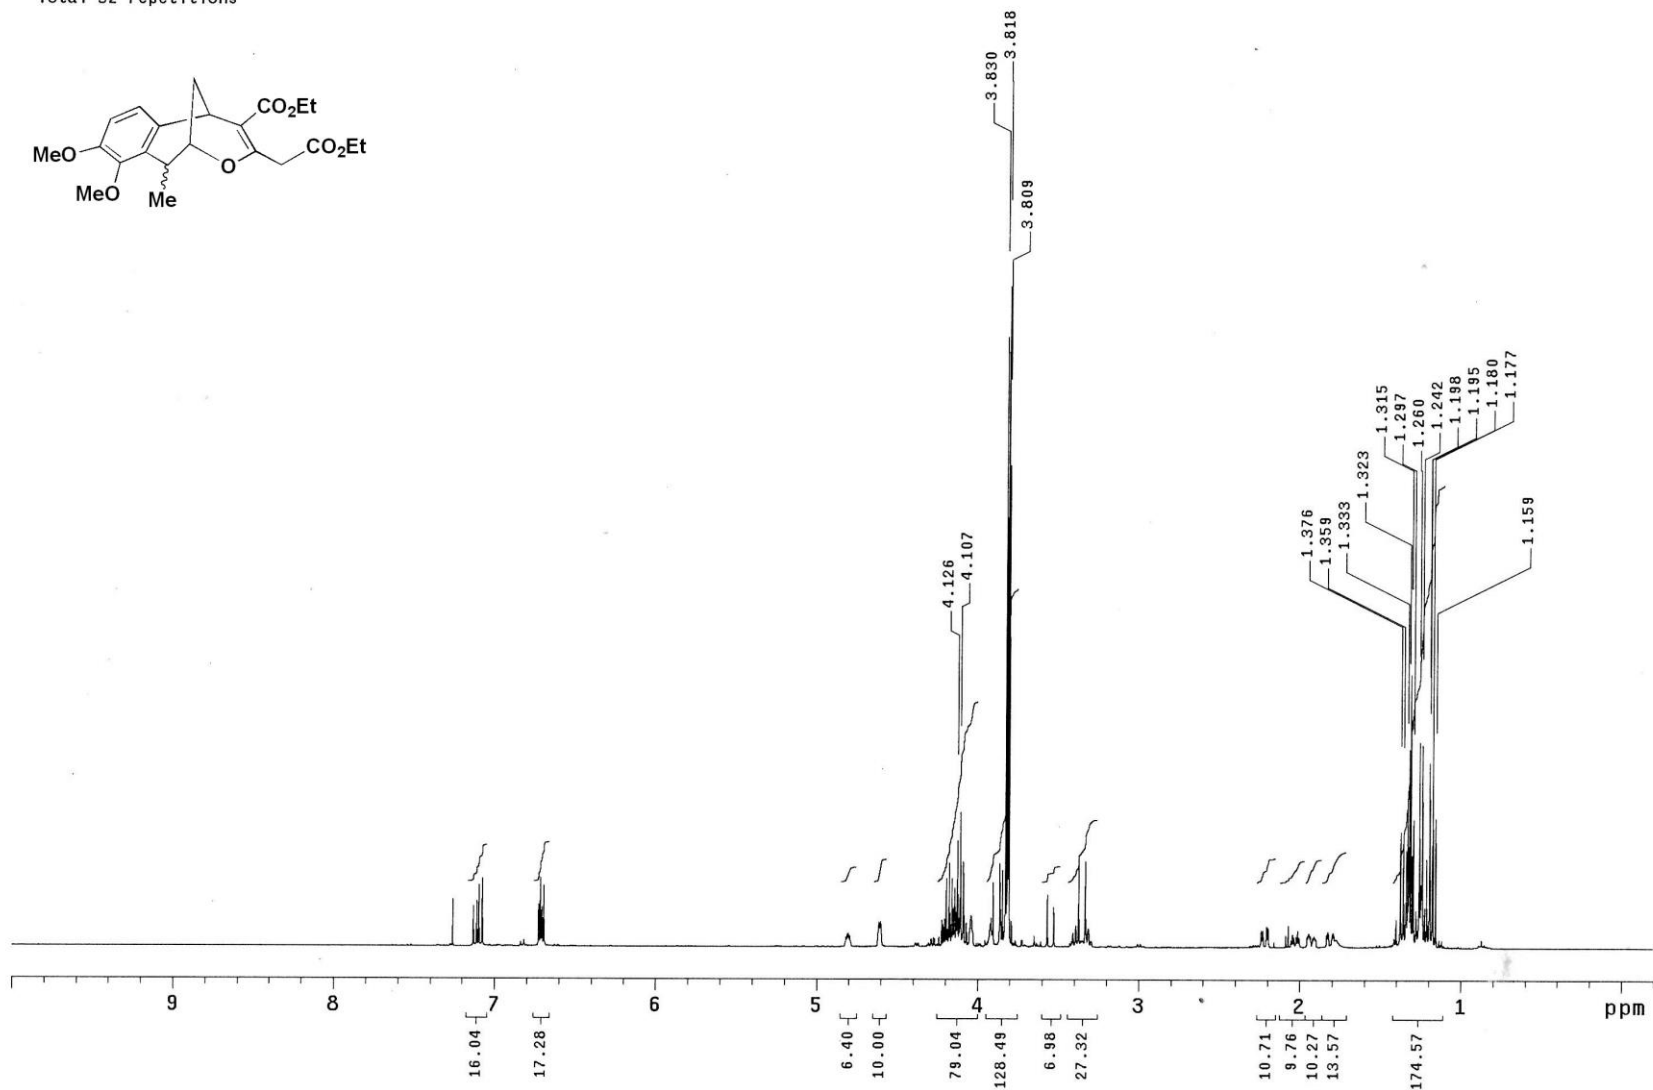



# Compound 6t (<sup>1</sup>H-NMR spectral data-2)

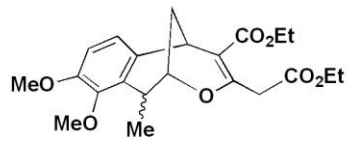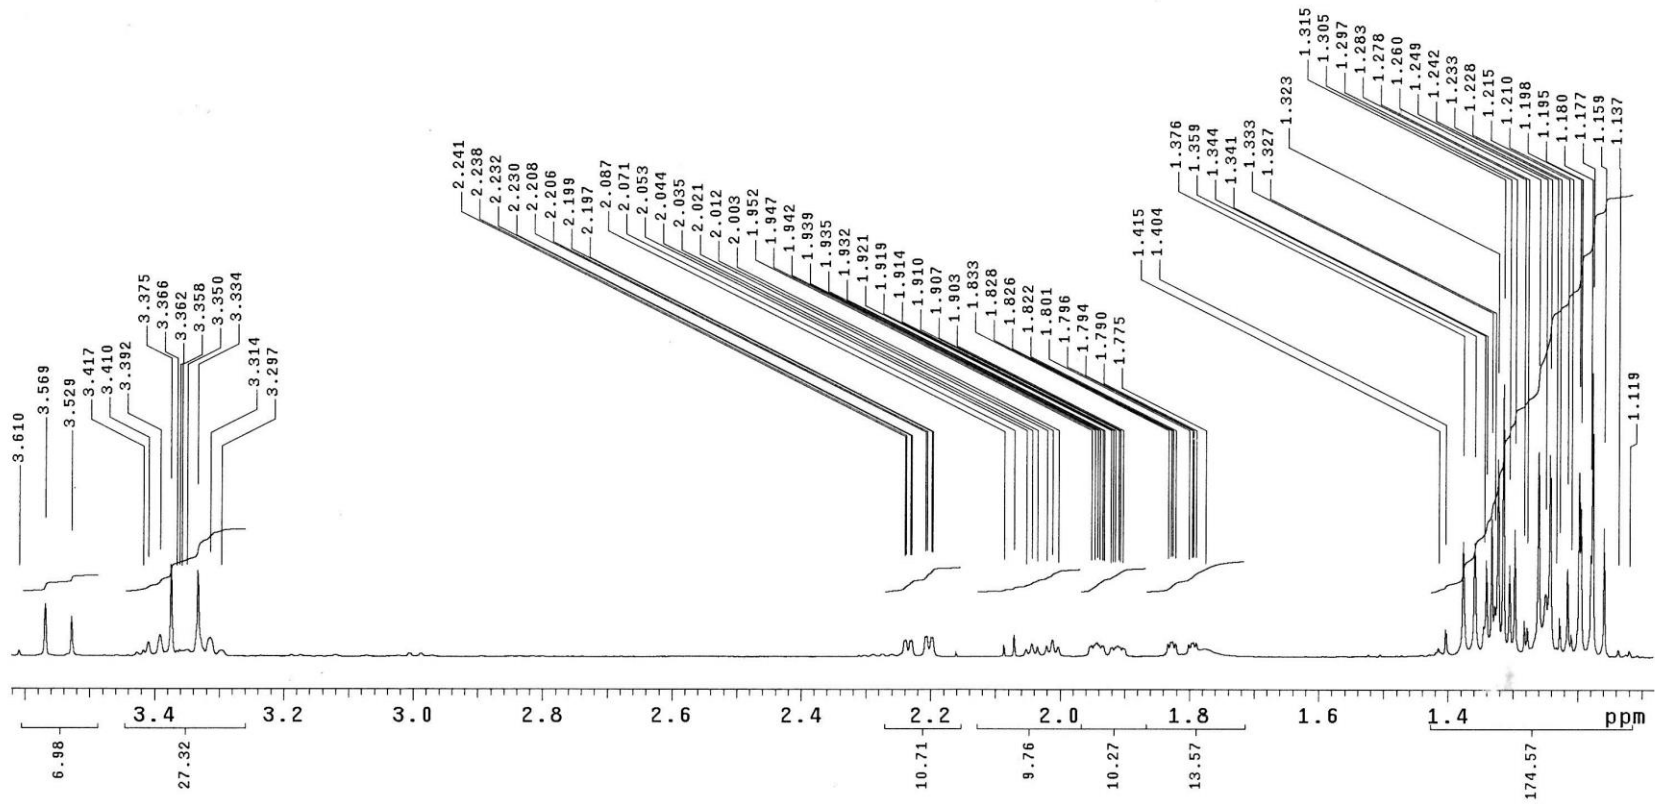

# Compound 6t (<sup>1</sup>H-NMR spectral data-3)

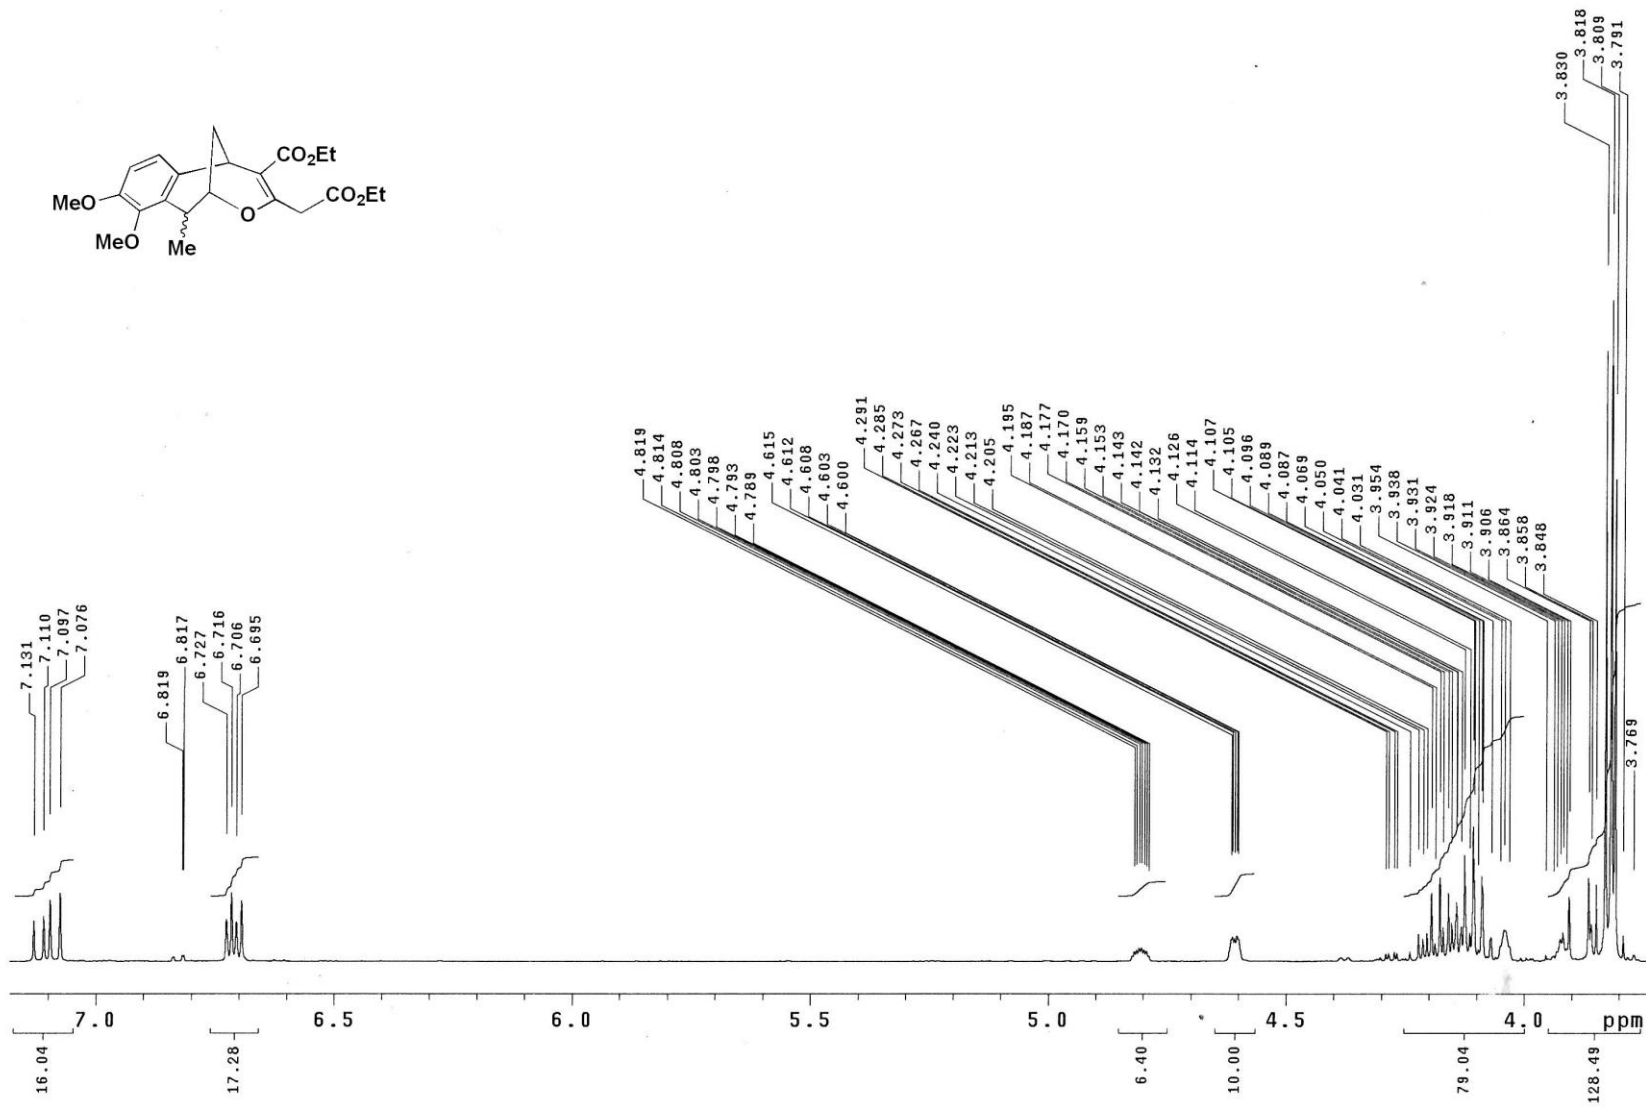

# Compound 6t (<sup>13</sup>C-NMR spectral data)

YNB33-38

Pulse Sequence: s2pu1  
UNITYplus-400 "unity400"  
Date: Feb 8 2023  
Solvent: CDCl<sub>3</sub>  
Ambient temperature  
Total 2512 repetitions

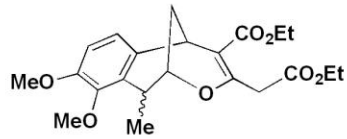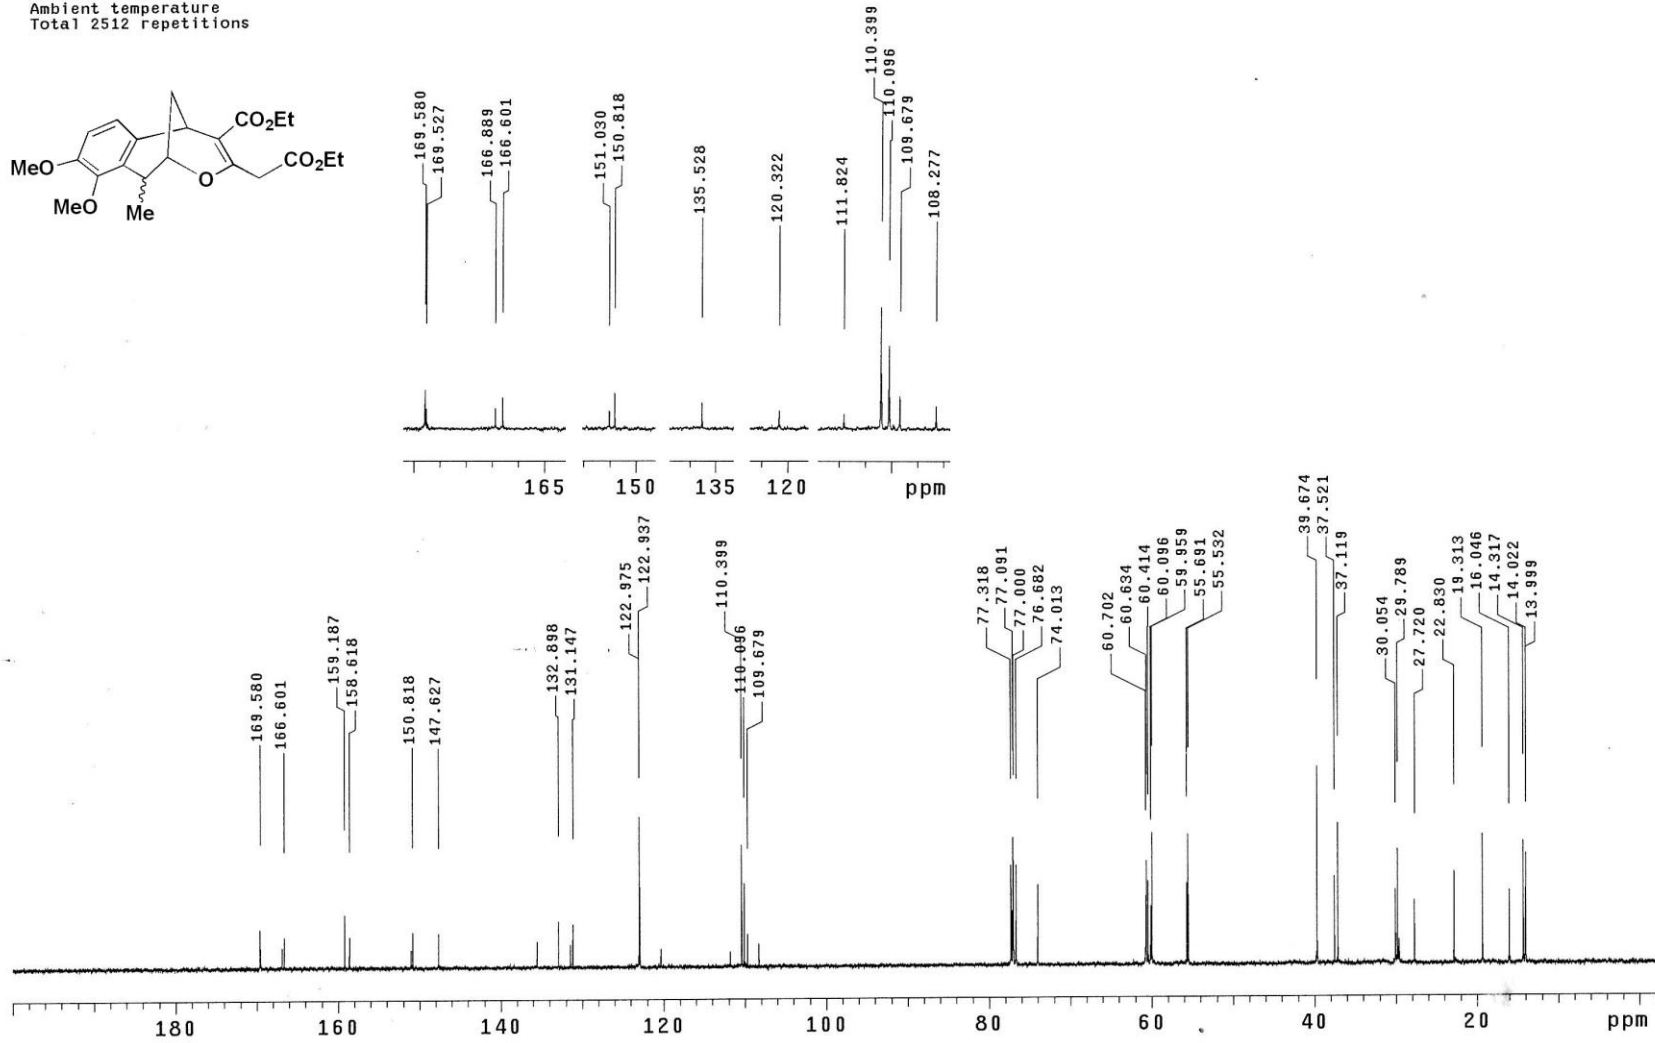

# Compound 6u (<sup>1</sup>H-NMR spectral data)

YNB0206

Pulse Sequence: s2pu1  
 UNITYplus-400 "unity400"  
 Date: Feb 7 2023  
 Solvent: CDCl<sub>3</sub>  
 Ambient temperature  
 Total 64 repetitions

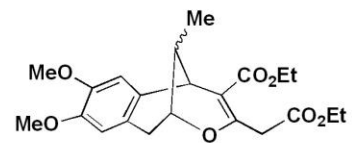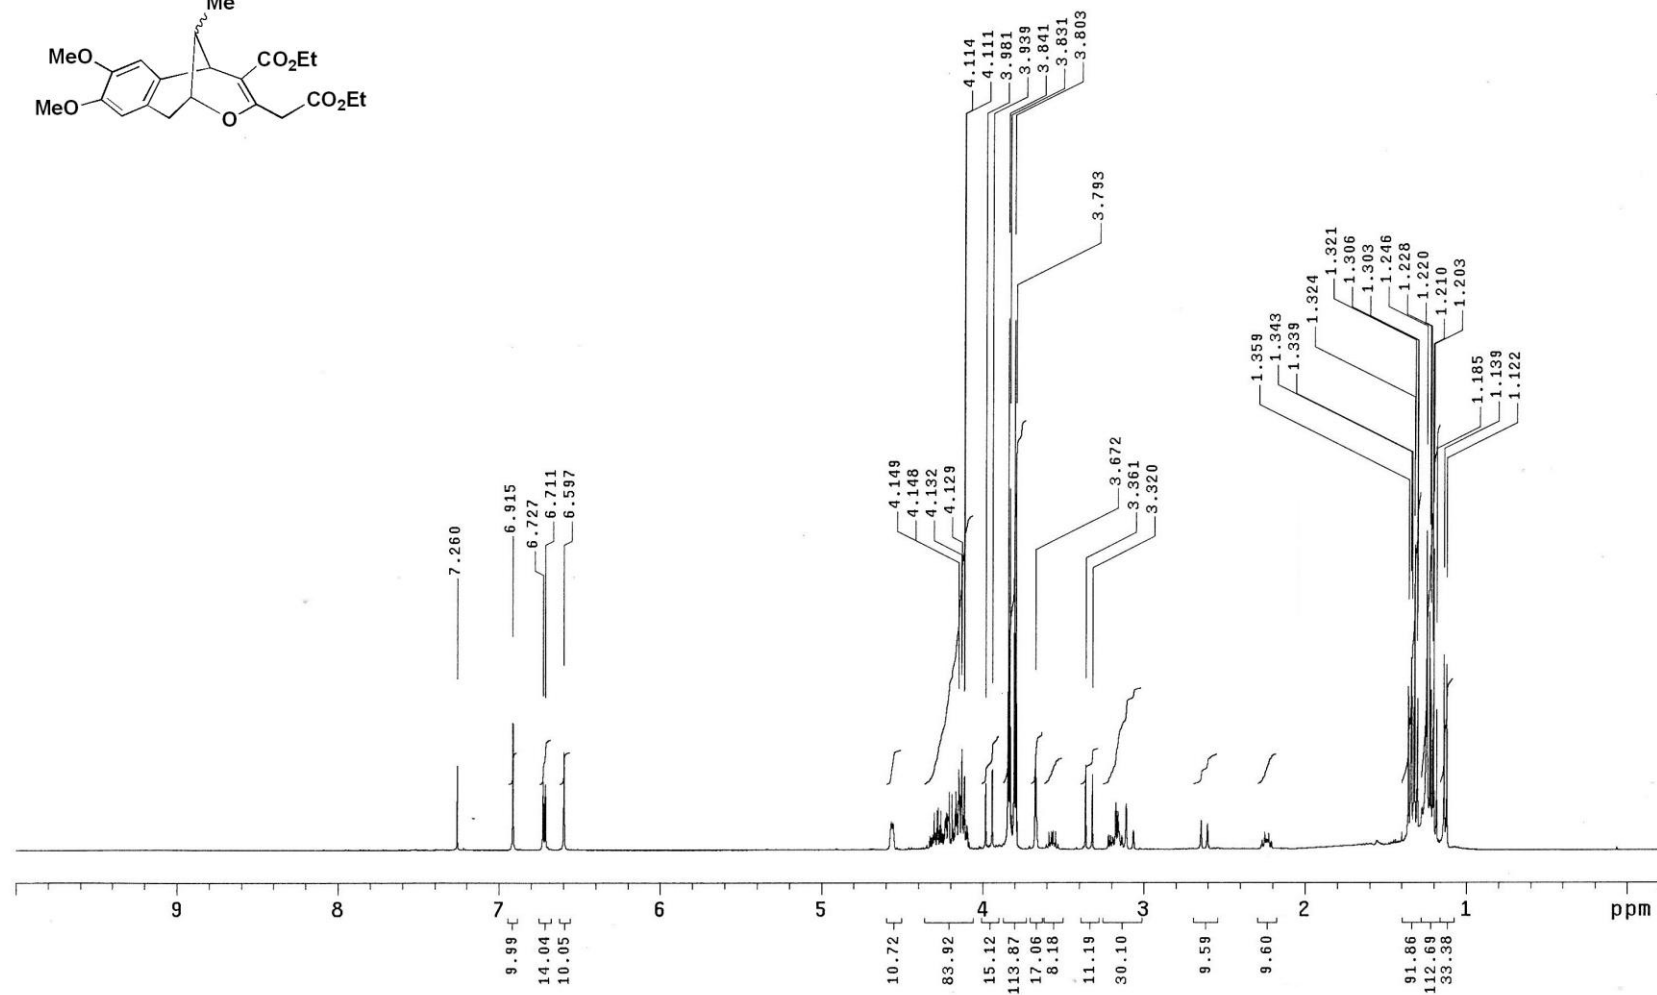

# Compound 6u (<sup>13</sup>C-NMR spectral data)

YNB0206

Pulse Sequence: s2pu1  
UNITYplus-400 "unity400"  
Date: Feb 7 2023  
Solvent: CDCl<sub>3</sub>  
Ambient temperature  
Total 3376 repetitions

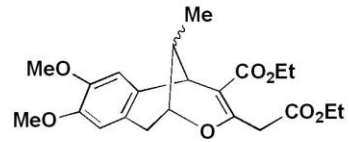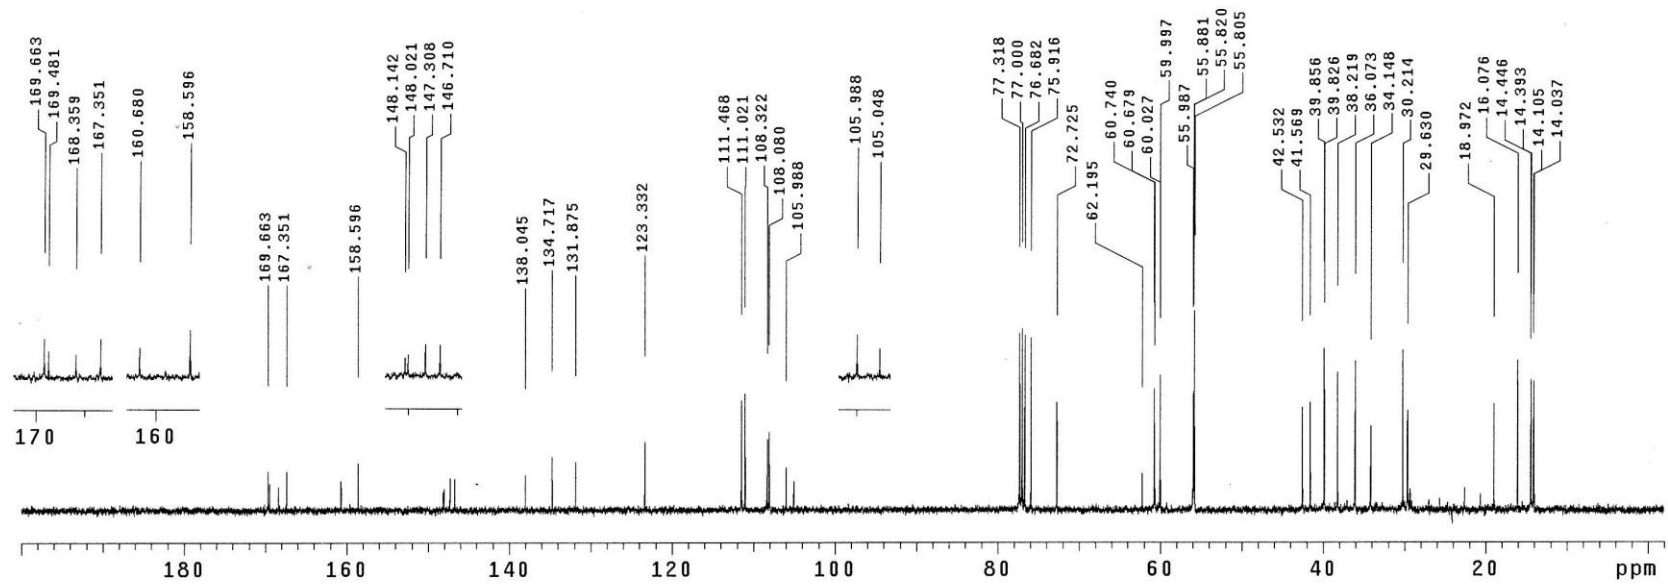

# Compound 6v (<sup>1</sup>H-NMR spectral data)

YNB1202

Pulse Sequence: s2pu1  
 UNITYplus-400 "unity400"  
 Date: Dec 2 2022  
 Solvent: CDCl<sub>3</sub>  
 Ambient temperature  
 Total 32 repetitions

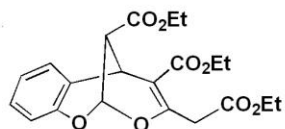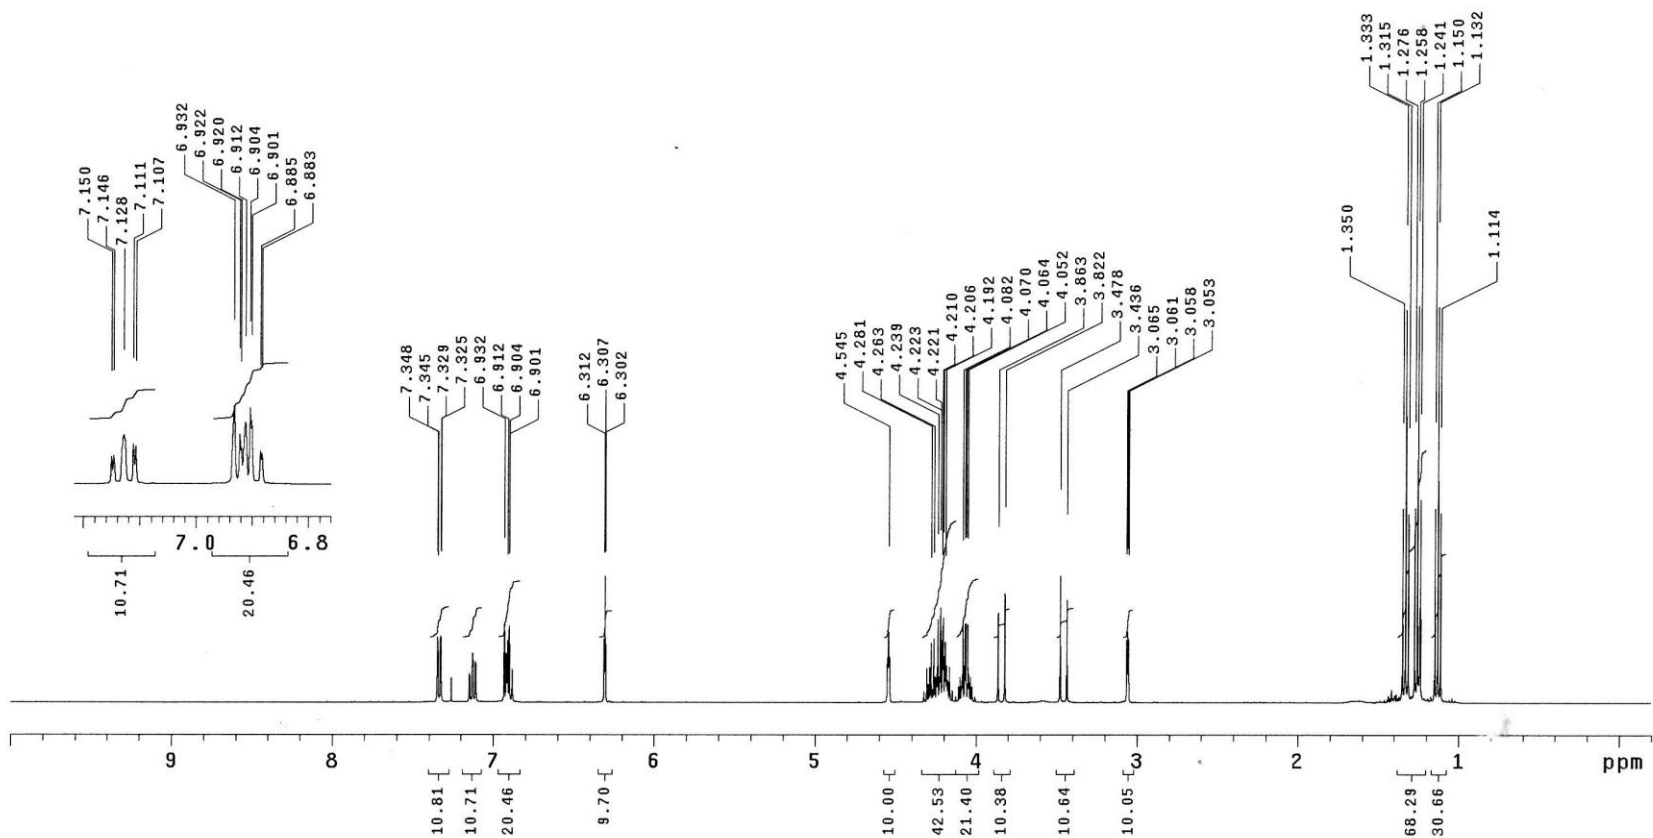

# Compound 6v (<sup>13</sup>C-NMR spectral data)

YNB1202

Pulse Sequence: s2pu1  
UNITYplus-400 "unity400"  
Date: Dec 2 2022  
Solvent: CDCl<sub>3</sub>  
Ambient temperature  
Total 720 repetitions

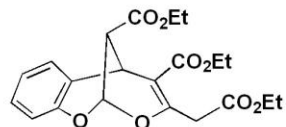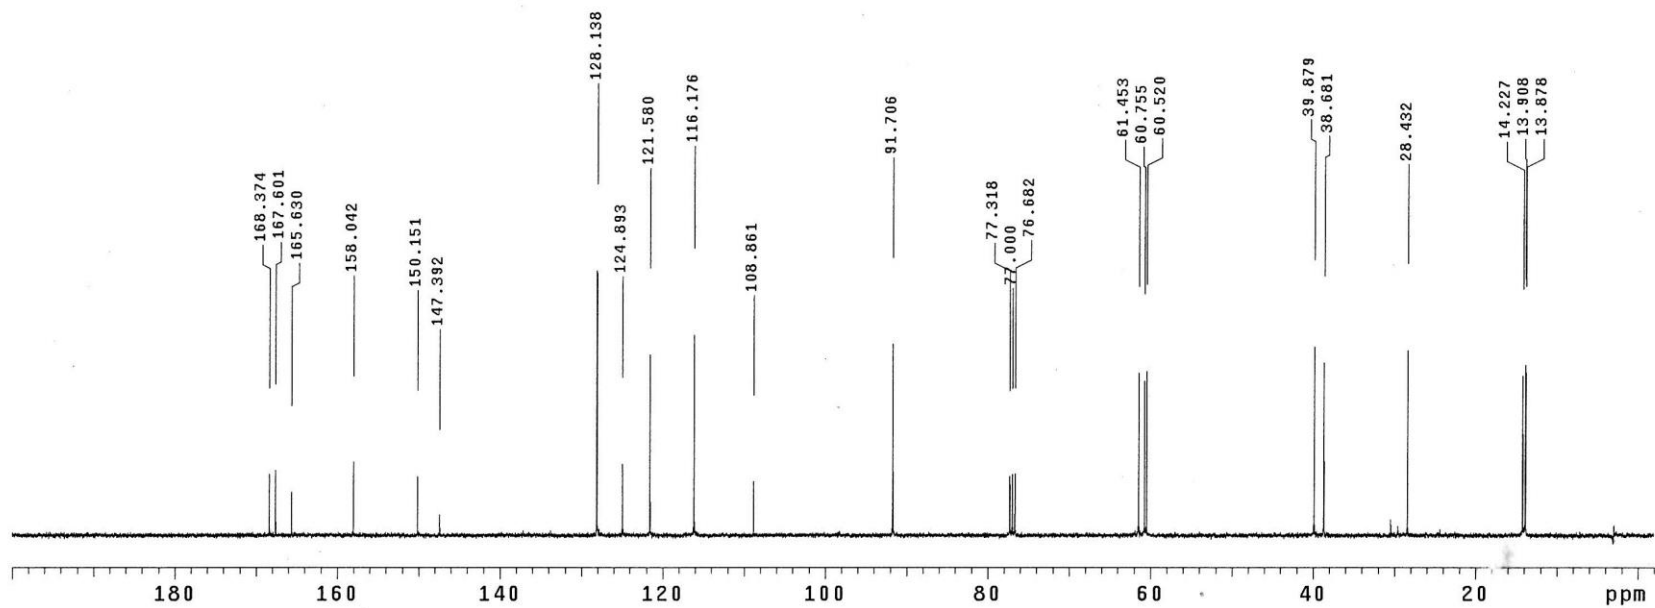

# Compound 6x (<sup>1</sup>H-NMR spectral data)

CHNF0410  
 Pulse Sequence: s2pu1  
 UNITYplus-400 "unity400"  
 Date: Apr 10 2023  
 Solvent: CDCl3  
 Ambient temperature  
 Total 340 repetitions

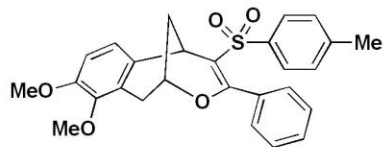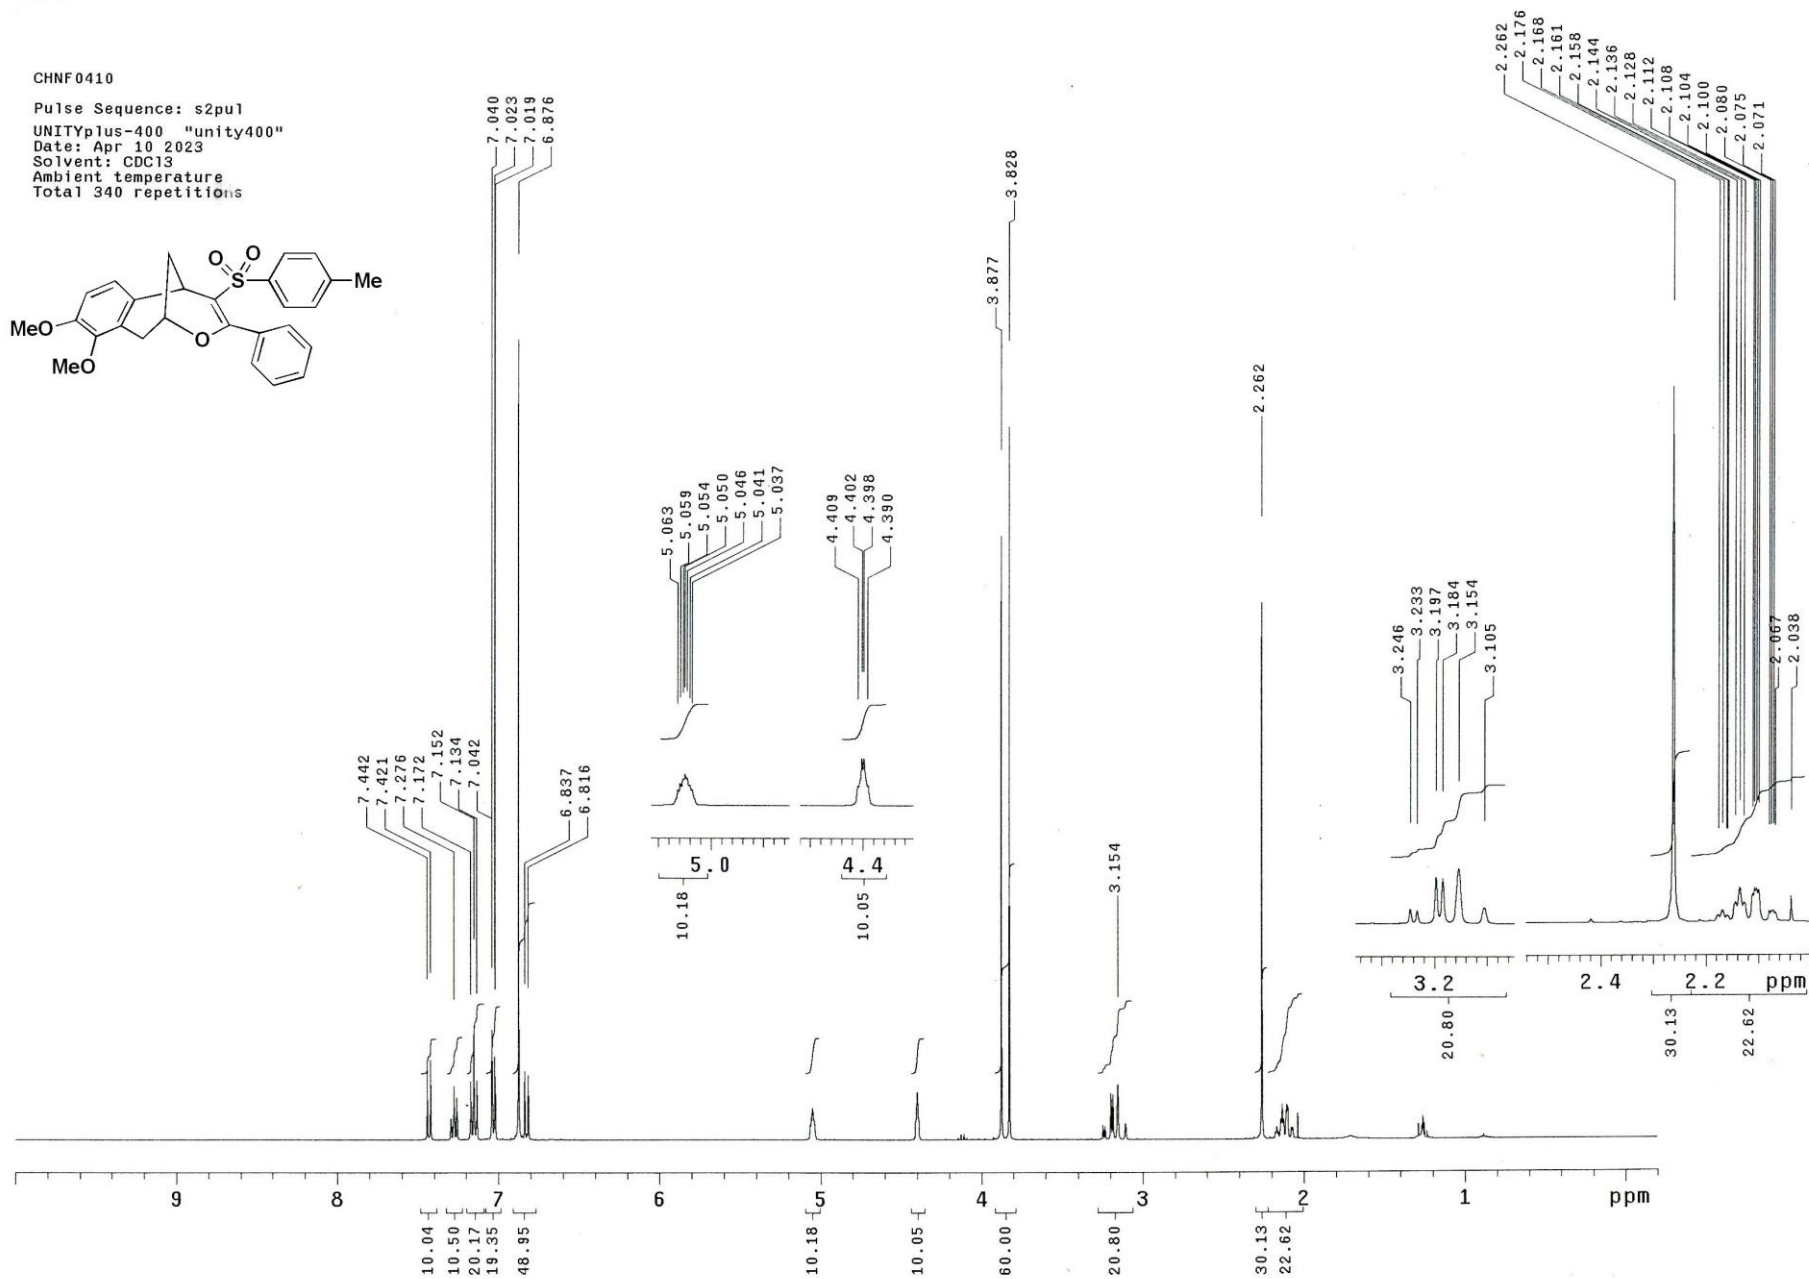



# Compound 6x (<sup>13</sup>C-NMR spectral data)

CHNF0410

Pulse Sequence: s2pu1

UNITYplus-400 "unity400"

Date: Sep 21 2023

Solvent: CDCl<sub>3</sub>

Ambient temperature

Total 4512 repetitions

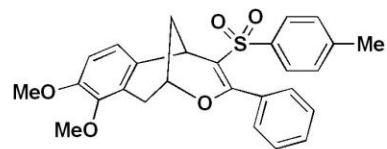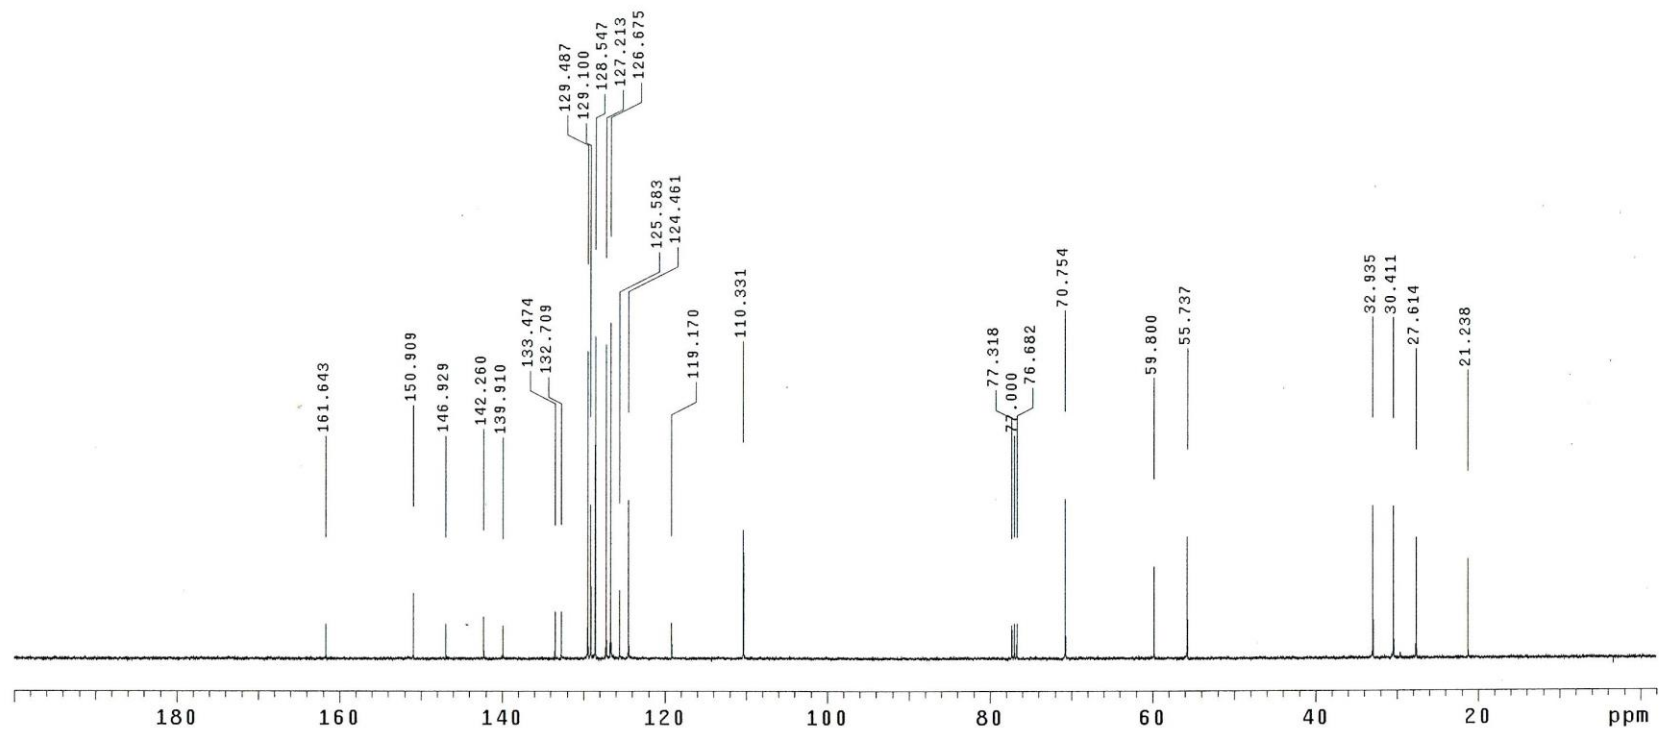



|                                             |                                                               |
|---------------------------------------------|---------------------------------------------------------------|
| Empirical formula                           | C <sub>18</sub> H <sub>20</sub> O <sub>4</sub>                |
| Formula weight                              | 298.35                                                        |
| Temperature/K                               | 130(2)                                                        |
| Crystal system                              | monoclinic                                                    |
| Space group                                 | P2 <sub>1</sub> /n                                            |
| a/Å                                         | 7.7589(4)                                                     |
| b/Å                                         | 10.0726(7)                                                    |
| c/Å                                         | 18.9645(10)                                                   |
| α/°                                         | 90                                                            |
| β/°                                         | 95.207(5)                                                     |
| γ/°                                         | 90                                                            |
| Volume/Å <sup>3</sup>                       | 1476.00(15)                                                   |
| Z                                           | 4                                                             |
| ρ <sub>calc</sub> /cm <sup>3</sup>          | 1.343                                                         |
| μ/mm <sup>-1</sup>                          | 0.091                                                         |
| F(000)                                      | 636.0                                                         |
| Crystal size/mm <sup>3</sup>                | 0.5 × 0.5 × 0.5                                               |
| Radiation                                   | Mo Kα (λ = 0.71073)                                           |
| 2θ range for data collection/°              | 4.314 to 54.134                                               |
| Index ranges                                | -9 ≤ h ≤ 9, -12 ≤ k ≤ 12, -24 ≤ l ≤ 23                        |
| Reflections collected                       | 23702                                                         |
| Independent reflections                     | 3082 [R <sub>int</sub> = 0.0789, R <sub>sigma</sub> = 0.0539] |
| Data/restraints/parameters                  | 3082/0/201                                                    |
| Goodness-of-fit on F <sup>2</sup>           | 1.078                                                         |
| Final R indexes [I ≥ 2σ (I)]                | R <sub>1</sub> = 0.0718, wR <sub>2</sub> = 0.1837             |
| Final R indexes [all data]                  | R <sub>1</sub> = 0.0845, wR <sub>2</sub> = 0.1897             |
| Largest diff. peak/hole / e Å <sup>-3</sup> | 0.42/-0.28                                                    |

## X-ray crystal data of compound 6r

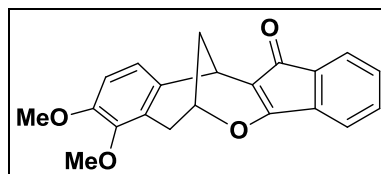

**Sample preparation** : A solution of compound **6r** (30 mg) in CH<sub>2</sub>Cl<sub>2</sub> (10 mL) was placed in a tube (10 mL). EtOAc (2 mL) was added slowly to the vial with a dropper. The vial was closed with little cotton and kept at room temperature for 2 days. Then, colorless prisms were observed.

**Crystal measurement** : X-ray crystal structures were determined with a Bruker Enraf-Nonius single-crystal diffractometer (CAD4, Kappa CCD). Thermal ellipsoids are drawn at 50% probability level.

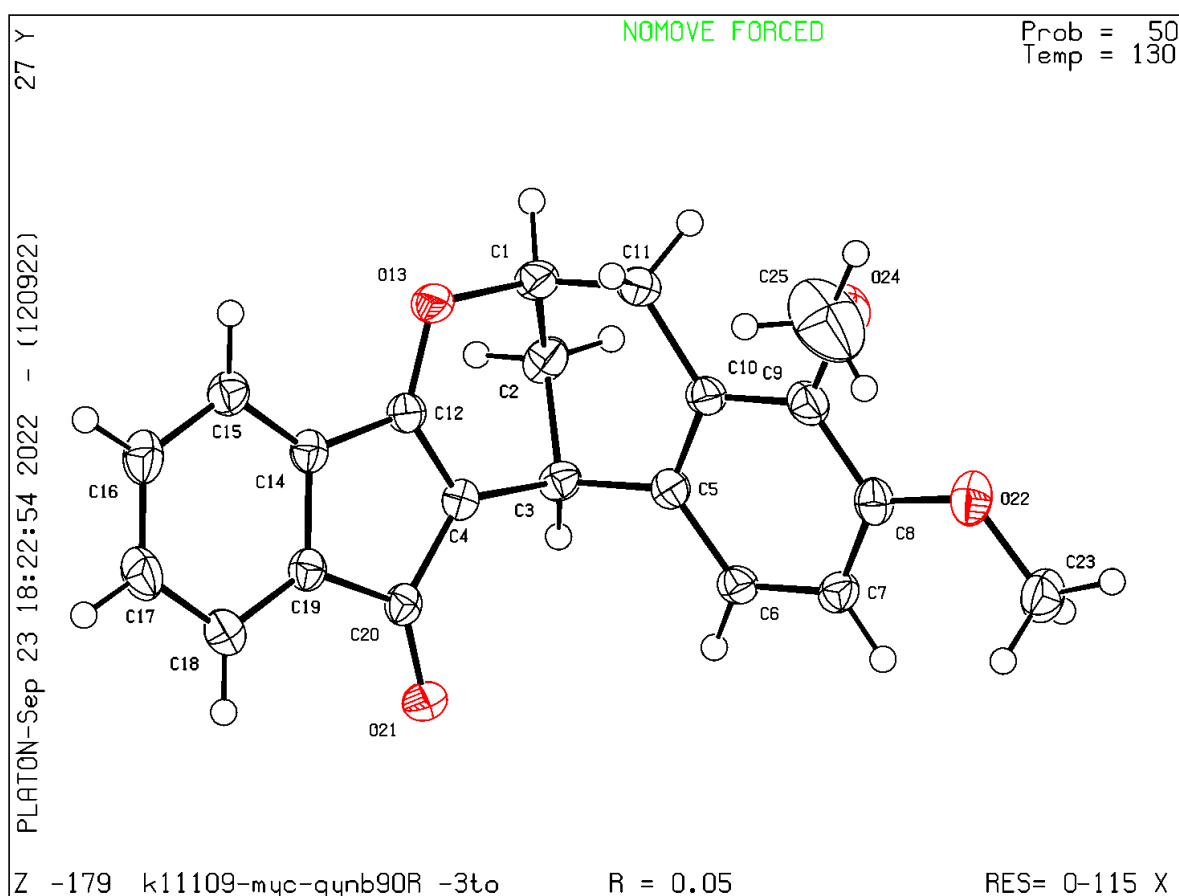

|                                             |                                                               |
|---------------------------------------------|---------------------------------------------------------------|
| Empirical formula                           | C <sub>21</sub> H <sub>18</sub> O <sub>4</sub>                |
| Formula weight                              | 334.35                                                        |
| Temperature/K                               | 130(2)                                                        |
| Crystal system                              | trigonal                                                      |
| Space group                                 | R-3                                                           |
| a/Å                                         | 36.9306(9)                                                    |
| b/Å                                         | 36.9306(9)                                                    |
| c/Å                                         | 6.4911(2)                                                     |
| α/°                                         | 90                                                            |
| β/°                                         | 90                                                            |
| γ/°                                         | 120                                                           |
| Volume/Å <sup>3</sup>                       | 7666.9(4)                                                     |
| Z                                           | 18                                                            |
| ρ <sub>calc</sub> /cm <sup>3</sup>          | 1.303                                                         |
| μ/mm <sup>-1</sup>                          | 0.090                                                         |
| F(000)                                      | 3168.0                                                        |
| Crystal size/mm <sup>3</sup>                | 0.4 × 0.2 × 0.2                                               |
| Radiation                                   | MoKα (λ = 0.71073)                                            |
| 2θ range for data collection/°              | 3.82 to 49.98                                                 |
| Index ranges                                | -43 ≤ h ≤ 43, -43 ≤ k ≤ 43, -7 ≤ l ≤ 7                        |
| Reflections collected                       | 51392                                                         |
| Independent reflections                     | 3005 [R <sub>int</sub> = 0.0960, R <sub>sigma</sub> = 0.0329] |
| Data/restraints/parameters                  | 3005/126/228                                                  |
| Goodness-of-fit on F <sup>2</sup>           | 1.066                                                         |
| Final R indexes [I ≥ 2σ (I)]                | R <sub>1</sub> = 0.0466, wR <sub>2</sub> = 0.1258             |
| Final R indexes [all data]                  | R <sub>1</sub> = 0.0550, wR <sub>2</sub> = 0.1311             |
| Largest diff. peak/hole / e Å <sup>-3</sup> | 0.79/-0.36                                                    |



|                                             |                                                               |
|---------------------------------------------|---------------------------------------------------------------|
| Empirical formula                           | C <sub>21</sub> H <sub>19</sub> NO <sub>3</sub>               |
| Formula weight                              | 333.37                                                        |
| Temperature/K                               | 130(2)                                                        |
| Crystal system                              | triclinic                                                     |
| Space group                                 | P-1                                                           |
| a/Å                                         | 8.3860(2)                                                     |
| b/Å                                         | 8.6370(2)                                                     |
| c/Å                                         | 12.3414(3)                                                    |
| α/°                                         | 103.452(2)                                                    |
| β/°                                         | 95.930(2)                                                     |
| γ/°                                         | 103.910(2)                                                    |
| Volume/Å <sup>3</sup>                       | 831.78(4)                                                     |
| Z                                           | 2                                                             |
| ρ <sub>calc</sub> /cm <sup>3</sup>          | 1.331                                                         |
| μ/mm <sup>-1</sup>                          | 0.089                                                         |
| F(000)                                      | 352.0                                                         |
| Crystal size/mm <sup>3</sup>                | 0.3 × 0.2 × 0.2                                               |
| Radiation                                   | Mo Kα (λ = 0.71073)                                           |
| 2θ range for data collection/°              | 3.442 to 54.116                                               |
| Index ranges                                | -10 ≤ h ≤ 10, -11 ≤ k ≤ 10, -15 ≤ l ≤ 15                      |
| Reflections collected                       | 18919                                                         |
| Independent reflections                     | 3472 [R <sub>int</sub> = 0.0350, R <sub>sigma</sub> = 0.0276] |
| Data/restraints/parameters                  | 3472/0/228                                                    |
| Goodness-of-fit on F <sup>2</sup>           | 1.106                                                         |
| Final R indexes [I ≥ 2σ (I)]                | R <sub>1</sub> = 0.0403, wR <sub>2</sub> = 0.1022             |
| Final R indexes [all data]                  | R <sub>1</sub> = 0.0500, wR <sub>2</sub> = 0.1077             |
| Largest diff. peak/hole / e Å <sup>-3</sup> | 0.20/-0.23                                                    |
